# Supplementary material for: Transcriptome Adaptation of the Ovine Mammary Gland to Dietary Supplementation of Extruded Linseed
Source: MDPI journal article supplement (doi:10.3390/ani11092707), 2021-09-16

## Transcriptome adaptation of the ovine mammary gland to dietary supplementation of extruded linseed.

G. Conte, T. Giordani, A. Vangelisti, A. Serra, M. Pauselli, A. Cavallini, and M. Mele

## Supplementary Figures and Tables

**Table S1.** Ingredients (g/kg as fed) of the experimental diets used.

| Ingredients          | Experimental concentrates |                |
|----------------------|---------------------------|----------------|
|                      | C <sup>1</sup>            | L <sup>2</sup> |
| Wheat bran           | 245.0                     | 273.0          |
| Corn                 | 100.0                     | 31.0           |
| Horse bean           | 100.0                     | 31.0           |
| Sunflower meal       | 50.0                      | 10.0           |
| Corn gluten          | 30.0                      | 10.0           |
| Dehydrated alfalfa   | 200.0                     | 273.0          |
| Barley               | 200.0                     | 97.0           |
| Molasses             | 50.0                      | 50.0           |
| Extruded linseed     | -                         | 200.0          |
| Calcium carbonate    | 10.0                      | 10.0           |
| Sodium bicarbonate   | 5.0                       | 5.0            |
| Di-calcium phosphate | 5.0                       | 5.0            |
| Sodium chloride      | 5.0                       | 5.0            |

1 C = control diet; 2 L = linseed diet

**Table S2.** Chemical composition (g/kg of DMI) of the experimental diets used in this trial.

|                                                        | Alfalfa hay | Rolled barley | Experimental concentrates |                |
|--------------------------------------------------------|-------------|---------------|---------------------------|----------------|
|                                                        |             |               | C <sup>2</sup>            | L <sup>3</sup> |
| <i>Chemical composition (g / kg of DM<sup>1</sup>)</i> |             |               |                           |                |
| CP                                                     | 139.3       | 118.6         | 183.8                     | 184.6          |
| EE                                                     | 20.5        | 34.4          | 25.0                      | 92.5           |
| NDF                                                    | 583.9       | 269.3         | 284.0                     | 320.0          |
| ADF                                                    | 427.0       | 102.5         | 142.2                     | 172.4          |
| ADL                                                    | 92.5        | 24.4          | 31.2                      | 42.1           |
| Ash                                                    | 79.4        | 26.8          | 82.9                      | 93.4           |
| ME (Mcal/kg DM)                                        | 1.71        | 3.02          | 2.62                      | 2.71           |
| <i>FA (% of total FAME)</i>                            |             |               |                           |                |
| C16:0                                                  | 32.2        | 26.7          | 11.9                      | 8.0            |
| C16:1                                                  | 1.7         | 0.7           | 0.1                       | 0.2            |
| C18:0                                                  | 6.1         | 4.3           | 4.8                       | 2.9            |
| C18:1 c9                                               | 5.4         | 14.5          | 20.8                      | 37.6           |
| C18:2 n6                                               | 24.0        | 32.2          | 53.8                      | 16.8           |
| C18:3 n3                                               | 30.6        | 21.5          | 8.6                       | 34.5           |

**Table S3.** List of differential expressed genes.

| NCBI genes id  | Log Fold Change | FDR corrected Pvalue | Gene regulation |
|----------------|-----------------|----------------------|-----------------|
| XM_027967101.1 | 14.05616687     | 3.28E-10             | Over expressed  |
| XM_027957158.1 | 13.67390467     | 0.13799039           | Over expressed  |
| XM_004004705.4 | 11.95577692     | 3.50E-13             | Over expressed  |
| XM_027965085.1 | 11.46736611     | 0.017406573          | Over expressed  |
| XM_027978824.1 | 11.4354444      | 0.009350713          | Over expressed  |
| XM_027966087.1 | 11.35426498     | 1.80E-05             | Over expressed  |
| XM_027979501.1 | 11.32282633     | 0.004119139          | Over expressed  |
| XM_012095243.1 | 10.82849696     | 0.008933872          | Over expressed  |
| XM_027978067.1 | 10.69450561     | 0.000257873          | Over expressed  |
| XM_027965192.1 | 10.63490619     | 3.51E-08             | Over expressed  |
| XM_027966613.1 | 10.58320356     | 2.56E-16             | Over expressed  |
| XM_012097000.3 | 10.56624121     | 1.73E-14             | Over expressed  |
| XM_012149537.3 | 10.52613001     | 0.000146986          | Over expressed  |
| XM_027979712.1 | 10.47812946     | 0.008805434          | Over expressed  |
| XM_027974155.1 | 10.46185335     | 1.20E-11             | Over expressed  |
| XM_027972106.1 | 10.31292868     | 0.146691955          | Over expressed  |
| XM_027980134.1 | 10.30886342     | 5.70E-22             | Over expressed  |
| XM_027959920.1 | 10.28703246     | 0.008785226          | Over expressed  |
| XM_012174558.2 | 10.17772845     | 0.146406744          | Over expressed  |
| XM_027969732.1 | 10.1657049      | 1.20E-08             | Over expressed  |
| XM_012173801.3 | 10.16375176     | 0.007413789          | Over expressed  |
| XM_004015216.4 | 10.15381106     | 0.022182876          | Over expressed  |
| XM_012174640.3 | 10.10581855     | 0.009047483          | Over expressed  |
| XM_027963795.1 | 10.09688752     | 1.04E-05             | Over expressed  |
| XM_027980188.1 | 10.08989798     | 0.008712863          | Over expressed  |
| XM_027972829.1 | 10.05168433     | 0.010209275          | Over expressed  |
| XM_015093298.2 | 9.950470464     | 0.129429789          | Over expressed  |
| XM_027956569.1 | 9.950202188     | 0.002627609          | Over expressed  |
| XM_012185973.3 | 9.740319855     | 0.138546134          | Over expressed  |
| XM_015104213.2 | 9.735869109     | 0.139119458          | Over expressed  |
| XM_012098288.2 | 9.73328275      | 0.023239185          | Over expressed  |
| XM_012183770.2 | 9.706270178     | 0.003904494          | Over expressed  |
| XM_027971826.1 | 9.702608697     | 0.008622725          | Over expressed  |
| XM_027963614.1 | 9.622091744     | 0.005604369          | Over expressed  |
| XM_012102877.3 | 9.437729075     | 0.050774793          | Over expressed  |
| XM_027961048.1 | 9.413650216     | 0.148077401          | Over expressed  |
| XM_027967045.1 | 9.405387627     | 0.007215849          | Over expressed  |
| XM_012186074.3 | 9.370320467     | 0.007398033          | Over expressed  |
| XM_012105738.3 | 9.328924973     | 0.139801983          | Over expressed  |
| XM_027970021.1 | 9.305554181     | 0.033731472          | Over expressed  |
| XM_027965670.1 | 9.264462874     | 0.10105908           | Over expressed  |

|                |             |             |                |
|----------------|-------------|-------------|----------------|
| XM_015099223.2 | 9.218145869 | 0.02022809  | Over expressed |
| XM_015096959.2 | 9.202470179 | 6.95E-06    | Over expressed |
| XM_027967689.1 | 9.196267482 | 2.48E-06    | Over expressed |
| XM_027959171.1 | 9.192589259 | 0.007163966 | Over expressed |
| XM_004022954.4 | 9.158777196 | 0.009155017 | Over expressed |
| XM_027968878.1 | 9.084524624 | 4.33E-11    | Over expressed |
| XM_027971137.1 | 9.019185077 | 0.12727726  | Over expressed |
| XM_027974499.1 | 8.997430857 | 0.146069833 | Over expressed |
| XM_027974058.1 | 8.99613291  | 1.62E-24    | Over expressed |
| XM_015099862.2 | 8.965082065 | 0.128485516 | Over expressed |
| XM_027965031.1 | 8.947551024 | 0.147177564 | Over expressed |
| XM_012179334.3 | 8.943887249 | 2.22E-13    | Over expressed |
| XM_015095779.2 | 8.908423954 | 0.003935723 | Over expressed |
| XM_027974942.1 | 8.906889546 | 6.95E-06    | Over expressed |
| XR_001435201.2 | 8.800991149 | 0.011331293 | Over expressed |
| XM_027964204.1 | 8.755091798 | 0.029824081 | Over expressed |
| XM_004004560.3 | 8.731324517 | 8.55E-06    | Over expressed |
| XM_027978691.1 | 8.722323104 | 0.005802086 | Over expressed |
| XM_027970155.1 | 8.707532363 | 0.003330493 | Over expressed |
| XM_027957585.1 | 8.689229982 | 0.011116972 | Over expressed |
| XM_027965300.1 | 8.669154586 | 0.018226466 | Over expressed |
| XR_001041614.3 | 8.661999774 | 0.000111703 | Over expressed |
| XM_027962107.1 | 8.627424125 | 0.004019574 | Over expressed |
| XM_012098874.3 | 8.61825285  | 0.128794307 | Over expressed |
| XM_027968179.1 | 8.613484788 | 0.140216823 | Over expressed |
| XM_027968784.1 | 8.611652415 | 0.006635075 | Over expressed |
| XM_027966208.1 | 8.577781713 | 0.143047857 | Over expressed |
| XM_027975324.1 | 8.454369294 | 0.130933705 | Over expressed |
| XM_027967409.1 | 8.422260602 | 0.006164355 | Over expressed |
| XM_027958906.1 | 8.364310923 | 0.018447967 | Over expressed |
| XM_027956878.1 | 8.329888987 | 0.013022257 | Over expressed |
| XM_027959957.1 | 8.317604408 | 0.144023509 | Over expressed |
| XM_027961403.1 | 8.256155632 | 0.128962639 | Over expressed |
| XM_012107696.2 | 8.208222335 | 0.140198803 | Over expressed |
| XM_027973197.1 | 8.173239375 | 0.030572208 | Over expressed |
| XM_012107672.2 | 8.152652198 | 0.144023509 | Over expressed |
| XM_027973514.1 | 8.128216679 | 0.013372331 | Over expressed |
| XM_012175689.3 | 8.110851014 | 1.56E-14    | Over expressed |
| XM_027962432.1 | 8.050082692 | 0.008792602 | Over expressed |
| XM_027961266.1 | 8.022753864 | 1.43E-23    | Over expressed |
| XM_027970502.1 | 7.959372127 | 0.001507388 | Over expressed |
| XM_027976799.1 | 7.956330998 | 0.01828691  | Over expressed |
| XM_027975334.1 | 7.943116601 | 3.27E-05    | Over expressed |
| XM_012181601.2 | 7.908168109 | 1.43E-23    | Over expressed |

|                |             |             |                |
|----------------|-------------|-------------|----------------|
| XM_012099819.3 | 7.854196552 | 0.127903557 | Over expressed |
| XM_027967320.1 | 7.82646508  | 0.005741206 | Over expressed |
| XM_027965384.1 | 7.792380779 | 0.020099076 | Over expressed |
| XM_027976260.1 | 7.642225396 | 0.040066284 | Over expressed |
| XM_027973376.1 | 7.640529849 | 0.009903269 | Over expressed |
| XM_027961773.1 | 7.603291905 | 0.129296313 | Over expressed |
| XM_027959550.1 | 7.595845018 | 2.03E-07    | Over expressed |
| XM_027964282.1 | 7.593642293 | 0.017658529 | Over expressed |
| XM_027958140.1 | 7.57921332  | 0.083570707 | Over expressed |
| XM_004011297.4 | 7.576674062 | 0.14598292  | Over expressed |
| XM_027978798.1 | 7.528014733 | 0.021421875 | Over expressed |
| XM_027959543.1 | 7.519025675 | 0.138756575 | Over expressed |
| XM_027977104.1 | 7.513454172 | 2.46E-07    | Over expressed |
| XM_012181362.3 | 7.445311359 | 0.139019656 | Over expressed |
| XM_027956499.1 | 7.39649105  | 0.001141103 | Over expressed |
| XM_004002634.4 | 7.370377573 | 0.000146787 | Over expressed |
| XR_001023602.3 | 7.328368925 | 0.124851399 | Over expressed |
| XM_004012668.4 | 7.282480196 | 0.001296987 | Over expressed |
| XM_027961197.1 | 7.277492596 | 0.061008198 | Over expressed |
| XM_015093423.2 | 7.203439145 | 0.147646218 | Over expressed |
| XM_027978639.1 | 7.186964621 | 0.128334757 | Over expressed |
| XM_027966610.1 | 7.096713856 | 0.001910145 | Over expressed |
| XM_027970173.1 | 7.06628043  | 0.014706451 | Over expressed |
| XM_027969820.1 | 7.04290962  | 0.147632137 | Over expressed |
| XM_012120593.3 | 6.995424169 | 1.25E-11    | Over expressed |
| XM_027966158.1 | 6.897505202 | 0.023598824 | Over expressed |
| XM_027958988.1 | 6.88803505  | 0.00090434  | Over expressed |
| XM_027978610.1 | 6.885381514 | 0.005349469 | Over expressed |
| XM_027970480.1 | 6.869162994 | 0.01380001  | Over expressed |
| XM_027974699.1 | 6.86322605  | 0.001160346 | Over expressed |
| XM_012106597.3 | 6.832892928 | 1.19E-06    | Over expressed |
| XM_012190383.3 | 6.822474241 | 0.123193872 | Over expressed |
| XM_012095505.3 | 6.800424252 | 0.063321285 | Over expressed |
| XM_027956922.1 | 6.723218677 | 0.00652663  | Over expressed |
| XM_012169224.3 | 6.721995012 | 0.003624264 | Over expressed |
| XR_003589130.1 | 6.705777749 | 0.016899885 | Over expressed |
| XM_027970424.1 | 6.699726235 | 0.05608977  | Over expressed |
| XM_027969405.1 | 6.685350113 | 0.142857232 | Over expressed |
| XM_027978603.1 | 6.533814554 | 0.062748005 | Over expressed |
| XM_012173665.3 | 6.451115405 | 0.044694607 | Over expressed |
| XM_027978095.1 | 6.440257266 | 0.122511419 | Over expressed |
| XM_012184557.3 | 6.362498761 | 0.123211423 | Over expressed |
| XM_012190414.3 | 6.329016758 | 0.043432759 | Over expressed |
| XM_012096925.3 | 6.29843407  | 0.070637281 | Over expressed |

|                |             |             |                |
|----------------|-------------|-------------|----------------|
| XM_027961343.1 | 6.292746486 | 0.049811443 | Over expressed |
| XR_003587966.1 | 6.211426399 | 0.049772275 | Over expressed |
| XM_027956441.1 | 6.113936273 | 7.61E-11    | Over expressed |
| XM_027968258.1 | 6.026262219 | 0.003282492 | Over expressed |
| XM_004018362.4 | 6.012168031 | 0.020781231 | Over expressed |
| NM_001282138.1 | 5.980377648 | 0.006130053 | Over expressed |
| XM_027961424.1 | 5.920551842 | 0.01225965  | Over expressed |
| XR_003589614.1 | 5.917453803 | 0.050363079 | Over expressed |
| XM_027973558.1 | 5.874393067 | 0.035322497 | Over expressed |
| XM_027975158.1 | 5.872938045 | 0.023509551 | Over expressed |
| NM_001126366.1 | 5.856077776 | 0.000652139 | Over expressed |
| XM_027967114.1 | 5.839411314 | 0.093221108 | Over expressed |
| XM_012130264.3 | 5.753281327 | 6.18E-06    | Over expressed |
| XM_015101286.2 | 5.733599322 | 0.000642333 | Over expressed |
| XM_027959712.1 | 5.645987355 | 0.032858196 | Over expressed |
| XM_027969547.1 | 5.636788416 | 2.35E-19    | Over expressed |
| XR_003588037.1 | 5.625750957 | 0.046968184 | Over expressed |
| XM_012178324.2 | 5.605979834 | 0.085925719 | Over expressed |
| XM_027960692.1 | 5.573178919 | 0.02166044  | Over expressed |
| XR_003587153.1 | 5.516751459 | 0.039406816 | Over expressed |
| XM_027973357.1 | 5.462584664 | 0.134061092 | Over expressed |
| XM_027969947.1 | 5.451310302 | 0.086907817 | Over expressed |
| XM_004004082.4 | 5.355237442 | 0.141543272 | Over expressed |
| XM_012096791.2 | 5.31742382  | 0.084035725 | Over expressed |
| XM_015100284.2 | 5.298419977 | 0.034005553 | Over expressed |
| XM_027968588.1 | 5.296593361 | 0.131808116 | Over expressed |
| XM_027962547.1 | 5.269127952 | 0.129080677 | Over expressed |
| XM_004015398.4 | 5.22974707  | 0.129167027 | Over expressed |
| XR_003586219.1 | 5.220215638 | 0.06431498  | Over expressed |
| XM_027957558.1 | 5.18859248  | 0.03817186  | Over expressed |
| XM_012103032.3 | 5.179651718 | 0.024990657 | Over expressed |
| XM_027979483.1 | 5.124414697 | 0.094282709 | Over expressed |
| XM_012145933.3 | 5.081013143 | 0.064733848 | Over expressed |
| XM_027978764.1 | 5.074088839 | 0.005249634 | Over expressed |
| XM_015103390.2 | 5.060668972 | 0.083315722 | Over expressed |
| XM_027974427.1 | 5.000683469 | 0.134961107 | Over expressed |
| XM_027959083.1 | 4.952375849 | 0.081729291 | Over expressed |
| XM_027962104.1 | 4.887547525 | 0.027580726 | Over expressed |
| XM_027973351.1 | 4.870750121 | 0.104787921 | Over expressed |
| XM_027959921.1 | 4.845727343 | 0.125073826 | Over expressed |
| XM_004015395.3 | 4.80397937  | 0.032574103 | Over expressed |
| XM_027967970.1 | 4.7982733   | 0.044895897 | Over expressed |
| XM_027965538.1 | 4.754432791 | 0.108619376 | Over expressed |
| XM_012189971.2 | 4.682000668 | 1.59E-09    | Over expressed |

|                |             |             |                |
|----------------|-------------|-------------|----------------|
| XR_003586398.1 | 4.670107765 | 0.097737873 | Over expressed |
| XM_027967408.1 | 4.670042888 | 0.147665985 | Over expressed |
| XM_027978849.1 | 4.664969074 | 0.125724353 | Over expressed |
| XM_012178039.3 | 4.582745309 | 0.071909275 | Over expressed |
| XM_012187144.2 | 4.531465237 | 0.127437844 | Over expressed |
| NM_001009774.3 | 4.497633009 | 0.024261056 | Over expressed |
| XM_027968321.1 | 4.451221053 | 0.004716716 | Over expressed |
| XM_027980275.1 | 4.420074226 | 0.003450801 | Over expressed |
| XM_027977436.1 | 4.41688048  | 0.042807627 | Over expressed |
| XM_012096405.3 | 4.404579219 | 0.003836091 | Over expressed |
| XM_012102718.3 | 4.403700189 | 0.127289261 | Over expressed |
| XM_004018431.4 | 4.402739575 | 0.049002159 | Over expressed |
| XM_027975116.1 | 4.397440565 | 0.100569221 | Over expressed |
| XM_027974521.1 | 4.396219802 | 0.028011135 | Over expressed |
| XM_027961288.1 | 4.380229537 | 0.003527047 | Over expressed |
| XM_027965388.1 | 4.339713307 | 0.093173579 | Over expressed |
| XM_027973480.1 | 4.331977521 | 0.007413789 | Over expressed |
| XM_012190181.3 | 4.323434098 | 0.134188408 | Over expressed |
| XM_027962679.1 | 4.316820022 | 0.112206663 | Over expressed |
| XR_001434329.2 | 4.310865036 | 0.009470702 | Over expressed |
| XM_027966147.1 | 4.285531641 | 0.136552173 | Over expressed |
| NR_107953.1    | 4.273827377 | 0.088608902 | Over expressed |
| XM_027956657.1 | 4.226702443 | 0.000312328 | Over expressed |
| XM_012188703.2 | 4.183173123 | 0.031828754 | Over expressed |
| XM_012098716.3 | 4.170989637 | 0.01556651  | Over expressed |
| XR_003588432.1 | 4.148019549 | 0.037413702 | Over expressed |
| XM_027966819.1 | 4.135158925 | 0.069503187 | Over expressed |
| XM_012102859.2 | 4.1289564   | 0.086606981 | Over expressed |
| XM_015104664.2 | 4.104440306 | 0.010527307 | Over expressed |
| XM_027958399.1 | 4.09627443  | 0.018061258 | Over expressed |
| XM_027966103.1 | 4.078083004 | 0.147499337 | Over expressed |
| XM_012185671.3 | 4.049443561 | 0.019705513 | Over expressed |
| XM_027956882.1 | 4.011094754 | 0.073304131 | Over expressed |
| XM_027956937.1 | 3.98219055  | 0.102526499 | Over expressed |
| XM_027966136.1 | 3.960754683 | 0.047872437 | Over expressed |
| XM_027974448.1 | 3.936282837 | 0.010890013 | Over expressed |
| XM_027963835.1 | 3.924692469 | 0.043400475 | Over expressed |
| XM_027965917.1 | 3.913522054 | 0.122562539 | Over expressed |
| XM_027975093.1 | 3.899084543 | 0.046931213 | Over expressed |
| XM_027967762.1 | 3.883759781 | 0.00439289  | Over expressed |
| XM_027959818.1 | 3.873080984 | 0.004976659 | Over expressed |
| XM_004008129.4 | 3.851895116 | 0.014255666 | Over expressed |
| XM_027962131.1 | 3.798084115 | 0.087873872 | Over expressed |
| XM_027957859.1 | 3.795559685 | 0.001797027 | Over expressed |

|                |             |             |                |
|----------------|-------------|-------------|----------------|
| XM_012185695.3 | 3.776090768 | 0.061431822 | Over expressed |
| XM_027967506.1 | 3.751879445 | 0.080911067 | Over expressed |
| XM_027974124.1 | 3.751054622 | 9.24E-08    | Over expressed |
| XM_015100027.2 | 3.750284002 | 0.000213057 | Over expressed |
| XM_027974501.1 | 3.740975248 | 0.00119733  | Over expressed |
| XR_003590846.1 | 3.740206    | 0.010237078 | Over expressed |
| XM_027957281.1 | 3.726118358 | 0.109242473 | Over expressed |
| XR_003588878.1 | 3.7254887   | 0.093765712 | Over expressed |
| XM_012183804.1 | 3.717403168 | 0.042247525 | Over expressed |
| XR_003589064.1 | 3.7041914   | 0.086197018 | Over expressed |
| XM_015098545.2 | 3.703344533 | 0.105217377 | Over expressed |
| XM_027959636.1 | 3.70150094  | 0.112444848 | Over expressed |
| XM_027968059.1 | 3.700665595 | 0.047872437 | Over expressed |
| XM_027975514.1 | 3.697735582 | 0.000896743 | Over expressed |
| NM_001162545.1 | 3.687689812 | 0.090169349 | Over expressed |
| XM_027979792.1 | 3.672240114 | 2.09E-05    | Over expressed |
| XM_027968998.1 | 3.670245443 | 0.093173579 | Over expressed |
| XM_027957472.1 | 3.666150539 | 0.071849297 | Over expressed |
| XM_027969379.1 | 3.63886024  | 0.056350326 | Over expressed |
| XM_015100290.2 | 3.627046263 | 0.004963364 | Over expressed |
| XM_027978314.1 | 3.595328716 | 0.050774793 | Over expressed |
| XM_027977999.1 | 3.593855599 | 0.020762164 | Over expressed |
| XM_027974502.1 | 3.588914239 | 0.146817476 | Over expressed |
| XM_004012742.4 | 3.582512144 | 0.057072535 | Over expressed |
| XM_027971415.1 | 3.573117695 | 0.095164789 | Over expressed |
| XM_027961262.1 | 3.566285438 | 0.114276131 | Over expressed |
| XM_027962249.1 | 3.550320613 | 0.01035351  | Over expressed |
| XM_027960842.1 | 3.548787401 | 0.021421875 | Over expressed |
| XR_001435442.2 | 3.524420159 | 0.036080406 | Over expressed |
| XM_027969619.1 | 3.521965054 | 0.068576147 | Over expressed |
| XM_012190684.3 | 3.516002568 | 0.013093738 | Over expressed |
| XM_027965559.1 | 3.50938903  | 0.011815879 | Over expressed |
| XM_012177565.3 | 3.503467721 | 0.118281968 | Over expressed |
| XM_027960291.1 | 3.499228857 | 6.87E-06    | Over expressed |
| XR_003588172.1 | 3.494792752 | 0.084467286 | Over expressed |
| XM_012098663.3 | 3.489304418 | 0.067797253 | Over expressed |
| XM_012126652.3 | 3.473682287 | 0.050135514 | Over expressed |
| XM_027969549.1 | 3.46427637  | 9.01E-05    | Over expressed |
| XM_027975974.1 | 3.455913932 | 0.051417105 | Over expressed |
| XM_027967173.1 | 3.432413847 | 0.004734909 | Over expressed |
| XM_012158633.3 | 3.431992047 | 0.147381143 | Over expressed |
| XM_004015352.4 | 3.428725449 | 0.052261732 | Over expressed |
| XM_027976050.1 | 3.411243815 | 0.016863613 | Over expressed |
| XR_003586392.1 | 3.400384735 | 6.35E-08    | Over expressed |

|                |             |             |                |
|----------------|-------------|-------------|----------------|
| XM_027966462.1 | 3.39007942  | 0.066977628 | Over expressed |
| XM_027967996.1 | 3.385290514 | 0.005346166 | Over expressed |
| XM_027975669.1 | 3.385130991 | 0.135789221 | Over expressed |
| XM_027962405.1 | 3.378231972 | 6.87E-06    | Over expressed |
| XR_003585528.1 | 3.372177722 | 9.89E-11    | Over expressed |
| XM_027974057.1 | 3.369411389 | 0.104618029 | Over expressed |
| XM_027970397.1 | 3.367947921 | 0.051225037 | Over expressed |
| XR_003586124.1 | 3.36747672  | 0.097704543 | Over expressed |
| XR_003589866.1 | 3.359881247 | 0.001825172 | Over expressed |
| XM_004023496.4 | 3.354842123 | 0.000646533 | Over expressed |
| XM_027971322.1 | 3.352857617 | 0.128596432 | Over expressed |
| XM_027978458.1 | 3.331535521 | 0.010662357 | Over expressed |
| XM_027962743.1 | 3.308642168 | 0.133471132 | Over expressed |
| XM_027978860.1 | 3.302190054 | 6.09E-05    | Over expressed |
| XM_027963525.1 | 3.28791888  | 0.024372266 | Over expressed |
| XM_027968291.1 | 3.282964205 | 0.01727368  | Over expressed |
| XM_027969756.1 | 3.275807319 | 0.040611246 | Over expressed |
| XM_027968789.1 | 3.270360763 | 0.003720507 | Over expressed |
| XM_004017510.3 | 3.269206892 | 0.002641912 | Over expressed |
| XM_012174650.2 | 3.261131096 | 0.017406573 | Over expressed |
| XM_015102282.2 | 3.256553091 | 0.130933705 | Over expressed |
| XM_004015234.3 | 3.224965371 | 0.097704543 | Over expressed |
| XM_027961646.1 | 3.198506995 | 0.101316526 | Over expressed |
| XM_015101004.2 | 3.191118441 | 0.019558062 | Over expressed |
| XM_027960007.1 | 3.172344544 | 0.000163787 | Over expressed |
| XM_015094858.2 | 3.16161988  | 0.008617917 | Over expressed |
| XR_003591641.1 | 3.158048778 | 0.044718896 | Over expressed |
| XM_027959673.1 | 3.157296431 | 0.001770161 | Over expressed |
| XM_027971275.1 | 3.136928502 | 0.010237078 | Over expressed |
| XM_027963765.1 | 3.136659793 | 0.125073826 | Over expressed |
| XM_027977395.1 | 3.127686898 | 0.000183562 | Over expressed |
| XM_027978099.1 | 3.124653674 | 0.05866608  | Over expressed |
| XM_004015233.4 | 3.123571506 | 0.122693503 | Over expressed |
| XM_012181882.3 | 3.122179935 | 0.036282311 | Over expressed |
| XM_027965229.1 | 3.115432965 | 2.76E-09    | Over expressed |
| XM_027977519.1 | 3.110120151 | 0.099181007 | Over expressed |
| XM_004019688.4 | 3.103558285 | 0.131249752 | Over expressed |
| XM_027969860.1 | 3.097342885 | 0.06263427  | Over expressed |
| XM_027973944.1 | 3.094520671 | 0.003061434 | Over expressed |
| XM_027977407.1 | 3.089298564 | 0.069328983 | Over expressed |
| XM_027967938.1 | 3.087621261 | 0.001020787 | Over expressed |
| NR_107962.1    | 3.086737464 | 0.052730363 | Over expressed |
| XM_027977163.1 | 3.085391146 | 0.018200669 | Over expressed |
| XM_027961107.1 | 3.084900377 | 0.115808202 | Over expressed |



|                |             |             |                |
|----------------|-------------|-------------|----------------|
| XM_027978459.1 | 3.080753084 | 0.000209246 | Over expressed |
| XM_027957877.1 | 3.080175554 | 0.000853046 | Over expressed |
| XM_015092222.2 | 3.075203176 | 5.13E-05    | Over expressed |
| XM_027962624.1 | 3.074234348 | 0.031308523 | Over expressed |
| XM_027979831.1 | 3.04936248  | 0.064873365 | Over expressed |
| XM_027959254.1 | 3.043439869 | 1.52E-12    | Over expressed |
| XM_004010380.3 | 3.037028546 | 0.130933705 | Over expressed |
| NM_001009220.1 | 3.036222653 | 0.097574786 | Over expressed |
| XM_027961468.1 | 3.018784943 | 5.84E-05    | Over expressed |
| XM_012131679.3 | 3.018010404 | 0.043359338 | Over expressed |
| NM_001139448.1 | 3.016979993 | 0.025010063 | Over expressed |
| XM_027961369.1 | 3.012031454 | 0.007234519 | Over expressed |
| NM_001009436.1 | 2.999268627 | 0.080676102 | Over expressed |
| XM_027975447.1 | 2.99890635  | 0.000674865 | Over expressed |
| XR_003590817.1 | 2.99694815  | 0.026127568 | Over expressed |
| XM_027976055.1 | 2.994939371 | 0.115642766 | Over expressed |
| XM_027959977.1 | 2.992641796 | 0.010297484 | Over expressed |
| XM_027966616.1 | 2.984682166 | 0.038616448 | Over expressed |
| XM_027963220.1 | 2.966273243 | 0.038453148 | Over expressed |
| XM_012175808.3 | 2.962118612 | 0.000113376 | Over expressed |
| XM_027974649.1 | 2.953976136 | 0.004979877 | Over expressed |
| XM_012174787.2 | 2.952730243 | 0.06847315  | Over expressed |
| XM_027972878.1 | 2.952538117 | 0.01867031  | Over expressed |
| XM_012149891.3 | 2.948825242 | 1.54E-05    | Over expressed |
| XM_027967758.1 | 2.948496927 | 0.059454582 | Over expressed |
| XM_027969457.1 | 2.944347395 | 0.030793443 | Over expressed |
| XM_027978899.1 | 2.934500943 | 0.000666349 | Over expressed |
| XM_027977795.1 | 2.932125638 | 0.019529324 | Over expressed |
| XM_012105513.2 | 2.926950135 | 0.00040445  | Over expressed |
| XM_027962322.1 | 2.926444877 | 0.018337655 | Over expressed |
| XM_027968157.1 | 2.923397709 | 0.141322302 | Over expressed |
| XM_012166381.3 | 2.921350142 | 0.043808817 | Over expressed |
| XM_012178435.2 | 2.919602941 | 0.000235346 | Over expressed |
| XM_027959581.1 | 2.918553534 | 1.14E-05    | Over expressed |
| XM_015095645.2 | 2.912897714 | 0.011554037 | Over expressed |
| NM_001078655.1 | 2.911264659 | 0.000116674 | Over expressed |
| XM_027960006.1 | 2.911012924 | 0.065677688 | Over expressed |
| XM_027961244.1 | 2.910420316 | 0.022772139 | Over expressed |
| XM_004018522.3 | 2.90866814  | 0.01330496  | Over expressed |
| XM_015100117.2 | 2.906903763 | 0.015923826 | Over expressed |
| XM_027973217.1 | 2.89848384  | 0.000638215 | Over expressed |
| XM_027975307.1 | 2.896358734 | 0.005239998 | Over expressed |
| XM_027958867.1 | 2.888864719 | 0.114700133 | Over expressed |
| XM_015097574.2 | 2.887451412 | 0.130933705 | Over expressed |

|                |             |             |                |
|----------------|-------------|-------------|----------------|
| XM_027968702.1 | 2.887022703 | 0.002254399 | Over expressed |
| XM_027966134.1 | 2.885192155 | 0.004183811 | Over expressed |
| XM_027966794.1 | 2.882859171 | 0.007127445 | Over expressed |
| XM_015096020.2 | 2.882553083 | 0.006047766 | Over expressed |
| XM_027970661.1 | 2.880087944 | 0.004790066 | Over expressed |
| XM_027960607.1 | 2.87760216  | 0.089666148 | Over expressed |
| XM_027960275.1 | 2.87073394  | 0.000731727 | Over expressed |
| XM_027961894.1 | 2.869344113 | 1.60E-05    | Over expressed |
| XM_027966076.1 | 2.868232161 | 0.090115683 | Over expressed |
| XM_027979321.1 | 2.859805092 | 0.119033215 | Over expressed |
| XM_027960238.1 | 2.859530154 | 0.001049084 | Over expressed |
| XM_027959493.1 | 2.857730234 | 0.000782958 | Over expressed |
| XM_027961218.1 | 2.854505574 | 0.057416218 | Over expressed |
| XM_027979708.1 | 2.837583468 | 3.40E-07    | Over expressed |
| XM_004018807.4 | 2.836494567 | 0.03639558  | Over expressed |
| XM_027967513.1 | 2.83529806  | 0.007234519 | Over expressed |
| XR_003591021.1 | 2.83173233  | 0.063617621 | Over expressed |
| XM_027976014.1 | 2.823523946 | 0.041008729 | Over expressed |
| XM_004013064.4 | 2.823377084 | 0.000163787 | Over expressed |
| XM_027968119.1 | 2.821517607 | 0.044142627 | Over expressed |
| XM_027967273.1 | 2.813180646 | 0.038093593 | Over expressed |
| NR_107879.1    | 2.799555352 | 0.000253302 | Over expressed |
| XM_027962101.1 | 2.798239049 | 0.139185896 | Over expressed |
| XM_015096951.2 | 2.785650022 | 0.125601875 | Over expressed |
| XR_003590830.1 | 2.783546282 | 0.086765688 | Over expressed |
| XM_015103513.2 | 2.782109269 | 4.89E-08    | Over expressed |
| XM_027973386.1 | 2.78135727  | 0.001928158 | Over expressed |
| XM_004008418.4 | 2.775540574 | 0.008383677 | Over expressed |
| XM_004020697.4 | 2.76623257  | 0.019823259 | Over expressed |
| XR_003588776.1 | 2.765447032 | 0.016999286 | Over expressed |
| XR_003591637.1 | 2.765165023 | 0.004225515 | Over expressed |
| XM_027966111.1 | 2.758164175 | 0.02762261  | Over expressed |
| XM_027969354.1 | 2.756632066 | 0.005553335 | Over expressed |
| XR_001043674.3 | 2.756291327 | 0.022395235 | Over expressed |
| XM_027956560.1 | 2.754781798 | 0.043621124 | Over expressed |
| XM_027978643.1 | 2.7536356   | 0.045713802 | Over expressed |
| XR_003588086.1 | 2.752438125 | 0.001859641 | Over expressed |
| XM_027969370.1 | 2.740690362 | 3.03E-06    | Over expressed |
| XM_027974044.1 | 2.73949069  | 0.000146787 | Over expressed |
| XM_027977587.1 | 2.737145298 | 0.005145597 | Over expressed |
| XM_027965631.1 | 2.733713511 | 1.42E-06    | Over expressed |
| XM_027970422.1 | 2.73314546  | 4.59E-08    | Over expressed |
| NM_001146271.1 | 2.731605984 | 0.137930188 | Over expressed |
| XM_027975786.1 | 2.730680003 | 0.014992707 | Over expressed |

|                |             |             |                |
|----------------|-------------|-------------|----------------|
| XM_027971542.1 | 2.729870519 | 0.074093987 | Over expressed |
| XM_012126973.3 | 2.729634591 | 0.000716358 | Over expressed |
| XM_027961366.1 | 2.724082427 | 0.006440947 | Over expressed |
| XM_027956747.1 | 2.70821738  | 0.019881571 | Over expressed |
| XM_027956931.1 | 2.707915466 | 7.78E-05    | Over expressed |
| XM_027966096.1 | 2.705275115 | 0.002349699 | Over expressed |
| XM_027968308.1 | 2.702425847 | 0.000883136 | Over expressed |
| XM_012181723.2 | 2.695791064 | 0.000518102 | Over expressed |
| XM_027975869.1 | 2.691790734 | 0.00220499  | Over expressed |
| XM_027960831.1 | 2.685181699 | 0.000494728 | Over expressed |
| XM_027977585.1 | 2.682595222 | 0.05267501  | Over expressed |
| XM_027968219.1 | 2.670759978 | 0.077415236 | Over expressed |
| XM_027967570.1 | 2.669630686 | 9.65E-05    | Over expressed |
| XM_027973447.1 | 2.669096315 | 0.004889329 | Over expressed |
| XM_027976407.1 | 2.665575773 | 0.029556502 | Over expressed |
| XM_015100100.2 | 2.663830946 | 0.008713435 | Over expressed |
| XM_027969609.1 | 2.66111258  | 0.025814029 | Over expressed |
| XM_027978142.1 | 2.658845318 | 0.14187072  | Over expressed |
| XM_015103987.2 | 2.652461638 | 0.090169349 | Over expressed |
| XM_027968094.1 | 2.650821652 | 0.068437798 | Over expressed |
| XM_027966395.1 | 2.649219502 | 0.004344478 | Over expressed |
| XM_027966405.1 | 2.646299701 | 0.010297484 | Over expressed |
| XR_003587196.1 | 2.642420946 | 0.001130604 | Over expressed |
| XM_027978826.1 | 2.636107495 | 1.31E-06    | Over expressed |
| XM_027979470.1 | 2.633306831 | 0.080309947 | Over expressed |
| XM_004003498.4 | 2.626418661 | 0.012910881 | Over expressed |
| XM_027967025.1 | 2.6257846   | 0.000214732 | Over expressed |
| XM_012186335.3 | 2.624719468 | 0.000171935 | Over expressed |
| XM_027969854.1 | 2.622925046 | 0.074207643 | Over expressed |
| XM_027957886.1 | 2.61445661  | 5.95E-05    | Over expressed |
| XM_004019223.4 | 2.612661592 | 0.001910145 | Over expressed |
| XM_027959377.1 | 2.607454961 | 0.000195064 | Over expressed |
| XM_027964670.1 | 2.607283961 | 0.066753208 | Over expressed |
| XM_027969394.1 | 2.602914335 | 0.004233853 | Over expressed |
| XM_015093830.2 | 2.601762699 | 0.00617518  | Over expressed |
| XM_027975553.1 | 2.600795078 | 7.50E-10    | Over expressed |
| XM_027959710.1 | 2.589426171 | 0.000765534 | Over expressed |
| XM_027956932.1 | 2.587207843 | 0.007407886 | Over expressed |
| XM_027959275.1 | 2.583744456 | 0.131199935 | Over expressed |
| XM_027976938.1 | 2.577349698 | 0.011352421 | Over expressed |
| XM_027970135.1 | 2.573349936 | 0.00372592  | Over expressed |
| XM_012185609.2 | 2.570148815 | 0.010154235 | Over expressed |
| XM_027978778.1 | 2.570013545 | 0.0134182   | Over expressed |
| XM_027956807.1 | 2.567795878 | 0.026896125 | Over expressed |

|                |             |             |                |
|----------------|-------------|-------------|----------------|
| XM_027969853.1 | 2.558179861 | 0.137339498 | Over expressed |
| XM_027971608.1 | 2.555471876 | 0.099922906 | Over expressed |
| XM_015097366.2 | 2.5502416   | 0.000615929 | Over expressed |
| XM_027957465.1 | 2.550104854 | 0.001235093 | Over expressed |
| XM_027968435.1 | 2.548301106 | 0.077737502 | Over expressed |
| XM_027956431.1 | 2.546876046 | 0.130933705 | Over expressed |
| XM_027966079.1 | 2.546618454 | 3.20E-05    | Over expressed |
| NM_001009406.1 | 2.544315126 | 0.084518502 | Over expressed |
| XM_027965473.1 | 2.544010039 | 0.041978419 | Over expressed |
| XM_027967120.1 | 2.540128074 | 0.043063167 | Over expressed |
| XM_015095851.2 | 2.53980863  | 0.020417913 | Over expressed |
| XM_027962394.1 | 2.539329036 | 0.017658529 | Over expressed |
| XM_015095798.2 | 2.536574858 | 0.012538451 | Over expressed |
| XM_015101052.2 | 2.535271603 | 0.015161941 | Over expressed |
| XM_027961278.1 | 2.532797422 | 0.003335178 | Over expressed |
| XM_027961706.1 | 2.528416814 | 3.05E-10    | Over expressed |
| XM_004002319.4 | 2.518621372 | 0.063294169 | Over expressed |
| XM_027979520.1 | 2.518010054 | 0.102718375 | Over expressed |
| XM_027975794.1 | 2.514953251 | 0.004544186 | Over expressed |
| XM_027972755.1 | 2.512488301 | 0.032525901 | Over expressed |
| XM_015099797.2 | 2.507231125 | 2.99E-05    | Over expressed |
| XM_027976122.1 | 2.506882517 | 0.05098375  | Over expressed |
| XM_015092224.2 | 2.502790416 | 0.006025018 | Over expressed |
| XM_027969393.1 | 2.500824574 | 0.014474016 | Over expressed |
| NM_001166186.1 | 2.499720198 | 0.000643223 | Over expressed |
| XM_012119517.3 | 2.498561863 | 0.018741233 | Over expressed |
| XM_015100809.2 | 2.49584364  | 0.043394599 | Over expressed |
| XM_027962044.1 | 2.493598715 | 0.001044745 | Over expressed |
| XM_012095319.3 | 2.493548751 | 0.004704199 | Over expressed |
| XM_027959501.1 | 2.487577131 | 0.012306933 | Over expressed |
| XM_004002526.4 | 2.487568436 | 0.013794559 | Over expressed |
| XM_027963649.1 | 2.480011403 | 0.095422899 | Over expressed |
| XM_027957483.1 | 2.47906451  | 0.10869922  | Over expressed |
| XM_027958821.1 | 2.478422585 | 0.00010221  | Over expressed |
| XM_027956921.1 | 2.476013352 | 0.021353308 | Over expressed |
| XM_027960379.1 | 2.475264902 | 0.02580157  | Over expressed |
| XM_027970695.1 | 2.473092063 | 0.093867612 | Over expressed |
| XM_027974100.1 | 2.470740296 | 0.06585707  | Over expressed |
| XM_012098057.3 | 2.469094435 | 0.000467742 | Over expressed |
| XM_027957473.1 | 2.468123186 | 0.01454658  | Over expressed |
| XM_004003400.4 | 2.466165367 | 0.005621843 | Over expressed |
| XR_003588680.1 | 2.46297987  | 0.063641717 | Over expressed |
| XM_012174208.3 | 2.461530253 | 0.094373585 | Over expressed |
| XM_027956942.1 | 2.460498763 | 0.021436219 | Over expressed |

|                |             |             |                |
|----------------|-------------|-------------|----------------|
| XM_027966066.1 | 2.458901557 | 0.020033532 | Over expressed |
| XM_004005704.3 | 2.458333829 | 0.088004748 | Over expressed |
| XM_004003720.4 | 2.45745536  | 0.099593916 | Over expressed |
| XR_001436150.2 | 2.457397421 | 0.127532501 | Over expressed |
| XM_027969185.1 | 2.457112378 | 0.135789221 | Over expressed |
| XM_027959284.1 | 2.453829888 | 0.026292077 | Over expressed |
| XM_027957549.1 | 2.450317423 | 0.000153308 | Over expressed |
| XM_027967278.1 | 2.444407344 | 0.119309115 | Over expressed |
| XM_012095497.2 | 2.4442692   | 0.096997656 | Over expressed |
| XM_027977440.1 | 2.443089592 | 0.037456646 | Over expressed |
| XM_027959549.1 | 2.442241007 | 0.00090475  | Over expressed |
| XM_004023292.4 | 2.441461087 | 0.006047766 | Over expressed |
| XM_027975742.1 | 2.440695472 | 0.051076808 | Over expressed |
| XM_004008537.3 | 2.440200747 | 0.021244802 | Over expressed |
| XM_027959859.1 | 2.437913628 | 0.046479751 | Over expressed |
| XM_012179247.3 | 2.437288618 | 0.057423749 | Over expressed |
| XM_027972813.1 | 2.429887711 | 0.04129278  | Over expressed |
| XM_027961466.1 | 2.424210503 | 0.011448767 | Over expressed |
| XM_004019661.4 | 2.423697067 | 0.016718906 | Over expressed |
| XM_027956777.1 | 2.420062496 | 0.002595607 | Over expressed |
| XM_027966078.1 | 2.414417421 | 0.12875644  | Over expressed |
| XM_027978858.1 | 2.412392263 | 0.017307158 | Over expressed |
| XM_004006276.4 | 2.411268238 | 0.120191014 | Over expressed |
| XM_012190204.3 | 2.410821664 | 0.075520292 | Over expressed |
| XM_027969607.1 | 2.410091776 | 0.004848344 | Over expressed |
| XM_027957834.1 | 2.407675828 | 0.03942363  | Over expressed |
| XM_027956739.1 | 2.407031904 | 4.52E-07    | Over expressed |
| XM_027969623.1 | 2.403632451 | 0.000943714 | Over expressed |
| XM_027977058.1 | 2.403114761 | 0.098828365 | Over expressed |
| XR_003588572.1 | 2.401376742 | 0.080643936 | Over expressed |
| XM_012181011.3 | 2.396841902 | 0.001129342 | Over expressed |
| XM_027973437.1 | 2.396378178 | 0.065677688 | Over expressed |
| XM_015102394.2 | 2.38552954  | 0.042776766 | Over expressed |
| XM_027964402.1 | 2.384933437 | 0.008154444 | Over expressed |
| XM_027974424.1 | 2.383069162 | 3.20E-05    | Over expressed |
| XM_015102960.2 | 2.383018034 | 3.33E-13    | Over expressed |
| XM_027973425.1 | 2.380051486 | 0.000669454 | Over expressed |
| XM_027961911.1 | 2.377987376 | 0.082930467 | Over expressed |
| XM_027959492.1 | 2.376703051 | 0.012639426 | Over expressed |
| XM_027960010.1 | 2.375171489 | 0.092805918 | Over expressed |
| XM_004005022.4 | 2.371437897 | 0.115568862 | Over expressed |
| XM_027976232.1 | 2.371151518 | 0.003456153 | Over expressed |
| XM_027967976.1 | 2.369975569 | 0.010789577 | Over expressed |
| XM_027968311.1 | 2.366002908 | 2.13E-08    | Over expressed |

|                |             |             |                |
|----------------|-------------|-------------|----------------|
| XM_012180575.3 | 2.365073939 | 0.117748156 | Over expressed |
| NM_001009396.1 | 2.364726445 | 0.027450454 | Over expressed |
| XM_027959402.1 | 2.363316307 | 1.19E-16    | Over expressed |
| XM_027969608.1 | 2.358427653 | 4.21E-05    | Over expressed |
| XM_027963874.1 | 2.355284344 | 0.029126185 | Over expressed |
| XM_027975793.1 | 2.352723242 | 0.009939424 | Over expressed |
| XM_027974126.1 | 2.352491732 | 2.10E-09    | Over expressed |
| XM_027961057.1 | 2.351360906 | 0.000195064 | Over expressed |
| XM_004018462.4 | 2.350119683 | 0.015139536 | Over expressed |
| XM_004020916.4 | 2.347963882 | 0.008201946 | Over expressed |
| XM_004013122.4 | 2.345847619 | 0.001316152 | Over expressed |
| XR_003590635.1 | 2.345786907 | 0.017741268 | Over expressed |
| XM_027978383.1 | 2.341988349 | 0.01953568  | Over expressed |
| XM_004022782.4 | 2.341176549 | 0.000168012 | Over expressed |
| XM_012182573.3 | 2.339896547 | 0.040686494 | Over expressed |
| XM_027959472.1 | 2.338689857 | 0.010209275 | Over expressed |
| XM_027963647.1 | 2.335578392 | 0.011286072 | Over expressed |
| XM_027978058.1 | 2.33507815  | 0.010154235 | Over expressed |
| XM_027957286.1 | 2.334331788 | 0.005610556 | Over expressed |
| XM_027966315.1 | 2.334225673 | 0.00211852  | Over expressed |
| NM_001161882.1 | 2.330966393 | 0.00115211  | Over expressed |
| XM_027974935.1 | 2.329931385 | 0.127925516 | Over expressed |
| XM_027964067.1 | 2.328803733 | 4.44E-05    | Over expressed |
| XR_003587307.1 | 2.326570352 | 0.04748622  | Over expressed |
| XM_004006731.4 | 2.323433234 | 0.022689947 | Over expressed |
| XM_027957159.1 | 2.32116493  | 0.141812568 | Over expressed |
| XM_004002523.3 | 2.318775426 | 0.003224408 | Over expressed |
| XR_001435313.2 | 2.31658634  | 3.27E-05    | Over expressed |
| XM_027966091.1 | 2.315628493 | 0.045359478 | Over expressed |
| XM_027971296.1 | 2.315132631 | 0.000492242 | Over expressed |
| XM_027959995.1 | 2.313443978 | 0.006964631 | Over expressed |
| XM_027964022.1 | 2.312108502 | 0.027783282 | Over expressed |
| XM_027978428.1 | 2.311555919 | 3.05E-11    | Over expressed |
| XM_027956832.1 | 2.307156243 | 0.002524519 | Over expressed |
| XM_027970144.1 | 2.305198909 | 2.45E-07    | Over expressed |
| XM_027961856.1 | 2.304614664 | 0.064852056 | Over expressed |
| XM_004017391.4 | 2.297062971 | 0.008027201 | Over expressed |
| XM_015093628.2 | 2.290885024 | 0.117931714 | Over expressed |
| XM_012177833.3 | 2.290637097 | 0.000412032 | Over expressed |
| XM_027968239.1 | 2.288906186 | 0.032051653 | Over expressed |
| XR_003590599.1 | 2.286790169 | 2.29E-05    | Over expressed |
| XM_015098536.2 | 2.282715018 | 0.000412032 | Over expressed |
| XM_027966184.1 | 2.281940431 | 0.087207655 | Over expressed |
| XM_015097989.2 | 2.281494361 | 0.013372331 | Over expressed |

|                |             |             |                |
|----------------|-------------|-------------|----------------|
| XM_004008600.4 | 2.281379681 | 0.061571085 | Over expressed |
| XM_004015420.3 | 2.280941267 | 0.03417323  | Over expressed |
| XM_027974087.1 | 2.279822953 | 0.12197309  | Over expressed |
| XM_027959151.1 | 2.275736575 | 1.02E-05    | Over expressed |
| XM_027967913.1 | 2.275213093 | 0.115218779 | Over expressed |
| XM_015103999.2 | 2.271102767 | 0.000258475 | Over expressed |
| XM_027957148.1 | 2.271091842 | 0.000138193 | Over expressed |
| XM_015104523.2 | 2.269745195 | 0.048171702 | Over expressed |
| XM_015101063.2 | 2.268512393 | 0.001262701 | Over expressed |
| XM_027969548.1 | 2.268149483 | 0.001305023 | Over expressed |
| XM_004012518.4 | 2.265480504 | 0.071949208 | Over expressed |
| XM_027976883.1 | 2.263607286 | 0.03195564  | Over expressed |
| XM_027961436.1 | 2.256927571 | 0.00488154  | Over expressed |
| NM_001252177.2 | 2.254209348 | 0.02030149  | Over expressed |
| XM_004018960.4 | 2.251344623 | 0.103654233 | Over expressed |
| XM_027972867.1 | 2.25102014  | 1.15E-06    | Over expressed |
| XM_027956924.1 | 2.247232934 | 7.67E-05    | Over expressed |
| XM_027968016.1 | 2.247057809 | 0.104824887 | Over expressed |
| XR_001024822.3 | 2.243405686 | 0.005761197 | Over expressed |
| XM_027957476.1 | 2.243136857 | 0.043359338 | Over expressed |
| XR_001023556.3 | 2.240502277 | 0.068437798 | Over expressed |
| XM_027959386.1 | 2.240294093 | 0.001952713 | Over expressed |
| XM_004012823.3 | 2.238373836 | 0.020613284 | Over expressed |
| XM_027960962.1 | 2.236791281 | 0.029824081 | Over expressed |
| XM_027963743.1 | 2.235331069 | 0.045730072 | Over expressed |
| XM_004023408.4 | 2.234850086 | 0.000430463 | Over expressed |
| XM_027956949.1 | 2.233229274 | 0.00508936  | Over expressed |
| XM_004005593.4 | 2.231020081 | 0.001694704 | Over expressed |
| XM_027957492.1 | 2.228687745 | 0.022546466 | Over expressed |
| XM_027969518.1 | 2.227853909 | 0.021464107 | Over expressed |
| XM_027966080.1 | 2.227764261 | 0.000216684 | Over expressed |
| XM_027974676.1 | 2.225001246 | 0.000725919 | Over expressed |
| XM_027957563.1 | 2.224887685 | 0.060390695 | Over expressed |
| XM_012102126.2 | 2.222433729 | 0.000176042 | Over expressed |
| XM_027978897.1 | 2.221670586 | 0.001775269 | Over expressed |
| XM_027968066.1 | 2.216190045 | 0.002474541 | Over expressed |
| XM_004008602.4 | 2.215628202 | 0.060934593 | Over expressed |
| XR_003589107.1 | 2.210401229 | 0.133324457 | Over expressed |
| XM_012095332.3 | 2.208809247 | 0.140434525 | Over expressed |
| XM_027956872.1 | 2.207021842 | 0.000113932 | Over expressed |
| XM_027976870.1 | 2.204683132 | 0.000731727 | Over expressed |
| XM_027978233.1 | 2.204682888 | 0.002923544 | Over expressed |
| XM_015095733.2 | 2.199070898 | 1.08E-06    | Over expressed |
| XR_003589889.1 | 2.19888506  | 0.063617621 | Over expressed |

|                |             |             |                |
|----------------|-------------|-------------|----------------|
| XM_027974080.1 | 2.198631647 | 0.000632757 | Over expressed |
| XM_012104345.3 | 2.197666116 | 0.000262429 | Over expressed |
| XM_027959506.1 | 2.197447098 | 7.45E-07    | Over expressed |
| XM_027965758.1 | 2.196500879 | 0.054921606 | Over expressed |
| XM_027966003.1 | 2.193065447 | 0.105513473 | Over expressed |
| XM_027957597.1 | 2.192497734 | 0.007275229 | Over expressed |
| NM_001009429.1 | 2.187474182 | 0.142280067 | Over expressed |
| XM_004016051.4 | 2.187287417 | 0.142393907 | Over expressed |
| XM_027965629.1 | 2.186451728 | 0.013262645 | Over expressed |
| XM_027956558.1 | 2.186143017 | 0.000521269 | Over expressed |
| XM_027959797.1 | 2.183898746 | 0.012421174 | Over expressed |
| XR_003590597.1 | 2.182956806 | 0.024242344 | Over expressed |
| XM_027977200.1 | 2.180709551 | 0.012386965 | Over expressed |
| XR_001030067.3 | 2.180300819 | 0.081834057 | Over expressed |
| XM_027958855.1 | 2.180017364 | 0.130933705 | Over expressed |
| XR_003586251.1 | 2.178704801 | 0.120153508 | Over expressed |
| XM_015098906.2 | 2.171702671 | 0.011190743 | Over expressed |
| XR_003590726.1 | 2.170934934 | 0.04821245  | Over expressed |
| XM_004021001.3 | 2.167029897 | 0.030579045 | Over expressed |
| XM_027978472.1 | 2.164997405 | 0.073745649 | Over expressed |
| XM_027967668.1 | 2.164165205 | 0.110074099 | Over expressed |
| XM_027970217.1 | 2.159051858 | 0.000130615 | Over expressed |
| XM_027974271.1 | 2.158110586 | 0.000921468 | Over expressed |
| XM_027959850.1 | 2.156302315 | 0.004642387 | Over expressed |
| XM_027974179.1 | 2.152443033 | 0.137042147 | Over expressed |
| NM_001134308.1 | 2.151727328 | 0.017406573 | Over expressed |
| NM_001161869.1 | 2.149126625 | 0.001711775 | Over expressed |
| XM_004017084.3 | 2.148350055 | 0.007131201 | Over expressed |
| XM_027966112.1 | 2.144784901 | 0.000820085 | Over expressed |
| XM_012158642.3 | 2.144203348 | 0.056963038 | Over expressed |
| XM_027974993.1 | 2.141083501 | 0.116245729 | Over expressed |
| XM_027971076.1 | 2.140437507 | 0.04270552  | Over expressed |
| XM_027966106.1 | 2.136209087 | 0.009070639 | Over expressed |
| NM_001035224.1 | 2.130387672 | 0.130265711 | Over expressed |
| XM_012190732.3 | 2.128003722 | 0.045369055 | Over expressed |
| XM_027969869.1 | 2.125483326 | 0.021481972 | Over expressed |
| XM_027966600.1 | 2.125017079 | 0.017793199 | Over expressed |
| XR_003589379.1 | 2.123746822 | 0.113299773 | Over expressed |
| XM_027958093.1 | 2.122369043 | 0.093513871 | Over expressed |
| XM_027968940.1 | 2.121860604 | 0.098453336 | Over expressed |
| XM_015102172.2 | 2.119671025 | 0.001454395 | Over expressed |
| XM_027973593.1 | 2.118923686 | 9.75E-06    | Over expressed |
| XM_027975635.1 | 2.11647379  | 0.130540181 | Over expressed |
| XM_027959959.1 | 2.115964804 | 0.081423408 | Over expressed |



|                |             |             |                |
|----------------|-------------|-------------|----------------|
| XM_027966378.1 | 2.114121113 | 0.002680482 | Over expressed |
| XM_015105278.2 | 2.1128905   | 0.009333354 | Over expressed |
| XM_027974279.1 | 2.109866618 | 0.061431822 | Over expressed |
| XM_027970191.1 | 2.109626138 | 0.011815879 | Over expressed |
| XM_015100161.2 | 2.109211716 | 0.013166229 | Over expressed |
| XM_027978340.1 | 2.107992658 | 0.080659293 | Over expressed |
| XM_027961270.1 | 2.105164279 | 0.004630032 | Over expressed |
| XM_027961465.1 | 2.100729877 | 0.030997269 | Over expressed |
| XM_027957446.1 | 2.100359741 | 0.006836925 | Over expressed |
| XM_027969338.1 | 2.10013364  | 1.20E-11    | Over expressed |
| XM_027969610.1 | 2.098732917 | 0.000293771 | Over expressed |
| XM_004018410.3 | 2.097733752 | 0.019206715 | Over expressed |
| XM_027961144.1 | 2.095123982 | 0.009560257 | Over expressed |
| XM_027977160.1 | 2.094337987 | 0.045256103 | Over expressed |
| XM_004015082.4 | 2.092976257 | 0.011394995 | Over expressed |
| XM_027959672.1 | 2.092760509 | 0.039893983 | Over expressed |
| XM_012174798.3 | 2.092253529 | 0.007413789 | Over expressed |
| NM_001009319.2 | 2.090403885 | 0.015994314 | Over expressed |
| XM_004005644.4 | 2.089773215 | 0.004976659 | Over expressed |
| XM_027969707.1 | 2.088867834 | 0.148620498 | Over expressed |
| XM_027979802.1 | 2.088387888 | 0.09194277  | Over expressed |
| XM_004001806.4 | 2.086665259 | 1.98E-05    | Over expressed |
| XM_027969367.1 | 2.082940741 | 1.78E-14    | Over expressed |
| XM_012103924.2 | 2.082839368 | 0.000924237 | Over expressed |
| XM_027974212.1 | 2.080896055 | 7.55E-07    | Over expressed |
| XM_027956943.1 | 2.078714915 | 0.079710872 | Over expressed |
| XM_004006376.4 | 2.075711198 | 0.000924016 | Over expressed |
| XM_027974190.1 | 2.074059902 | 0.104618029 | Over expressed |
| XM_027959593.1 | 2.073927308 | 0.001559245 | Over expressed |
| XM_004019615.4 | 2.073535323 | 0.000996364 | Over expressed |
| XM_027965225.1 | 2.073180772 | 0.007163966 | Over expressed |
| XM_004005271.3 | 2.071571171 | 0.027480359 | Over expressed |
| XM_027977340.1 | 2.069318718 | 0.003835012 | Over expressed |
| NM_001162552.1 | 2.067924914 | 0.006130053 | Over expressed |
| XM_004012486.3 | 2.065220024 | 0.004225515 | Over expressed |
| XM_027971264.1 | 2.063496465 | 0.014711053 | Over expressed |
| XM_027977447.1 | 2.06240144  | 0.063641717 | Over expressed |
| XM_027975637.1 | 2.060840056 | 0.009671194 | Over expressed |
| XM_004022127.4 | 2.060809586 | 0.041973645 | Over expressed |
| XM_027961046.1 | 2.059968586 | 0.027637143 | Over expressed |
| XM_027974025.1 | 2.05524645  | 8.15E-10    | Over expressed |
| XM_027960288.1 | 2.050292263 | 0.035200575 | Over expressed |
| NM_001105261.1 | 2.049412325 | 0.035485701 | Over expressed |
| XR_003590639.1 | 2.048313589 | 0.027866223 | Over expressed |

|                |             |             |                |
|----------------|-------------|-------------|----------------|
| XM_012102025.3 | 2.047779003 | 0.046917179 | Over expressed |
| XM_004005098.4 | 2.047319436 | 0.085845743 | Over expressed |
| XM_027978401.1 | 2.043112349 | 0.027192005 | Over expressed |
| XM_012102192.3 | 2.039105032 | 0.000814822 | Over expressed |
| XM_027961829.1 | 2.037073754 | 0.004594698 | Over expressed |
| XM_004015465.4 | 2.036257044 | 0.051563883 | Over expressed |
| XM_027973355.1 | 2.0362261   | 0.002922056 | Over expressed |
| XM_027976121.1 | 2.032803774 | 0.030216242 | Over expressed |
| XM_004020924.3 | 2.031524836 | 0.05070529  | Over expressed |
| XM_004008511.3 | 2.02951902  | 0.001406393 | Over expressed |
| XR_003590770.1 | 2.029350165 | 0.026699482 | Over expressed |
| XM_027975042.1 | 2.027466524 | 0.01556651  | Over expressed |
| XM_027961472.1 | 2.026533446 | 0.023350651 | Over expressed |
| NM_001308574.1 | 2.026041832 | 0.027366442 | Over expressed |
| XM_027969284.1 | 2.025830912 | 0.008234738 | Over expressed |
| XM_004014614.4 | 2.025482227 | 0.121259282 | Over expressed |
| XM_004008468.4 | 2.023178919 | 0.022602338 | Over expressed |
| XM_015100063.2 | 2.021891828 | 0.070747668 | Over expressed |
| XM_027980283.1 | 2.017374085 | 0.001689254 | Over expressed |
| XM_004006304.4 | 2.017270393 | 5.88E-06    | Over expressed |
| XM_004010350.4 | 2.016887457 | 0.005199432 | Over expressed |
| XR_003590125.1 | 2.015944362 | 0.10202281  | Over expressed |
| XM_027974316.1 | 2.011331869 | 0.004828293 | Over expressed |
| XM_004008775.4 | 2.010090302 | 0.002853833 | Over expressed |
| NM_001012341.1 | 2.006206177 | 0.015738733 | Over expressed |
| XM_012103012.3 | 2.006046224 | 0.01380001  | Over expressed |
| XM_027974978.1 | 2.005544156 | 0.055677671 | Over expressed |
| XM_027970396.1 | 2.003410689 | 0.024259214 | Over expressed |
| XM_027979276.1 | 2.000945713 | 0.096559574 | Over expressed |
| XM_012183465.2 | 2.00010099  | 0.012150769 | Over expressed |
| XM_027959471.1 | 1.999728962 | 0.0303893   | Over expressed |
| XM_027967308.1 | 1.998977907 | 0.004119139 | Over expressed |
| XM_027977535.1 | 1.997794907 | 0.000782958 | Over expressed |
| XM_027961828.1 | 1.996114737 | 0.001952713 | Over expressed |
| XM_027959152.1 | 1.99443362  | 0.000274553 | Over expressed |
| XM_027956706.1 | 1.990771994 | 0.056591949 | Over expressed |
| XM_027957868.1 | 1.990115418 | 0.072405437 | Over expressed |
| XM_027961208.1 | 1.990020156 | 0.028801284 | Over expressed |
| XR_003586475.1 | 1.988892215 | 0.018304547 | Over expressed |
| XM_027963297.1 | 1.987036757 | 0.014921056 | Over expressed |
| XM_027961874.1 | 1.98682875  | 0.044142776 | Over expressed |
| XM_027978839.1 | 1.98603889  | 0.071936565 | Over expressed |
| XM_004008427.4 | 1.984313897 | 0.000413203 | Over expressed |
| XM_012111094.3 | 1.983688309 | 0.015017327 | Over expressed |

|                |             |             |                |
|----------------|-------------|-------------|----------------|
| XM_012169242.2 | 1.982215281 | 0.013002218 | Over expressed |
| XM_027958660.1 | 1.980976248 | 0.006077065 | Over expressed |
| XR_003588546.1 | 1.979706154 | 0.005249634 | Over expressed |
| XM_027956445.1 | 1.9790844   | 0.000598911 | Over expressed |
| XM_027960009.1 | 1.977189397 | 0.031146204 | Over expressed |
| XM_004022778.3 | 1.976028424 | 0.001136631 | Over expressed |
| XM_027961272.1 | 1.974968535 | 0.00295007  | Over expressed |
| XM_004013065.4 | 1.972978552 | 0.028743102 | Over expressed |
| XM_027978234.1 | 1.971259165 | 0.008864064 | Over expressed |
| XM_012169237.3 | 1.971091026 | 0.004848344 | Over expressed |
| XM_027956916.1 | 1.969046804 | 0.008504815 | Over expressed |
| XM_015095576.2 | 1.967228165 | 0.040447863 | Over expressed |
| XM_027967225.1 | 1.966680719 | 0.068243233 | Over expressed |
| XM_027966627.1 | 1.963896074 | 0.057233625 | Over expressed |
| XM_027966310.1 | 1.961106917 | 0.006326504 | Over expressed |
| XM_004023592.4 | 1.959293269 | 0.073150133 | Over expressed |
| XM_027976238.1 | 1.958769218 | 0.098471359 | Over expressed |
| XM_027976335.1 | 1.957592476 | 0.083622691 | Over expressed |
| XM_015101737.2 | 1.95736534  | 0.001205496 | Over expressed |
| XM_027975638.1 | 1.955178886 | 0.011386162 | Over expressed |
| XM_027959998.1 | 1.953032921 | 0.123593076 | Over expressed |
| XM_012102093.2 | 1.952981761 | 0.051021572 | Over expressed |
| XM_027979041.1 | 1.951756791 | 0.066811816 | Over expressed |
| XM_012117934.3 | 1.951018952 | 0.047825491 | Over expressed |
| XM_027966402.1 | 1.950335377 | 0.009045651 | Over expressed |
| XM_027974127.1 | 1.950299718 | 0.010209275 | Over expressed |
| XM_004008760.3 | 1.947905865 | 0.033993234 | Over expressed |
| XM_027957787.1 | 1.947527018 | 5.29E-06    | Over expressed |
| XM_004019672.4 | 1.946785038 | 0.005677224 | Over expressed |
| XM_004005870.4 | 1.946652679 | 0.005152304 | Over expressed |
| XM_027959273.1 | 1.945131817 | 0.001424413 | Over expressed |
| NM_001009287.1 | 1.944855209 | 0.143650048 | Over expressed |
| XM_027962802.1 | 1.943515602 | 0.02153044  | Over expressed |
| XM_004017842.4 | 1.943131439 | 0.026656617 | Over expressed |
| XM_015102223.2 | 1.943011304 | 0.00030712  | Over expressed |
| XM_004001759.3 | 1.942410156 | 0.003030019 | Over expressed |
| XM_004017737.3 | 1.942213425 | 0.002315763 | Over expressed |
| XM_027961445.1 | 1.942182808 | 0.052342651 | Over expressed |
| XM_027963524.1 | 1.94168303  | 0.145118602 | Over expressed |
| XM_027957880.1 | 1.941542817 | 0.028011135 | Over expressed |
| XM_004004394.4 | 1.941260689 | 0.02470076  | Over expressed |
| XM_004007051.3 | 1.937613986 | 0.000369034 | Over expressed |
| XM_027969397.1 | 1.936821463 | 0.001694704 | Over expressed |
| XM_027961484.1 | 1.934403889 | 0.079988329 | Over expressed |

|                |             |             |                |
|----------------|-------------|-------------|----------------|
| XM_004021776.4 | 1.934201442 | 2.74E-15    | Over expressed |
| XM_004003094.4 | 1.934166045 | 0.018061258 | Over expressed |
| XM_027960013.1 | 1.931937203 | 0.001134756 | Over expressed |
| XM_027961332.1 | 1.931898814 | 0.045290788 | Over expressed |
| XM_027973792.1 | 1.928397069 | 0.027039937 | Over expressed |
| XM_004022254.4 | 1.928360702 | 0.001977086 | Over expressed |
| XM_027957870.1 | 1.925110599 | 0.126095431 | Over expressed |
| XM_027961373.1 | 1.922753946 | 0.01953568  | Over expressed |
| XM_027968279.1 | 1.922556731 | 0.001933013 | Over expressed |
| XM_027959928.1 | 1.922313201 | 0.00295007  | Over expressed |
| XM_027976935.1 | 1.921433162 | 0.034011567 | Over expressed |
| XM_027970171.1 | 1.920769427 | 5.67E-06    | Over expressed |
| XM_012188069.3 | 1.920486581 | 0.035795462 | Over expressed |
| XM_027964040.1 | 1.920075532 | 6.83E-07    | Over expressed |
| XM_027976724.1 | 1.918066339 | 0.052211094 | Over expressed |
| XM_004002292.4 | 1.916537717 | 0.149734613 | Over expressed |
| XM_012175625.3 | 1.915160704 | 0.026396168 | Over expressed |
| XM_015102889.2 | 1.910971048 | 5.70E-05    | Over expressed |
| XM_004015685.4 | 1.908604667 | 0.005349469 | Over expressed |
| XR_003588756.1 | 1.90813719  | 0.134808642 | Over expressed |
| XM_027965744.1 | 1.907793751 | 0.00338515  | Over expressed |
| XM_027958611.1 | 1.907492046 | 0.054640495 | Over expressed |
| XM_027959994.1 | 1.907481785 | 0.117301299 | Over expressed |
| XR_003590614.1 | 1.907160544 | 0.022452826 | Over expressed |
| XM_027967221.1 | 1.907112263 | 0.006025018 | Over expressed |
| XM_004023656.4 | 1.906858751 | 0.015738733 | Over expressed |
| XM_027962060.1 | 1.904571093 | 0.008616488 | Over expressed |
| XM_027969569.1 | 1.902869796 | 0.015344598 | Over expressed |
| XM_015097618.2 | 1.900175147 | 0.116970127 | Over expressed |
| XM_015103179.2 | 1.899369886 | 0.002558817 | Over expressed |
| XM_027960677.1 | 1.895468336 | 0.001274938 | Over expressed |
| XM_027963314.1 | 1.895440427 | 0.005643499 | Over expressed |
| XM_027973168.1 | 1.895276769 | 0.021020478 | Over expressed |
| XM_027957907.1 | 1.894601571 | 0.00012736  | Over expressed |
| XM_015103984.2 | 1.892241388 | 0.029089452 | Over expressed |
| XM_004014961.4 | 1.891580581 | 1.21E-05    | Over expressed |
| XM_012158304.2 | 1.891224924 | 0.005339784 | Over expressed |
| XM_027969913.1 | 1.889286124 | 0.075015492 | Over expressed |
| XM_027956914.1 | 1.888024549 | 0.021448748 | Over expressed |
| XM_012104341.3 | 1.888023414 | 0.003243995 | Over expressed |
| XM_012190632.3 | 1.887349265 | 0.018156716 | Over expressed |
| XM_027978940.1 | 1.886662288 | 0.001372545 | Over expressed |
| XM_004005617.4 | 1.885364422 | 0.016899885 | Over expressed |
| XM_027969312.1 | 1.885212556 | 0.101580157 | Over expressed |

|                |             |             |                |
|----------------|-------------|-------------|----------------|
| XM_027978545.1 | 1.884319751 | 0.008805434 | Over expressed |
| XM_015094112.2 | 1.883525883 | 0.041056259 | Over expressed |
| XM_004012999.4 | 1.88222733  | 0.101580157 | Over expressed |
| XM_027969408.1 | 1.881841983 | 0.114734629 | Over expressed |
| XM_012187713.2 | 1.881399491 | 0.069323597 | Over expressed |
| XM_027961645.1 | 1.88131024  | 2.53E-06    | Over expressed |
| XM_027966364.1 | 1.880510814 | 4.29E-05    | Over expressed |
| XR_003585754.1 | 1.880352854 | 0.008681624 | Over expressed |
| XM_027969187.1 | 1.879867567 | 0.015923826 | Over expressed |
| XM_027966541.1 | 1.87937331  | 0.000109708 | Over expressed |
| XM_027957493.1 | 1.87804595  | 0.090061595 | Over expressed |
| XM_004019706.4 | 1.87790001  | 0.005643499 | Over expressed |
| XM_015100495.2 | 1.877719073 | 0.000268404 | Over expressed |
| XM_004011604.4 | 1.8762995   | 0.000272931 | Over expressed |
| XM_012150244.3 | 1.87550798  | 0.040138578 | Over expressed |
| XM_015096865.2 | 1.875089394 | 0.017875212 | Over expressed |
| XM_027966108.1 | 1.874070552 | 0.001981158 | Over expressed |
| XM_027958153.1 | 1.873666654 | 0.118562687 | Over expressed |
| XM_004010807.4 | 1.873220108 | 0.124196021 | Over expressed |
| XM_027978821.1 | 1.873086769 | 3.87E-10    | Over expressed |
| XM_004018994.4 | 1.872271075 | 0.005677224 | Over expressed |
| XM_004013783.3 | 1.871735569 | 0.009134949 | Over expressed |
| XM_027974776.1 | 1.871650893 | 0.126641018 | Over expressed |
| XR_003591235.1 | 1.871456614 | 0.114227342 | Over expressed |
| XM_004017484.3 | 1.870001168 | 0.005420103 | Over expressed |
| XM_027958322.1 | 1.868185888 | 0.085729313 | Over expressed |
| XM_004011587.4 | 1.867603759 | 0.036012555 | Over expressed |
| XM_004007001.4 | 1.864478318 | 0.007348466 | Over expressed |
| XM_004020888.4 | 1.864326068 | 0.056711472 | Over expressed |
| NM_001038013.1 | 1.862548334 | 0.00432305  | Over expressed |
| XM_027971986.1 | 1.862327099 | 0.08601828  | Over expressed |
| XM_027966225.1 | 1.861112216 | 0.00035315  | Over expressed |
| XM_027973387.1 | 1.860722335 | 8.34E-05    | Over expressed |
| XM_027961179.1 | 1.860570913 | 0.077087707 | Over expressed |
| XM_027956884.1 | 1.859013686 | 0.040317966 | Over expressed |
| XM_004006053.4 | 1.857507373 | 0.09134946  | Over expressed |
| XM_027975731.1 | 1.856106281 | 0.105556895 | Over expressed |
| XM_027958830.1 | 1.856040132 | 0.000708045 | Over expressed |
| XM_004008585.4 | 1.855273952 | 0.056242652 | Over expressed |
| XM_012106143.3 | 1.854533666 | 0.047872437 | Over expressed |
| XM_004005869.3 | 1.85420657  | 0.000194252 | Over expressed |
| XM_004003428.4 | 1.85204277  | 0.012825176 | Over expressed |
| XM_027970132.1 | 1.850244478 | 0.093062156 | Over expressed |
| XM_027978769.1 | 1.849917808 | 0.009043296 | Over expressed |

|                |             |             |                |
|----------------|-------------|-------------|----------------|
| XM_027973388.1 | 1.849889036 | 0.00303335  | Over expressed |
| XM_027968352.1 | 1.848690209 | 0.017875212 | Over expressed |
| XM_004005577.3 | 1.848383692 | 0.120498265 | Over expressed |
| XM_004011603.3 | 1.848366803 | 0.000648606 | Over expressed |
| XM_027970131.1 | 1.847195108 | 1.03E-09    | Over expressed |
| XM_004012682.4 | 1.847184771 | 0.040192347 | Over expressed |
| XM_015098783.2 | 1.846987242 | 0.044439613 | Over expressed |
| XM_027966081.1 | 1.846422375 | 0.068970619 | Over expressed |
| XM_004010301.4 | 1.843292165 | 5.95E-26    | Over expressed |
| XM_004002403.4 | 1.842031236 | 0.040905381 | Over expressed |
| XM_027967941.1 | 1.840958119 | 0.095995136 | Over expressed |
| XM_027970185.1 | 1.838257629 | 0.000175445 | Over expressed |
| XM_015094093.2 | 1.836947463 | 0.011051851 | Over expressed |
| XM_027974094.1 | 1.83582046  | 0.001525587 | Over expressed |
| XM_027960478.1 | 1.835270408 | 0.017344171 | Over expressed |
| XM_027961905.1 | 1.834969217 | 1.14E-05    | Over expressed |
| XM_027958712.1 | 1.834518976 | 0.008701424 | Over expressed |
| XM_012099136.3 | 1.831578853 | 0.012526807 | Over expressed |
| XM_004020994.4 | 1.830972008 | 0.006553512 | Over expressed |
| XM_027976987.1 | 1.830837977 | 0.008248762 | Over expressed |
| XM_012100180.3 | 1.830778811 | 0.117347728 | Over expressed |
| XM_004006724.4 | 1.829707159 | 0.124841266 | Over expressed |
| XM_004008401.3 | 1.828309708 | 0.023162673 | Over expressed |
| XM_027973401.1 | 1.826766633 | 0.010826965 | Over expressed |
| XM_027978298.1 | 1.826701533 | 0.003404664 | Over expressed |
| XM_027974841.1 | 1.825631276 | 0.01987145  | Over expressed |
| XM_004021022.4 | 1.825537558 | 0.000468678 | Over expressed |
| XM_027961264.1 | 1.825221122 | 0.008121416 | Over expressed |
| XM_027968199.1 | 1.825030354 | 0.00109297  | Over expressed |
| XR_003591878.1 | 1.82385134  | 0.033991724 | Over expressed |
| XM_027978928.1 | 1.821743049 | 0.043806866 | Over expressed |
| XM_027969219.1 | 1.821468715 | 0.011747675 | Over expressed |
| XM_012190166.3 | 1.821394244 | 0.067518204 | Over expressed |
| XM_004019653.4 | 1.81998788  | 0.043424052 | Over expressed |
| XM_012106759.3 | 1.81824016  | 0.000212418 | Over expressed |
| XM_004006965.4 | 1.816995815 | 0.040317383 | Over expressed |
| XR_003586211.1 | 1.815130195 | 0.066419921 | Over expressed |
| XM_027972122.1 | 1.815051403 | 0.007413789 | Over expressed |
| XR_003590709.1 | 1.814959812 | 0.013090879 | Over expressed |
| XM_027975010.1 | 1.814767658 | 0.025728453 | Over expressed |
| XM_004003093.4 | 1.814250015 | 0.041508388 | Over expressed |
| XM_004002602.4 | 1.8137327   | 0.031196313 | Over expressed |
| XM_027978857.1 | 1.813727212 | 3.40E-07    | Over expressed |
| XM_027976885.1 | 1.813128649 | 0.024887046 | Over expressed |

|                |             |             |                |
|----------------|-------------|-------------|----------------|
| XM_004004943.4 | 1.81272476  | 0.023077164 | Over expressed |
| XR_001020974.2 | 1.810393432 | 0.09519335  | Over expressed |
| XM_027963526.1 | 1.81003653  | 0.125073826 | Over expressed |
| NM_001009449.1 | 1.809194239 | 0.08771212  | Over expressed |
| XM_027959786.1 | 1.809051132 | 0.051021572 | Over expressed |
| XM_004017758.4 | 1.808395888 | 0.019442625 | Over expressed |
| XM_027965993.1 | 1.80680741  | 4.22E-07    | Over expressed |
| XM_027971361.1 | 1.805740193 | 0.055980039 | Over expressed |
| XM_027961165.1 | 1.805161841 | 2.47E-08    | Over expressed |
| XM_004007021.4 | 1.804123314 | 0.011082114 | Over expressed |
| XM_004018535.4 | 1.803576328 | 0.084608164 | Over expressed |
| XM_004008437.4 | 1.802174412 | 0.139019656 | Over expressed |
| XM_027978395.1 | 1.800568704 | 0.091631433 | Over expressed |
| XM_004014955.3 | 1.798155331 | 0.114734629 | Over expressed |
| XM_004005579.3 | 1.795528412 | 0.006990559 | Over expressed |
| XM_027957885.1 | 1.795044801 | 0.077415236 | Over expressed |
| XM_015093944.2 | 1.794694945 | 0.023939488 | Over expressed |
| XM_027974247.1 | 1.79148782  | 0.000419328 | Over expressed |
| XM_027977444.1 | 1.791022862 | 0.009043296 | Over expressed |
| XM_004015329.4 | 1.789810799 | 0.000604191 | Over expressed |
| XM_027969443.1 | 1.789110293 | 0.001699137 | Over expressed |
| XM_027959017.1 | 1.788365214 | 0.08353401  | Over expressed |
| XM_004008548.4 | 1.786438554 | 0.133159195 | Over expressed |
| XM_027977512.1 | 1.785629023 | 0.081729291 | Over expressed |
| XM_004010566.4 | 1.785286527 | 0.090169349 | Over expressed |
| XM_027974276.1 | 1.784142266 | 1.79E-05    | Over expressed |
| XM_027974275.1 | 1.781737016 | 0.022773918 | Over expressed |
| XM_027979478.1 | 1.779084276 | 0.003724018 | Over expressed |
| XM_027975986.1 | 1.776710081 | 0.100241732 | Over expressed |
| XM_012100994.3 | 1.775380739 | 0.002224336 | Over expressed |
| XM_027978476.1 | 1.774982211 | 0.000652953 | Over expressed |
| XM_027978453.1 | 1.774886284 | 0.05051446  | Over expressed |
| XM_027974105.1 | 1.774848436 | 0.142567156 | Over expressed |
| XM_027967526.1 | 1.773892611 | 0.067998257 | Over expressed |
| XM_027979806.1 | 1.773511686 | 0.019881571 | Over expressed |
| XM_004020145.3 | 1.773126055 | 0.02231269  | Over expressed |
| XM_015101934.2 | 1.772912204 | 0.020798222 | Over expressed |
| XM_027966737.1 | 1.770311196 | 0.002149353 | Over expressed |
| XM_027978758.1 | 1.76996411  | 4.42E-08    | Over expressed |
| XM_027974500.1 | 1.769810377 | 6.18E-06    | Over expressed |
| XR_003589446.1 | 1.769759697 | 0.037180511 | Over expressed |
| XM_027978594.1 | 1.769352949 | 0.000477849 | Over expressed |
| XM_027966397.1 | 1.769169903 | 0.103520258 | Over expressed |
| XM_012160346.3 | 1.769138897 | 0.044202863 | Over expressed |

|                |             |             |                |
|----------------|-------------|-------------|----------------|
| XM_027960175.1 | 1.768294296 | 0.034864585 | Over expressed |
| XM_012100278.3 | 1.76812468  | 0.006809358 | Over expressed |
| XM_004017663.4 | 1.763693444 | 0.011352163 | Over expressed |
| XM_004005872.4 | 1.763522063 | 0.006018776 | Over expressed |
| XM_027959990.1 | 1.763214608 | 6.13E-08    | Over expressed |
| XR_003591670.1 | 1.761364992 | 0.115627782 | Over expressed |
| XM_012190698.2 | 1.7603224   | 0.059518391 | Over expressed |
| NM_001142517.1 | 1.759422114 | 3.02E-11    | Over expressed |
| XM_015093072.2 | 1.758704375 | 0.008681624 | Over expressed |
| XM_004009292.3 | 1.756956437 | 0.089666148 | Over expressed |
| XR_003588567.1 | 1.75683974  | 0.008791375 | Over expressed |
| XM_027961413.1 | 1.755325054 | 0.007106993 | Over expressed |
| XM_027978650.1 | 1.752323924 | 0.017073828 | Over expressed |
| XM_012174157.2 | 1.751238493 | 0.117022896 | Over expressed |
| XM_012177564.2 | 1.749863639 | 0.03317565  | Over expressed |
| XM_004015187.4 | 1.748110991 | 0.068050639 | Over expressed |
| XM_027966012.1 | 1.747669993 | 0.144023509 | Over expressed |
| XM_004008784.3 | 1.746831052 | 0.075896173 | Over expressed |
| XM_027961903.1 | 1.742545229 | 0.04415186  | Over expressed |
| XM_027959020.1 | 1.742046478 | 0.080938909 | Over expressed |
| XM_027973986.1 | 1.740893668 | 0.079710872 | Over expressed |
| XM_027971848.1 | 1.740438705 | 0.108934881 | Over expressed |
| XM_015092769.2 | 1.739890295 | 0.004577608 | Over expressed |
| XM_004019677.4 | 1.739678192 | 0.002270708 | Over expressed |
| XM_027967381.1 | 1.737945549 | 0.053579367 | Over expressed |
| XM_012104077.3 | 1.737320331 | 0.030743544 | Over expressed |
| XM_027970026.1 | 1.736561008 | 2.80E-10    | Over expressed |
| XM_027977514.1 | 1.734267449 | 0.021508369 | Over expressed |
| XM_027959376.1 | 1.733428214 | 0.10548702  | Over expressed |
| XM_004002522.3 | 1.732658724 | 0.089161969 | Over expressed |
| XM_027969434.1 | 1.730727822 | 0.012444279 | Over expressed |
| NM_001205150.1 | 1.730177419 | 0.037188369 | Over expressed |
| XM_027959367.1 | 1.730125613 | 0.011448767 | Over expressed |
| XM_004019650.4 | 1.727024041 | 0.034128172 | Over expressed |
| XM_027958665.1 | 1.726904875 | 0.000178742 | Over expressed |
| XM_027961791.1 | 1.726500748 | 0.035935522 | Over expressed |
| XM_027957006.1 | 1.726120065 | 0.051900231 | Over expressed |
| XM_004018416.4 | 1.726047435 | 0.089666148 | Over expressed |
| XM_027973919.1 | 1.72473719  | 0.026507839 | Over expressed |
| XM_012185668.3 | 1.724689984 | 0.065347716 | Over expressed |
| XM_027961789.1 | 1.723625604 | 0.008025361 | Over expressed |
| XM_004018740.4 | 1.71910779  | 0.090169349 | Over expressed |
| XM_004002608.4 | 1.71900361  | 0.105599617 | Over expressed |
| XM_027978389.1 | 1.718415833 | 0.033228707 | Over expressed |



|                |             |             |                |
|----------------|-------------|-------------|----------------|
| XM_012174651.2 | 1.717826543 | 0.016903023 | Over expressed |
| XM_027969310.1 | 1.717590046 | 0.008426193 | Over expressed |
| XM_012162156.3 | 1.716373681 | 0.046931213 | Over expressed |
| XM_027966855.1 | 1.715168779 | 0.049923796 | Over expressed |
| NM_001245974.1 | 1.715163003 | 0.065347716 | Over expressed |
| XM_027969649.1 | 1.71448729  | 0.005199432 | Over expressed |
| XM_015104226.2 | 1.714203791 | 0.01972331  | Over expressed |
| XM_027959973.1 | 1.712552948 | 0.006025018 | Over expressed |
| XM_027978121.1 | 1.712194868 | 0.016610802 | Over expressed |
| XM_004015437.4 | 1.712188015 | 0.050209353 | Over expressed |
| XR_001034198.3 | 1.711439502 | 0.017559004 | Over expressed |
| XM_027971423.1 | 1.710705337 | 0.017073828 | Over expressed |
| XM_027960758.1 | 1.709862805 | 0.094805354 | Over expressed |
| XM_027958036.1 | 1.709469911 | 0.076557047 | Over expressed |
| XM_012104520.3 | 1.708138501 | 0.14617597  | Over expressed |
| NM_001139452.1 | 1.707966296 | 0.057852004 | Over expressed |
| XM_012095885.3 | 1.705393379 | 0.000404514 | Over expressed |
| XM_012187710.2 | 1.702778471 | 0.079997542 | Over expressed |
| XM_004023490.4 | 1.702552649 | 0.063321285 | Over expressed |
| XM_027971704.1 | 1.700771835 | 0.084035725 | Over expressed |
| XM_027959847.1 | 1.700622373 | 0.006245894 | Over expressed |
| XM_027957340.1 | 1.699382423 | 0.033449144 | Over expressed |
| XM_027962961.1 | 1.699170844 | 3.94E-18    | Over expressed |
| XM_004002580.4 | 1.698575475 | 0.015017327 | Over expressed |
| XM_004008546.4 | 1.69756559  | 0.003621121 | Over expressed |
| XM_027973438.1 | 1.695083911 | 0.021421875 | Over expressed |
| XR_001034868.3 | 1.692036385 | 0.00215865  | Over expressed |
| XM_004013080.4 | 1.691575219 | 0.071725236 | Over expressed |
| XM_004020717.4 | 1.69058606  | 0.000953447 | Over expressed |
| XM_012104387.2 | 1.690207723 | 0.007461413 | Over expressed |
| XM_027966834.1 | 1.690203978 | 0.105556895 | Over expressed |
| XM_012107522.2 | 1.68824198  | 0.015861546 | Over expressed |
| XM_027960820.1 | 1.686502179 | 0.004348569 | Over expressed |
| XM_027972279.1 | 1.682871492 | 0.021124401 | Over expressed |
| XM_027971553.1 | 1.68103618  | 0.03509318  | Over expressed |
| XM_004018850.4 | 1.680791813 | 0.027857065 | Over expressed |
| XM_004006979.4 | 1.680090522 | 0.023535402 | Over expressed |
| XM_027974439.1 | 1.678815549 | 0.001055054 | Over expressed |
| XM_027977221.1 | 1.677485667 | 0.093765712 | Over expressed |
| XM_027968254.1 | 1.676839025 | 0.030888534 | Over expressed |
| XM_027973793.1 | 1.675620781 | 0.067344828 | Over expressed |
| XM_015104222.2 | 1.674720086 | 0.018513262 | Over expressed |
| XM_027969320.1 | 1.674425346 | 0.072458819 | Over expressed |
| XM_027969446.1 | 1.673563674 | 0.001040944 | Over expressed |

|                |             |             |                |
|----------------|-------------|-------------|----------------|
| XM_015098668.2 | 1.671516555 | 0.005349469 | Over expressed |
| XM_027963523.1 | 1.670544986 | 0.042779189 | Over expressed |
| XM_027956242.1 | 1.66981021  | 0.029102016 | Over expressed |
| XM_012189344.3 | 1.668828711 | 0.021301653 | Over expressed |
| XM_012099958.3 | 1.668064668 | 0.116127278 | Over expressed |
| XM_027974048.1 | 1.667676342 | 3.66E-06    | Over expressed |
| XM_027956939.1 | 1.667102527 | 0.030743544 | Over expressed |
| XM_027975636.1 | 1.666457764 | 0.054004676 | Over expressed |
| XM_004012669.3 | 1.665799102 | 0.026507839 | Over expressed |
| XM_004008049.4 | 1.664871556 | 0.012505497 | Over expressed |
| XM_012177581.2 | 1.664116399 | 0.10929768  | Over expressed |
| XM_027966284.1 | 1.66020868  | 0.115757473 | Over expressed |
| XM_027978396.1 | 1.659763861 | 0.127543618 | Over expressed |
| XM_027971297.1 | 1.659348696 | 9.24E-08    | Over expressed |
| XM_012183404.2 | 1.659136495 | 0.004834655 | Over expressed |
| XM_027960479.1 | 1.659128758 | 0.008331256 | Over expressed |
| XM_027966150.1 | 1.658757265 | 4.74E-05    | Over expressed |
| XM_004017395.4 | 1.655640958 | 0.141812568 | Over expressed |
| XR_003591756.1 | 1.654308646 | 0.049948168 | Over expressed |
| XM_004006729.4 | 1.65394876  | 0.031196313 | Over expressed |
| XM_004008576.4 | 1.653083915 | 6.25E-05    | Over expressed |
| XM_027971211.1 | 1.652338557 | 0.094592043 | Over expressed |
| XM_004020978.4 | 1.649930247 | 0.021565867 | Over expressed |
| XM_027975631.1 | 1.649168206 | 0.018769702 | Over expressed |
| XM_004020904.4 | 1.648644821 | 0.040192347 | Over expressed |
| XM_012183007.2 | 1.648262378 | 0.00652663  | Over expressed |
| XM_012174322.3 | 1.647887729 | 0.029800936 | Over expressed |
| XM_004021571.3 | 1.647547135 | 0.032574721 | Over expressed |
| XM_027968256.1 | 1.64695957  | 0.127677096 | Over expressed |
| XM_027971016.1 | 1.644550285 | 0.017406573 | Over expressed |
| XM_015094163.2 | 1.64434121  | 0.009954469 | Over expressed |
| XM_015104240.2 | 1.644152613 | 0.000652631 | Over expressed |
| XM_027968893.1 | 1.643721333 | 0.023996518 | Over expressed |
| XM_012130401.3 | 1.643559109 | 0.037920102 | Over expressed |
| XM_004007055.4 | 1.643054889 | 0.0016319   | Over expressed |
| XM_015093696.2 | 1.642551658 | 0.014994054 | Over expressed |
| XM_027963037.1 | 1.641727488 | 0.005492587 | Over expressed |
| XM_004012580.4 | 1.639331208 | 0.084518502 | Over expressed |
| XM_015100713.2 | 1.638111739 | 7.69E-05    | Over expressed |
| XM_027968244.1 | 1.637638857 | 0.008155947 | Over expressed |
| XR_003591376.1 | 1.63647184  | 0.009134949 | Over expressed |
| XM_027969724.1 | 1.635905273 | 0.060794449 | Over expressed |
| XR_003587283.1 | 1.635614588 | 0.04978737  | Over expressed |
| XR_003588569.1 | 1.634300717 | 0.000990045 | Over expressed |

|                |             |             |                |
|----------------|-------------|-------------|----------------|
| XM_012174649.2 | 1.633227882 | 0.13094989  | Over expressed |
| XM_027971171.1 | 1.632049792 | 0.000110161 | Over expressed |
| XM_004015111.4 | 1.631975422 | 0.142200853 | Over expressed |
| XM_027979347.1 | 1.631056778 | 0.078081541 | Over expressed |
| XM_027974139.1 | 1.629757934 | 0.031508716 | Over expressed |
| XM_004002695.4 | 1.629544357 | 1.86E-07    | Over expressed |
| XM_012183443.3 | 1.62899948  | 0.002634761 | Over expressed |
| XM_027970028.1 | 1.627364442 | 0.001537661 | Over expressed |
| XM_004004894.4 | 1.626506764 | 0.118757638 | Over expressed |
| XM_027978526.1 | 1.625333111 | 0.054657193 | Over expressed |
| XM_004015419.4 | 1.624596164 | 0.001980175 | Over expressed |
| XM_004004265.4 | 1.623088643 | 0.068576147 | Over expressed |
| XM_015100617.2 | 1.622528964 | 0.023409628 | Over expressed |
| XM_027979805.1 | 1.622345924 | 0.007275229 | Over expressed |
| XM_004022140.3 | 1.620270709 | 0.064733848 | Over expressed |
| XM_027958117.1 | 1.618682897 | 0.08471501  | Over expressed |
| XM_027969836.1 | 1.616724573 | 3.53E-06    | Over expressed |
| XM_015096093.2 | 1.615332982 | 0.033309104 | Over expressed |
| XM_027970239.1 | 1.613900437 | 0.000391364 | Over expressed |
| XM_027977945.1 | 1.61279382  | 0.013657581 | Over expressed |
| XM_012100093.2 | 1.611771824 | 4.43E-05    | Over expressed |
| XM_012173775.2 | 1.611503858 | 0.08012409  | Over expressed |
| XM_004023349.4 | 1.608660861 | 0.026896125 | Over expressed |
| XM_015094243.2 | 1.608333564 | 0.037413702 | Over expressed |
| XM_012175860.3 | 1.607964624 | 0.010557192 | Over expressed |
| XM_027974097.1 | 1.606857217 | 0.086085084 | Over expressed |
| XM_027977006.1 | 1.606468058 | 0.049027713 | Over expressed |
| XM_027961469.1 | 1.605400878 | 0.064251997 | Over expressed |
| XM_027967524.1 | 1.60347348  | 0.03760585  | Over expressed |
| XM_027966433.1 | 1.602995129 | 0.111091235 | Over expressed |
| XM_015098606.2 | 1.601046946 | 0.032193485 | Over expressed |
| XM_027957539.1 | 1.600362674 | 0.049002159 | Over expressed |
| XM_004002344.4 | 1.600236247 | 0.073745649 | Over expressed |
| XM_004004921.3 | 1.599644556 | 9.23E-05    | Over expressed |
| XM_004008556.3 | 1.598059662 | 0.134256419 | Over expressed |
| XM_027970192.1 | 1.597983593 | 0.140400335 | Over expressed |
| XM_027961638.1 | 1.596962707 | 0.027991076 | Over expressed |
| XM_027967615.1 | 1.596829262 | 0.036723101 | Over expressed |
| XM_027971267.1 | 1.5966963   | 0.098121422 | Over expressed |
| XM_027956936.1 | 1.596099662 | 7.80E-06    | Over expressed |
| XM_027961934.1 | 1.595416103 | 0.04269936  | Over expressed |
| XM_004005559.4 | 1.595293071 | 0.000652866 | Over expressed |
| XR_003588841.1 | 1.592940815 | 0.017569601 | Over expressed |
| XM_015095865.2 | 1.590974175 | 0.024405786 | Over expressed |

|                |             |             |                |
|----------------|-------------|-------------|----------------|
| XM_027975385.1 | 1.59067198  | 0.018297923 | Over expressed |
| XM_004012769.3 | 1.590514025 | 0.044764845 | Over expressed |
| XM_027967940.1 | 1.58918727  | 0.057400697 | Over expressed |
| XM_004015386.4 | 1.588466102 | 0.104694174 | Over expressed |
| XM_027966154.1 | 1.588403276 | 0.06819525  | Over expressed |
| XM_004008575.4 | 1.587877331 | 0.024310909 | Over expressed |
| XM_004018837.4 | 1.587054521 | 0.012910881 | Over expressed |
| XM_004017738.3 | 1.586911302 | 0.013372331 | Over expressed |
| XM_027963278.1 | 1.585590557 | 0.075116027 | Over expressed |
| XM_015097580.2 | 1.584863338 | 0.011386162 | Over expressed |
| XM_004020714.4 | 1.584789989 | 0.108390843 | Over expressed |
| XM_027977141.1 | 1.582532688 | 0.010501455 | Over expressed |
| XM_027979778.1 | 1.582267556 | 0.021482536 | Over expressed |
| NM_001105263.1 | 1.581630728 | 0.112194594 | Over expressed |
| XM_004022654.4 | 1.580817006 | 5.53E-08    | Over expressed |
| XM_027976051.1 | 1.580641209 | 0.058804733 | Over expressed |
| XM_004006836.4 | 1.580601341 | 0.046233285 | Over expressed |
| XM_027974280.1 | 1.578188564 | 0.113782772 | Over expressed |
| XM_027970127.1 | 1.575634535 | 3.11E-05    | Over expressed |
| XR_003591239.1 | 1.575167625 | 0.094813745 | Over expressed |
| XM_004019714.4 | 1.573708597 | 0.00348434  | Over expressed |
| XM_027958779.1 | 1.573572436 | 0.000989973 | Over expressed |
| XM_015098595.2 | 1.573045452 | 0.003884336 | Over expressed |
| XM_004014164.4 | 1.572544352 | 0.005013366 | Over expressed |
| XM_027962102.1 | 1.5703743   | 0.122519414 | Over expressed |
| XM_004007014.4 | 1.569228857 | 0.010154235 | Over expressed |
| XM_004014883.4 | 1.56892214  | 0.065004996 | Over expressed |
| XM_027961895.1 | 1.567809587 | 0.023077164 | Over expressed |
| XM_027972960.1 | 1.567641063 | 0.125007433 | Over expressed |
| XM_027959130.1 | 1.567526848 | 0.025548037 | Over expressed |
| XM_027957639.1 | 1.566815467 | 0.018152862 | Over expressed |
| XM_004018227.4 | 1.566325907 | 0.000643223 | Over expressed |
| XM_004006935.4 | 1.564699329 | 0.04452835  | Over expressed |
| XM_027975856.1 | 1.563223364 | 0.126219877 | Over expressed |
| XM_027957448.1 | 1.562634319 | 0.128230622 | Over expressed |
| XM_027978069.1 | 1.561878812 | 0.091811836 | Over expressed |
| XM_027970576.1 | 1.560757648 | 0.001559245 | Over expressed |
| XM_027978419.1 | 1.558524194 | 0.076341965 | Over expressed |
| XM_015102653.2 | 1.558128068 | 0.037190462 | Over expressed |
| XM_027957862.1 | 1.557059434 | 0.007230763 | Over expressed |
| XM_015098950.2 | 1.554971618 | 0.133956634 | Over expressed |
| XM_027962103.1 | 1.553239967 | 0.1063414   | Over expressed |
| XM_027978765.1 | 1.551802789 | 0.074307569 | Over expressed |
| XM_027970129.1 | 1.54958956  | 0.137884717 | Over expressed |

|                |             |             |                |
|----------------|-------------|-------------|----------------|
| XM_027959466.1 | 1.549530904 | 0.000364108 | Over expressed |
| XM_027968127.1 | 1.548473179 | 0.025050032 | Over expressed |
| XM_027962018.1 | 1.547820345 | 0.055677671 | Over expressed |
| XM_027966891.1 | 1.546154269 | 0.011394995 | Over expressed |
| XM_004013784.4 | 1.543090688 | 4.94E-05    | Over expressed |
| XM_027958387.1 | 1.542643787 | 0.086774575 | Over expressed |
| XM_027967017.1 | 1.542172091 | 0.068050639 | Over expressed |
| XM_027957192.1 | 1.539971389 | 0.11980626  | Over expressed |
| XM_027978859.1 | 1.538355488 | 0.01204115  | Over expressed |
| XM_027961148.1 | 1.537523606 | 0.005429258 | Over expressed |
| XM_004004374.4 | 1.535753628 | 0.071849297 | Over expressed |
| NM_001134303.1 | 1.535381661 | 0.057877864 | Over expressed |
| XM_015098887.2 | 1.53350247  | 0.063876801 | Over expressed |
| XM_004008478.3 | 1.532067599 | 0.03303547  | Over expressed |
| XM_027978531.1 | 1.531223985 | 5.89E-06    | Over expressed |
| XM_027956642.1 | 1.528839492 | 0.109608148 | Over expressed |
| XM_027963034.1 | 1.527268483 | 0.048195485 | Over expressed |
| XM_027961198.1 | 1.52613878  | 0.114942497 | Over expressed |
| XM_012100685.2 | 1.524749896 | 0.000725919 | Over expressed |
| XM_027976832.1 | 1.524079059 | 0.020793974 | Over expressed |
| XR_003590450.1 | 1.523585628 | 0.125437259 | Over expressed |
| XM_027958685.1 | 1.522962464 | 0.113291459 | Over expressed |
| XM_027970532.1 | 1.522887186 | 0.048743718 | Over expressed |
| XM_004012825.4 | 1.522370522 | 0.033995756 | Over expressed |
| XM_027972446.1 | 1.522188005 | 0.002562297 | Over expressed |
| XM_027960852.1 | 1.521652653 | 0.038314995 | Over expressed |
| XM_027961926.1 | 1.521588194 | 0.009155017 | Over expressed |
| XM_027977627.1 | 1.521423693 | 0.107697796 | Over expressed |
| XM_004008988.4 | 1.521069551 | 0.054921606 | Over expressed |
| XM_004020696.3 | 1.519558372 | 4.58E-05    | Over expressed |
| XM_027964963.1 | 1.51915114  | 0.102272972 | Over expressed |
| XM_027959395.1 | 1.518997315 | 0.038243343 | Over expressed |
| XM_027958015.1 | 1.518810741 | 0.081837807 | Over expressed |
| XM_027961490.1 | 1.518529221 | 6.83E-07    | Over expressed |
| XM_004017783.4 | 1.517383671 | 0.083679115 | Over expressed |
| XM_027969020.1 | 1.517272237 | 0.023325618 | Over expressed |
| XM_027971345.1 | 1.516600629 | 0.042176471 | Over expressed |
| XM_015101978.2 | 1.515387328 | 0.13014285  | Over expressed |
| XM_004021069.4 | 1.512137115 | 0.008252168 | Over expressed |
| XR_003589942.1 | 1.511960131 | 0.12460053  | Over expressed |
| XM_012099274.2 | 1.511185737 | 6.14E-19    | Over expressed |
| XM_004019603.4 | 1.510673972 | 4.03E-05    | Over expressed |
| XM_004015318.4 | 1.510248174 | 0.110224638 | Over expressed |
| XM_027957723.1 | 1.508423329 | 0.044142627 | Over expressed |

|                |             |             |                |
|----------------|-------------|-------------|----------------|
| XM_027967358.1 | 1.508294653 | 0.13014285  | Over expressed |
| XM_027962056.1 | 1.508076541 | 0.07956239  | Over expressed |
| XM_012099936.3 | 1.507502653 | 0.132221696 | Over expressed |
| XM_012100964.2 | 1.505504814 | 0.069012514 | Over expressed |
| XM_027961356.1 | 1.505208443 | 0.010012584 | Over expressed |
| XM_027966182.1 | 1.505144771 | 0.013856063 | Over expressed |
| XM_027961751.1 | 1.504712876 | 0.024617121 | Over expressed |
| XM_012101646.3 | 1.504585354 | 0.023137406 | Over expressed |
| XM_027961610.1 | 1.504521537 | 0.002921991 | Over expressed |
| XR_003591587.1 | 1.504174913 | 0.090703348 | Over expressed |
| XM_004020897.4 | 1.503846271 | 0.006368803 | Over expressed |
| XM_027966738.1 | 1.502741378 | 0.040905381 | Over expressed |
| XM_012120828.3 | 1.502575634 | 0.001851213 | Over expressed |
| XM_027970313.1 | 1.501741584 | 0.039275584 | Over expressed |
| XM_004007057.4 | 1.500470328 | 0.00752197  | Over expressed |
| XM_027967403.1 | 1.499996126 | 0.037172299 | Over expressed |
| XR_003587633.1 | 1.498545069 | 0.000248305 | Over expressed |
| XR_003591300.1 | 1.498505059 | 0.038453148 | Over expressed |
| XM_027978544.1 | 1.4984481   | 0.020480763 | Over expressed |
| XM_027968699.1 | 1.496042456 | 0.009270789 | Over expressed |
| XM_027969448.1 | 1.495812908 | 0.027450496 | Over expressed |
| XM_004019694.4 | 1.495021867 | 0.021828034 | Over expressed |
| XM_004021023.4 | 1.493620663 | 0.012639273 | Over expressed |
| XM_027961582.1 | 1.493531812 | 0.028883374 | Over expressed |
| XM_004018927.4 | 1.493171814 | 0.009684676 | Over expressed |
| XM_004007054.4 | 1.492866177 | 0.135976784 | Over expressed |
| XM_004012926.3 | 1.492583577 | 1.69E-09    | Over expressed |
| XM_027963691.1 | 1.491138892 | 0.002062358 | Over expressed |
| XM_027965673.1 | 1.491109195 | 0.03082761  | Over expressed |
| XM_015091922.2 | 1.490912589 | 0.037683243 | Over expressed |
| XM_004015648.4 | 1.490362175 | 0.000362879 | Over expressed |
| XM_027968065.1 | 1.489463475 | 0.012505497 | Over expressed |
| XM_027970150.1 | 1.488125393 | 0.047973402 | Over expressed |
| XM_004012666.4 | 1.487847406 | 0.017317709 | Over expressed |
| XM_004013075.3 | 1.486920949 | 0.002053308 | Over expressed |
| XM_004006603.4 | 1.483513442 | 0.0897164   | Over expressed |
| XM_004015366.3 | 1.482408626 | 0.001049855 | Over expressed |
| XM_004010530.4 | 1.481944951 | 0.069598092 | Over expressed |
| XM_004012985.4 | 1.481772036 | 0.004577608 | Over expressed |
| XM_027957876.1 | 1.480962307 | 0.002642975 | Over expressed |
| XM_027966067.1 | 1.479134563 | 0.036353636 | Over expressed |
| XM_027961460.1 | 1.478979993 | 0.000734898 | Over expressed |
| XM_012100918.3 | 1.476663494 | 0.003282492 | Over expressed |
| XM_027965218.1 | 1.476402531 | 0.00366982  | Over expressed |

|                |             |             |                |
|----------------|-------------|-------------|----------------|
| XM_027973336.1 | 1.476368484 | 0.001452677 | Over expressed |
| XR_003591460.1 | 1.47365263  | 0.08218688  | Over expressed |
| XR_001436363.2 | 1.472930581 | 0.11401293  | Over expressed |
| XM_027963279.1 | 1.471521684 | 0.004079251 | Over expressed |
| XM_015099477.2 | 1.469798863 | 0.002524616 | Over expressed |
| XM_012182049.2 | 1.468710343 | 0.073745649 | Over expressed |
| XM_015099409.2 | 1.468565895 | 0.086422197 | Over expressed |
| XM_004006170.4 | 1.468217508 | 0.001159486 | Over expressed |
| XM_004020701.4 | 1.467899072 | 0.055676361 | Over expressed |
| XM_004012798.4 | 1.466946989 | 0.000927343 | Over expressed |
| XM_027978469.1 | 1.46494419  | 0.023405321 | Over expressed |
| XM_012105786.3 | 1.464606989 | 0.009134949 | Over expressed |
| XM_027978291.1 | 1.462217336 | 1.21E-06    | Over expressed |
| XR_003591061.1 | 1.460510484 | 0.000304676 | Over expressed |
| XM_004002480.4 | 1.459651827 | 0.120599782 | Over expressed |
| XM_027969415.1 | 1.458139905 | 0.000632757 | Over expressed |
| XM_027965709.1 | 1.456569954 | 0.043359338 | Over expressed |
| XM_027978777.1 | 1.4547977   | 0.009910192 | Over expressed |
| XM_004015372.3 | 1.448817118 | 0.115757473 | Over expressed |
| XM_027957668.1 | 1.448753743 | 0.031713873 | Over expressed |
| XM_027977435.1 | 1.447387221 | 0.101661628 | Over expressed |
| XM_004012763.4 | 1.446874567 | 2.09E-05    | Over expressed |
| XM_027965207.1 | 1.44530304  | 0.055671546 | Over expressed |
| XM_015098669.2 | 1.445191865 | 0.02145162  | Over expressed |
| XM_004006155.3 | 1.444633235 | 0.084223096 | Over expressed |
| XM_004015605.4 | 1.444147243 | 1.19E-06    | Over expressed |
| XM_004016101.4 | 1.442977876 | 0.005908167 | Over expressed |
| XM_027977780.1 | 1.442506861 | 0.08686471  | Over expressed |
| XM_015095152.2 | 1.440253669 | 0.014706451 | Over expressed |
| XM_027961255.1 | 1.440055072 | 0.038453148 | Over expressed |
| XM_012174323.3 | 1.439858402 | 0.056767097 | Over expressed |
| XM_027966844.1 | 1.438930421 | 0.029099651 | Over expressed |
| XM_027978485.1 | 1.438826986 | 0.051900231 | Over expressed |
| XM_027961752.1 | 1.438076852 | 6.77E-05    | Over expressed |
| XM_004014607.4 | 1.43687785  | 0.120445737 | Over expressed |
| XM_027960093.1 | 1.436767586 | 0.036157469 | Over expressed |
| XM_027975040.1 | 1.436634356 | 0.132107442 | Over expressed |
| XM_027978426.1 | 1.436614435 | 0.000589551 | Over expressed |
| XM_027959594.1 | 1.436006252 | 0.026311405 | Over expressed |
| XM_012188066.3 | 1.435289599 | 0.011678027 | Over expressed |
| XM_027960724.1 | 1.43464443  | 0.010154235 | Over expressed |
| XM_012174780.3 | 1.434373982 | 0.010209275 | Over expressed |
| XM_012100843.3 | 1.433382165 | 0.08218688  | Over expressed |
| XM_004020088.4 | 1.431866074 | 0.075520292 | Over expressed |

|                |             |             |                |
|----------------|-------------|-------------|----------------|
| XR_003589751.1 | 1.430277265 | 0.056187657 | Over expressed |
| XM_027960178.1 | 1.429943317 | 0.033188918 | Over expressed |
| XM_027975909.1 | 1.429671148 | 0.081729291 | Over expressed |
| XM_027978310.1 | 1.426627448 | 0.127903557 | Over expressed |
| XM_015098945.2 | 1.426086745 | 0.040905381 | Over expressed |
| XM_027962912.1 | 1.424785648 | 0.082637513 | Over expressed |
| XM_027962781.1 | 1.423858903 | 1.91E-10    | Over expressed |
| XM_027961182.1 | 1.423853061 | 0.019272011 | Over expressed |
| XR_003587166.1 | 1.423515016 | 0.073591388 | Over expressed |
| XM_004014247.4 | 1.422977697 | 0.026896125 | Over expressed |
| XM_027964882.1 | 1.422568722 | 0.018614384 | Over expressed |
| XM_012098122.3 | 1.417705663 | 0.00372592  | Over expressed |
| XM_027960208.1 | 1.417004193 | 0.056950774 | Over expressed |
| XM_027969781.1 | 1.41696949  | 0.048420843 | Over expressed |
| XM_027974300.1 | 1.414720871 | 0.008183892 | Over expressed |
| XM_027974613.1 | 1.413039408 | 0.047825491 | Over expressed |
| XM_027978841.1 | 1.411920298 | 0.000551225 | Over expressed |
| XM_027978947.1 | 1.411406869 | 0.031672061 | Over expressed |
| XM_004015353.4 | 1.411035036 | 0.081599705 | Over expressed |
| XM_027971271.1 | 1.409479152 | 0.001195832 | Over expressed |
| XM_027958691.1 | 1.409337872 | 0.109397317 | Over expressed |
| XM_027961816.1 | 1.408296594 | 1.45E-05    | Over expressed |
| XM_027961830.1 | 1.40736146  | 0.032762505 | Over expressed |
| XM_004014508.4 | 1.407258089 | 0.052559636 | Over expressed |
| XM_012178062.2 | 1.407130058 | 0.01120223  | Over expressed |
| XM_004015466.4 | 1.406395213 | 0.044764845 | Over expressed |
| NM_001161734.1 | 1.405830054 | 0.033991724 | Over expressed |
| XM_027972124.1 | 1.405551827 | 0.013296041 | Over expressed |
| XM_015101666.2 | 1.403263581 | 0.068994586 | Over expressed |
| XM_004005911.4 | 1.402873109 | 0.021436219 | Over expressed |
| XM_027957323.1 | 1.402062844 | 0.098471359 | Over expressed |
| XM_027974252.1 | 1.398901817 | 0.006440947 | Over expressed |
| XM_027962067.1 | 1.398819827 | 4.61E-05    | Over expressed |
| XM_004004295.3 | 1.398627544 | 0.024259214 | Over expressed |
| XM_027960972.1 | 1.396565965 | 0.001033208 | Over expressed |
| XM_027977786.1 | 1.396311428 | 0.11898354  | Over expressed |
| XR_003590594.1 | 1.395309677 | 0.008213942 | Over expressed |
| XM_027966319.1 | 1.394390736 | 0.096682644 | Over expressed |
| XM_027964508.1 | 1.392297993 | 0.000184248 | Over expressed |
| XM_027968713.1 | 1.39195174  | 0.023792089 | Over expressed |
| XM_027970317.1 | 1.390749837 | 0.005035259 | Over expressed |
| XM_027969889.1 | 1.388855566 | 0.097314195 | Over expressed |
| XM_027959638.1 | 1.388333107 | 0.140216823 | Over expressed |
| XM_012169297.3 | 1.387719956 | 0.001527043 | Over expressed |



|                |             |             |                |
|----------------|-------------|-------------|----------------|
| XM_027959302.1 | 1.385368358 | 0.060289688 | Over expressed |
| XR_003586407.1 | 1.384039844 | 0.114276131 | Over expressed |
| XM_027977161.1 | 1.38371882  | 0.115757473 | Over expressed |
| XR_003590713.1 | 1.382762986 | 0.057987599 | Over expressed |
| XM_015100465.2 | 1.382729564 | 0.058259086 | Over expressed |
| XM_004013842.3 | 1.382613092 | 0.009658024 | Over expressed |
| XM_027971279.1 | 1.382230222 | 0.000979204 | Over expressed |
| XM_027976077.1 | 1.381718502 | 0.034028849 | Over expressed |
| XR_003585569.1 | 1.380976784 | 0.029824081 | Over expressed |
| XM_027965923.1 | 1.379651869 | 0.087691539 | Over expressed |
| XM_027966253.1 | 1.379208108 | 0.01133288  | Over expressed |
| XM_004004069.4 | 1.379087378 | 0.149437976 | Over expressed |
| XM_015096058.2 | 1.377802911 | 0.099181007 | Over expressed |
| XM_004020915.4 | 1.377574712 | 0.021289469 | Over expressed |
| XM_027957166.1 | 1.376794312 | 0.069739752 | Over expressed |
| XM_004007027.3 | 1.376556382 | 0.004243687 | Over expressed |
| XM_027979834.1 | 1.376448419 | 0.006965488 | Over expressed |
| XM_027956406.1 | 1.375052216 | 0.003330493 | Over expressed |
| XM_027973344.1 | 1.374732338 | 0.004724994 | Over expressed |
| XM_004012943.4 | 1.374038076 | 0.029824081 | Over expressed |
| XM_012158598.2 | 1.373282721 | 0.026507839 | Over expressed |
| XM_027959715.1 | 1.371661771 | 0.14014596  | Over expressed |
| XM_004020126.4 | 1.369767921 | 0.002840247 | Over expressed |
| XM_015099492.2 | 1.369281707 | 0.036462063 | Over expressed |
| NM_001126344.1 | 1.369233058 | 0.025050032 | Over expressed |
| XM_027966174.1 | 1.368418295 | 3.29E-06    | Over expressed |
| XM_015103188.2 | 1.367864633 | 0.029824081 | Over expressed |
| XM_027968290.1 | 1.36766912  | 0.019989356 | Over expressed |
| XM_027966739.1 | 1.366575546 | 0.00090434  | Over expressed |
| XM_004012790.4 | 1.366317292 | 0.094373585 | Over expressed |
| XM_004002593.4 | 1.366248571 | 0.007970897 | Over expressed |
| XM_004008974.2 | 1.366146631 | 0.071123693 | Over expressed |
| XM_027957872.1 | 1.365798233 | 0.063812555 | Over expressed |
| XM_027970834.1 | 1.365571553 | 0.04962176  | Over expressed |
| XM_027967982.1 | 1.364200799 | 0.0090353   | Over expressed |
| XM_004021798.4 | 1.361639158 | 0.001087475 | Over expressed |
| XM_004023614.4 | 1.360794697 | 0.040249175 | Over expressed |
| NM_001166181.1 | 1.360694139 | 0.05740509  | Over expressed |
| XM_004010321.4 | 1.357896367 | 0.010914748 | Over expressed |
| XM_015103636.2 | 1.357812577 | 0.07218715  | Over expressed |
| XM_027961287.1 | 1.357286069 | 0.114734629 | Over expressed |
| XM_027968250.1 | 1.356651887 | 0.109989214 | Over expressed |
| XM_027961234.1 | 1.356173328 | 0.038453148 | Over expressed |
| XM_027974052.1 | 1.355476821 | 0.007275229 | Over expressed |

|                |             |             |                |
|----------------|-------------|-------------|----------------|
| XM_015101781.2 | 1.35498993  | 0.034864585 | Over expressed |
| XM_015093687.2 | 1.354461634 | 0.136981256 | Over expressed |
| XM_027959526.1 | 1.354419115 | 0.038565798 | Over expressed |
| XM_004022513.4 | 1.35349905  | 0.008681624 | Over expressed |
| XM_027969837.1 | 1.353477456 | 0.029126185 | Over expressed |
| XM_012096635.3 | 1.353160621 | 0.107697796 | Over expressed |
| XM_027974994.1 | 1.352976933 | 0.084035725 | Over expressed |
| XM_027961162.1 | 1.351711531 | 0.010809775 | Over expressed |
| XR_001043959.3 | 1.351235737 | 0.122511419 | Over expressed |
| XM_004022084.4 | 1.350342253 | 0.00209685  | Over expressed |
| XM_027962804.1 | 1.349605838 | 0.023325618 | Over expressed |
| XM_027959257.1 | 1.349421113 | 0.122387102 | Over expressed |
| XM_012183038.3 | 1.349399277 | 0.041498006 | Over expressed |
| XM_027960505.1 | 1.348715429 | 0.001136631 | Over expressed |
| XM_027959583.1 | 1.348667206 | 0.039560416 | Over expressed |
| XM_027961297.1 | 1.348353963 | 0.005581919 | Over expressed |
| XM_027958037.1 | 1.344373766 | 0.027487238 | Over expressed |
| XM_027958440.1 | 1.344273763 | 0.011087854 | Over expressed |
| XM_004018464.4 | 1.344094158 | 0.048219576 | Over expressed |
| XR_001041966.3 | 1.342989459 | 0.140216823 | Over expressed |
| XM_027961052.1 | 1.342472737 | 0.008864064 | Over expressed |
| XM_015099215.2 | 1.339336462 | 0.022395235 | Over expressed |
| XM_027975141.1 | 1.338896871 | 1.26E-11    | Over expressed |
| XM_027965459.1 | 1.338315483 | 0.013372331 | Over expressed |
| XM_027962068.1 | 1.337830827 | 0.08471501  | Over expressed |
| XM_004015467.4 | 1.337095759 | 0.018769702 | Over expressed |
| XM_027972754.1 | 1.336357478 | 0.012264715 | Over expressed |
| XM_012104119.3 | 1.335915326 | 0.129988258 | Over expressed |
| XM_027958658.1 | 1.335459735 | 0.004630032 | Over expressed |
| XM_027977612.1 | 1.335443956 | 0.010724842 | Over expressed |
| XM_027977463.1 | 1.334049068 | 0.063675194 | Over expressed |
| XM_027969694.1 | 1.333391138 | 0.033453964 | Over expressed |
| XM_004014361.3 | 1.333252888 | 0.047872437 | Over expressed |
| NM_001131030.1 | 1.331780678 | 0.074207643 | Over expressed |
| XM_004015256.4 | 1.331691492 | 0.000453158 | Over expressed |
| XM_027974287.1 | 1.331115227 | 0.115720612 | Over expressed |
| XM_004004132.4 | 1.330106592 | 0.076791544 | Over expressed |
| NM_001009786.2 | 1.328656351 | 0.029412644 | Over expressed |
| XM_027972933.1 | 1.328493546 | 0.149437976 | Over expressed |
| XM_004022237.3 | 1.326270247 | 0.094592043 | Over expressed |
| XM_004014563.4 | 1.326034014 | 0.036012555 | Over expressed |
| XM_027960123.1 | 1.324605438 | 0.097778363 | Over expressed |
| XM_015104208.2 | 1.324259603 | 0.000128364 | Over expressed |
| XM_027961788.1 | 1.324090476 | 0.097335284 | Over expressed |

|                |             |             |                |
|----------------|-------------|-------------|----------------|
| XM_012173607.3 | 1.321009735 | 0.028161111 | Over expressed |
| XM_027961738.1 | 1.320388753 | 0.130110015 | Over expressed |
| XM_004018476.4 | 1.319615053 | 0.028011135 | Over expressed |
| XR_003588455.1 | 1.319302021 | 0.069913687 | Over expressed |
| XM_004001992.3 | 1.317761092 | 0.10561358  | Over expressed |
| XM_027977707.1 | 1.317082145 | 0.012526807 | Over expressed |
| XM_004014461.4 | 1.316096528 | 0.023894404 | Over expressed |
| XM_027960091.1 | 1.314905368 | 0.04821245  | Over expressed |
| XM_004016454.4 | 1.31440834  | 0.001276696 | Over expressed |
| XM_004020271.4 | 1.314362334 | 0.075594242 | Over expressed |
| XR_001435461.2 | 1.314350202 | 0.113278846 | Over expressed |
| XM_012130509.3 | 1.313660944 | 0.002342774 | Over expressed |
| XM_027977760.1 | 1.313559008 | 0.054668764 | Over expressed |
| XM_027969571.1 | 1.311518858 | 0.028538033 | Over expressed |
| XM_012175492.2 | 1.31071134  | 0.142567156 | Over expressed |
| XM_012190518.2 | 1.310153508 | 0.044162281 | Over expressed |
| XM_027959704.1 | 1.309649512 | 0.132291047 | Over expressed |
| XM_027977425.1 | 1.309536582 | 0.024259214 | Over expressed |
| XM_027974040.1 | 1.308903248 | 0.062221978 | Over expressed |
| XM_012100083.2 | 1.307726865 | 0.129315715 | Over expressed |
| XM_027958663.1 | 1.305359711 | 0.01795119  | Over expressed |
| XM_027958657.1 | 1.304470119 | 0.000515035 | Over expressed |
| XM_027962323.1 | 1.303579809 | 0.083747551 | Over expressed |
| XM_027976777.1 | 1.303204237 | 0.142676804 | Over expressed |
| XM_004019902.4 | 1.302938279 | 0.104439427 | Over expressed |
| XM_027973349.1 | 1.302467405 | 0.001487448 | Over expressed |
| XM_012098681.3 | 1.302061605 | 0.000921468 | Over expressed |
| XM_004006719.4 | 1.300106878 | 0.001105824 | Over expressed |
| XM_027975751.1 | 1.295773092 | 0.076791544 | Over expressed |
| XM_027969373.1 | 1.29530512  | 0.061730028 | Over expressed |
| NM_001126353.1 | 1.293655556 | 0.03650862  | Over expressed |
| XM_027958723.1 | 1.293036168 | 0.127620913 | Over expressed |
| XM_027959527.1 | 1.292872385 | 0.007961153 | Over expressed |
| XM_015095885.2 | 1.292730381 | 9.17E-08    | Over expressed |
| XM_004022128.4 | 1.290498568 | 0.097178042 | Over expressed |
| XM_027976978.1 | 1.290212089 | 0.139681086 | Over expressed |
| XM_012101347.3 | 1.288642264 | 0.053799132 | Over expressed |
| XM_012187324.2 | 1.287669436 | 0.120737778 | Over expressed |
| XM_027957663.1 | 1.287356902 | 0.101580157 | Over expressed |
| XM_004007040.3 | 1.28711924  | 0.004179779 | Over expressed |
| XM_015101747.2 | 1.286729294 | 0.01681293  | Over expressed |
| XM_027956913.1 | 1.286078871 | 0.000686503 | Over expressed |
| XM_012182917.2 | 1.284453029 | 0.005349469 | Over expressed |
| XM_027957709.1 | 1.283969098 | 0.012707724 | Over expressed |

|                |             |             |                |
|----------------|-------------|-------------|----------------|
| XM_027971918.1 | 1.282822002 | 0.023405321 | Over expressed |
| XM_004023580.3 | 1.282101604 | 0.079801577 | Over expressed |
| XR_001040309.3 | 1.280443703 | 0.096355195 | Over expressed |
| XM_027974202.1 | 1.278281248 | 0.059715981 | Over expressed |
| XR_003590367.1 | 1.27771742  | 0.055296389 | Over expressed |
| XM_027962053.1 | 1.27484816  | 0.006836925 | Over expressed |
| XM_027967873.1 | 1.269974049 | 0.002477824 | Over expressed |
| XM_027960259.1 | 1.267895244 | 0.094029764 | Over expressed |
| XR_001435729.2 | 1.266752489 | 1.37E-06    | Over expressed |
| XM_012104398.2 | 1.263251954 | 0.006164355 | Over expressed |
| XR_003591808.1 | 1.262900492 | 0.008768154 | Over expressed |
| XM_027979486.1 | 1.262591307 | 0.091428569 | Over expressed |
| XM_004006521.4 | 1.261503849 | 0.00220499  | Over expressed |
| XM_027959548.1 | 1.261179665 | 0.091788073 | Over expressed |
| XM_027959207.1 | 1.259192892 | 0.006047766 | Over expressed |
| XM_015100653.2 | 1.257620847 | 0.020084475 | Over expressed |
| XM_004019719.4 | 1.257590986 | 0.048660169 | Over expressed |
| XM_004014369.4 | 1.256832002 | 0.122511419 | Over expressed |
| XM_027965638.1 | 1.2565729   | 0.048781598 | Over expressed |
| XM_004003424.4 | 1.256054186 | 0.089062417 | Over expressed |
| XM_027967099.1 | 1.255552006 | 0.010896328 | Over expressed |
| XM_004012448.4 | 1.25519407  | 0.052379531 | Over expressed |
| XM_012176841.3 | 1.254777681 | 0.031672061 | Over expressed |
| XM_027973444.1 | 1.254198339 | 0.041973645 | Over expressed |
| XM_027967702.1 | 1.251410032 | 0.005429258 | Over expressed |
| XM_004010651.4 | 1.251404724 | 0.126095431 | Over expressed |
| XM_004008553.4 | 1.250608921 | 0.132221452 | Over expressed |
| XM_027962962.1 | 1.250601499 | 0.076325158 | Over expressed |
| XM_027958321.1 | 1.250363854 | 0.126992313 | Over expressed |
| XM_027971849.1 | 1.249352983 | 0.137603646 | Over expressed |
| XM_027968152.1 | 1.247753221 | 0.01433464  | Over expressed |
| XM_027966429.1 | 1.246956472 | 0.133490939 | Over expressed |
| XM_015095535.2 | 1.246891488 | 2.07E-06    | Over expressed |
| XM_027961939.1 | 1.24634338  | 0.147646218 | Over expressed |
| XM_004010314.4 | 1.245555415 | 0.088837651 | Over expressed |
| XM_004015312.4 | 1.245069434 | 0.002270272 | Over expressed |
| XM_027956904.1 | 1.24444728  | 0.061008198 | Over expressed |
| XM_027968942.1 | 1.24403272  | 9.18E-05    | Over expressed |
| XM_012096270.3 | 1.243541022 | 0.107697796 | Over expressed |
| XM_027974792.1 | 1.242997398 | 0.016787434 | Over expressed |
| XM_004007974.2 | 1.242902798 | 0.035169692 | Over expressed |
| XM_012190368.3 | 1.242771977 | 0.108808946 | Over expressed |
| XM_004021914.4 | 1.240026711 | 0.037683243 | Over expressed |
| XM_027960285.1 | 1.239342182 | 0.000520444 | Over expressed |

|                |             |             |                |
|----------------|-------------|-------------|----------------|
| XR_003590712.1 | 1.238390351 | 0.017559004 | Over expressed |
| XM_027961327.1 | 1.237822215 | 0.000169433 | Over expressed |
| XM_015095895.2 | 1.237680339 | 0.0503123   | Over expressed |
| XM_012102212.3 | 1.237241669 | 5.02E-05    | Over expressed |
| XM_012096752.3 | 1.23606447  | 0.036187875 | Over expressed |
| XM_004008406.4 | 1.235355957 | 0.001285659 | Over expressed |
| XM_027956917.1 | 1.235043896 | 0.100174248 | Over expressed |
| XM_027967852.1 | 1.235038977 | 0.080283244 | Over expressed |
| XM_004002351.4 | 1.234780747 | 0.061847952 | Over expressed |
| XM_027965464.1 | 1.234051425 | 0.10197323  | Over expressed |
| XM_004012674.4 | 1.233378157 | 0.120651302 | Over expressed |
| XM_012101890.3 | 1.233284604 | 0.008864064 | Over expressed |
| XR_003588265.1 | 1.23239534  | 0.023939488 | Over expressed |
| XM_027969929.1 | 1.231401911 | 0.143253784 | Over expressed |
| XM_027959937.1 | 1.230244735 | 0.068944747 | Over expressed |
| XM_027956865.1 | 1.229998001 | 0.024241302 | Over expressed |
| XM_027969758.1 | 1.22830306  | 9.64E-06    | Over expressed |
| XM_004015179.4 | 1.227536807 | 0.120153508 | Over expressed |
| XM_012104342.3 | 1.22703252  | 0.095824919 | Over expressed |
| XM_004021260.4 | 1.226988196 | 0.01120223  | Over expressed |
| XM_027961340.1 | 1.226950687 | 0.025010063 | Over expressed |
| XM_004010451.4 | 1.225895228 | 0.050774793 | Over expressed |
| XM_004012238.4 | 1.225554535 | 0.105631895 | Over expressed |
| XM_004015209.4 | 1.225477174 | 0.036012555 | Over expressed |
| XM_027967935.1 | 1.224722894 | 0.037413372 | Over expressed |
| XM_015094704.2 | 1.223109144 | 8.32E-05    | Over expressed |
| XM_004020746.4 | 1.222114975 | 0.025231937 | Over expressed |
| XM_015104005.2 | 1.222103963 | 0.001560273 | Over expressed |
| XM_012099040.3 | 1.218009806 | 0.070494162 | Over expressed |
| XM_027970421.1 | 1.216504137 | 0.033309104 | Over expressed |
| XM_004018967.4 | 1.215827149 | 9.23E-05    | Over expressed |
| XR_003588659.1 | 1.215596297 | 0.000223243 | Over expressed |
| XM_012174672.2 | 1.215136896 | 0.009363893 | Over expressed |
| XM_027977394.1 | 1.214459989 | 0.128740583 | Over expressed |
| XR_003588506.1 | 1.214357314 | 0.117572887 | Over expressed |
| XM_012182071.3 | 1.214042466 | 0.067666038 | Over expressed |
| XM_027974109.1 | 1.213624145 | 0.042918317 | Over expressed |
| XM_027974098.1 | 1.213133392 | 0.059988279 | Over expressed |
| XM_027962048.1 | 1.211768259 | 0.003621121 | Over expressed |
| XM_027956876.1 | 1.210433211 | 0.011511868 | Over expressed |
| NM_001024863.1 | 1.208462994 | 0.013559821 | Over expressed |
| XM_004012641.4 | 1.208356496 | 0.011241574 | Over expressed |
| XM_027969412.1 | 1.207776037 | 0.000596778 | Over expressed |
| XM_004017327.4 | 1.207525425 | 0.128885414 | Over expressed |

|                |             |             |                |
|----------------|-------------|-------------|----------------|
| XM_027976778.1 | 1.206180461 | 0.028161111 | Over expressed |
| XM_004020920.3 | 1.204484801 | 0.012213552 | Over expressed |
| XM_004008568.4 | 1.203478167 | 0.135667057 | Over expressed |
| XM_012178143.2 | 1.202994045 | 0.125007433 | Over expressed |
| XM_027977741.1 | 1.201438246 | 1.06E-05    | Over expressed |
| XM_004002631.4 | 1.19931807  | 0.013626649 | Over expressed |
| XM_027969323.1 | 1.199188534 | 0.14779519  | Over expressed |
| NM_001168634.1 | 1.198540418 | 0.002113844 | Over expressed |
| XM_004015038.4 | 1.19792344  | 0.046888031 | Over expressed |
| XM_027958386.1 | 1.197420063 | 0.137339498 | Over expressed |
| XM_004006291.4 | 1.195239891 | 0.086696977 | Over expressed |
| XM_004013563.4 | 1.195120674 | 0.002558817 | Over expressed |
| XM_027968184.1 | 1.19291894  | 2.33E-05    | Over expressed |
| XM_012184243.2 | 1.191826603 | 0.000654075 | Over expressed |
| XM_027975144.1 | 1.190765135 | 0.000420255 | Over expressed |
| XM_027978597.1 | 1.190057424 | 1.45E-13    | Over expressed |
| XM_004019598.4 | 1.189634    | 0.133584439 | Over expressed |
| XM_027960003.1 | 1.186290746 | 0.054989114 | Over expressed |
| XM_027961188.1 | 1.185870724 | 0.096237181 | Over expressed |
| XM_027974099.1 | 1.185649207 | 0.017565173 | Over expressed |
| XM_004008520.4 | 1.1851041   | 0.073591388 | Over expressed |
| XM_015098651.2 | 1.184525236 | 0.120634334 | Over expressed |
| XR_003586540.1 | 1.182961681 | 0.030212212 | Over expressed |
| XM_015103943.2 | 1.18162072  | 2.98E-22    | Over expressed |
| XM_027959560.1 | 1.180642903 | 0.014505765 | Over expressed |
| XM_004020489.4 | 1.180532289 | 0.049456155 | Over expressed |
| XM_027979633.1 | 1.180487445 | 0.010557192 | Over expressed |
| XM_027978629.1 | 1.179555893 | 1.33E-05    | Over expressed |
| XM_027966316.1 | 1.179471019 | 0.012707724 | Over expressed |
| XM_004001786.3 | 1.178223614 | 0.001257305 | Over expressed |
| XM_004018938.3 | 1.177810512 | 0.007994087 | Over expressed |
| XM_027974303.1 | 1.177762797 | 0.113628781 | Over expressed |
| XM_027959544.1 | 1.177361212 | 0.035144156 | Over expressed |
| XM_027961930.1 | 1.175683808 | 0.003282492 | Over expressed |
| XM_004008697.3 | 1.175353627 | 0.14014596  | Over expressed |
| XM_027971599.1 | 1.175276486 | 0.022811929 | Over expressed |
| XM_004010536.4 | 1.174639912 | 0.049526479 | Over expressed |
| XM_012095529.3 | 1.171203511 | 0.133584439 | Over expressed |
| XM_027969496.1 | 1.16989636  | 0.041498006 | Over expressed |
| XM_004015186.3 | 1.168327872 | 0.028342021 | Over expressed |
| XM_012100976.3 | 1.167223334 | 0.008669331 | Over expressed |
| XM_027965715.1 | 1.166969825 | 0.025010063 | Over expressed |
| XM_027977122.1 | 1.166080384 | 0.000106876 | Over expressed |
| XM_027968167.1 | 1.16588119  | 0.075594242 | Over expressed |

|                |             |             |                |
|----------------|-------------|-------------|----------------|
| XM_004020756.4 | 1.165493899 | 0.041724869 | Over expressed |
| XM_027974269.1 | 1.163288582 | 0.070832792 | Over expressed |
| XM_015091821.2 | 1.163036835 | 0.011886317 | Over expressed |
| XM_004015142.4 | 1.162707271 | 0.134637215 | Over expressed |
| XM_027967566.1 | 1.159841174 | 0.139457359 | Over expressed |
| XM_027977096.1 | 1.158747269 | 0.146406744 | Over expressed |
| XM_027968225.1 | 1.15784934  | 0.015053323 | Over expressed |
| XM_015091944.2 | 1.157216099 | 0.009593081 | Over expressed |
| XM_027965235.1 | 1.15607879  | 0.052914836 | Over expressed |
| XM_027977461.1 | 1.155259524 | 0.002069099 | Over expressed |
| XM_027964059.1 | 1.154196863 | 0.01433464  | Over expressed |
| XM_004015229.4 | 1.153957137 | 0.046637077 | Over expressed |
| XM_027961864.1 | 1.152251781 | 0.060289688 | Over expressed |
| XM_004007255.4 | 1.15098806  | 0.059510019 | Over expressed |
| XM_027959899.1 | 1.150001101 | 0.003617324 | Over expressed |
| XM_027971323.1 | 1.149478315 | 0.107360975 | Over expressed |
| XM_004008565.3 | 1.149317148 | 0.105599617 | Over expressed |
| XM_027973054.1 | 1.148690465 | 0.010203145 | Over expressed |
| XM_027958630.1 | 1.147191111 | 0.111672128 | Over expressed |
| XM_027958839.1 | 1.146813624 | 4.03E-05    | Over expressed |
| XM_027968014.1 | 1.145399312 | 0.028897473 | Over expressed |
| XM_027978792.1 | 1.144665347 | 4.53E-05    | Over expressed |
| XM_004015475.4 | 1.143363573 | 0.019544665 | Over expressed |
| XM_015100619.2 | 1.143363238 | 0.100318365 | Over expressed |
| XM_027967240.1 | 1.143315139 | 0.081116281 | Over expressed |
| XM_027978367.1 | 1.141940423 | 0.020180848 | Over expressed |
| XR_001034045.3 | 1.14152912  | 0.105599617 | Over expressed |
| XM_027967051.1 | 1.140619495 | 0.046812964 | Over expressed |
| XM_027969806.1 | 1.140404803 | 0.033958612 | Over expressed |
| XM_027978260.1 | 1.14039402  | 0.009910192 | Over expressed |
| XM_004008492.4 | 1.140045351 | 0.049526479 | Over expressed |
| XM_012173883.3 | 1.13917814  | 3.34E-06    | Over expressed |
| XM_027974075.1 | 1.138339843 | 0.007994087 | Over expressed |
| XM_004020893.4 | 1.13747175  | 0.0864156   | Over expressed |
| XM_015094997.2 | 1.137355535 | 0.039939834 | Over expressed |
| XM_027976774.1 | 1.137128834 | 0.001527043 | Over expressed |
| XR_003589941.1 | 1.136979571 | 0.034005553 | Over expressed |
| XM_027978753.1 | 1.136238224 | 0.046433031 | Over expressed |
| XM_015100473.2 | 1.135948405 | 0.113125338 | Over expressed |
| XM_004008603.4 | 1.135918133 | 0.095711882 | Over expressed |
| XM_027977252.1 | 1.135030081 | 0.090703348 | Over expressed |
| XM_027956901.1 | 1.134847103 | 0.024565188 | Over expressed |
| XM_027968560.1 | 1.133387852 | 0.126277833 | Over expressed |
| XM_027973663.1 | 1.131576508 | 0.004225515 | Over expressed |

|                |             |             |                |
|----------------|-------------|-------------|----------------|
| XM_027966724.1 | 1.129632051 | 0.011555383 | Over expressed |
| XM_027978300.1 | 1.129057375 | 0.003621121 | Over expressed |
| XM_004019684.4 | 1.12812881  | 0.000291365 | Over expressed |
| XM_027977614.1 | 1.125964058 | 0.060173505 | Over expressed |
| XM_004011143.4 | 1.124675203 | 0.049361328 | Over expressed |
| XM_027976142.1 | 1.123922226 | 6.25E-05    | Over expressed |
| XM_004004150.3 | 1.123268567 | 0.115627782 | Over expressed |
| XM_004002611.4 | 1.121959628 | 0.013842457 | Over expressed |
| XM_015104052.2 | 1.120790324 | 0.012525433 | Over expressed |
| XM_004008507.4 | 1.120575754 | 0.004119139 | Over expressed |
| XM_027963646.1 | 1.118622344 | 0.025179409 | Over expressed |
| XM_027979327.1 | 1.118493845 | 0.057852004 | Over expressed |
| XM_027972382.1 | 1.118187047 | 0.001391057 | Over expressed |
| XM_004010270.4 | 1.116365068 | 0.146122524 | Over expressed |
| XM_004023454.3 | 1.114940255 | 0.074637024 | Over expressed |
| XM_027968834.1 | 1.113816851 | 0.008011398 | Over expressed |
| XM_004015286.4 | 1.112351604 | 0.084118225 | Over expressed |
| XM_004015161.2 | 1.111830761 | 0.082930467 | Over expressed |
| XM_027959996.1 | 1.11092976  | 0.020613284 | Over expressed |
| XM_027965495.1 | 1.110002454 | 0.10249294  | Over expressed |
| XM_004013023.3 | 1.108912231 | 0.010836182 | Over expressed |
| NM_001142511.2 | 1.107603576 | 0.131199935 | Over expressed |
| XM_012104152.3 | 1.106574228 | 0.013130177 | Over expressed |
| XM_004002585.4 | 1.106546759 | 0.000694924 | Over expressed |
| XM_027977393.1 | 1.105878265 | 0.127642024 | Over expressed |
| XM_027971586.1 | 1.101597775 | 0.039043909 | Over expressed |
| XM_027978042.1 | 1.099750742 | 0.000552087 | Over expressed |
| XM_015094798.2 | 1.099267817 | 0.146929191 | Over expressed |
| XM_027959964.1 | 1.09907047  | 0.137884717 | Over expressed |
| XM_004010313.4 | 1.098592158 | 0.142868413 | Over expressed |
| XM_027959705.1 | 1.097108503 | 0.062638247 | Over expressed |
| XM_004019686.4 | 1.096595895 | 0.030175535 | Over expressed |
| XM_004020761.4 | 1.095718274 | 0.110830866 | Over expressed |
| XM_012105396.3 | 1.095158746 | 0.051238831 | Over expressed |
| XM_027965677.1 | 1.094153066 | 0.123706657 | Over expressed |
| XM_004008484.4 | 1.093038696 | 0.012664043 | Over expressed |
| XM_004017098.4 | 1.091883872 | 0.00295007  | Over expressed |
| XM_012104744.3 | 1.090890663 | 0.006481182 | Over expressed |
| XM_004006387.4 | 1.090701562 | 0.004106846 | Over expressed |
| XM_027976474.1 | 1.090550022 | 0.064993576 | Over expressed |
| XM_027961495.1 | 1.089073094 | 0.009049771 | Over expressed |
| XM_004017348.4 | 1.08737066  | 0.06263427  | Over expressed |
| NM_001166201.1 | 1.085997437 | 2.69E-06    | Over expressed |
| NM_001280704.1 | 1.085686561 | 0.051238831 | Over expressed |



|                |             |             |                |
|----------------|-------------|-------------|----------------|
| XM_004006921.4 | 1.085465179 | 0.088837651 | Over expressed |
| XM_004006069.4 | 1.084845303 | 0.039497066 | Over expressed |
| XM_004005586.4 | 1.084550161 | 0.062982021 | Over expressed |
| XM_027978945.1 | 1.082589279 | 0.014886753 | Over expressed |
| XM_012186201.2 | 1.081295235 | 0.055956111 | Over expressed |
| XM_027956850.1 | 1.080468442 | 0.046520631 | Over expressed |
| XM_004011869.3 | 1.079941785 | 0.062748005 | Over expressed |
| XM_004018449.4 | 1.07807875  | 0.032699088 | Over expressed |
| XM_004019646.4 | 1.077740489 | 0.002232244 | Over expressed |
| NM_001145179.1 | 1.074423867 | 0.039487009 | Over expressed |
| XM_027968289.1 | 1.074084086 | 0.040317966 | Over expressed |
| XM_015093274.2 | 1.072858467 | 0.104680605 | Over expressed |
| XM_004015435.4 | 1.072340784 | 0.100318365 | Over expressed |
| XM_012096032.3 | 1.070124108 | 0.019720235 | Over expressed |
| XM_027961411.1 | 1.0700578   | 0.044299126 | Over expressed |
| XM_004008498.3 | 1.069333861 | 0.051826364 | Over expressed |
| XM_004013584.4 | 1.06912613  | 0.052693073 | Over expressed |
| XM_027959339.1 | 1.068812417 | 0.021164466 | Over expressed |
| XM_012098977.3 | 1.068469825 | 0.008456554 | Over expressed |
| XR_003587964.1 | 1.068396144 | 0.026896125 | Over expressed |
| XM_027967902.1 | 1.063893582 | 0.052224211 | Over expressed |
| XM_027975798.1 | 1.063747578 | 0.12256427  | Over expressed |
| XM_027961180.1 | 1.062168907 | 0.056711472 | Over expressed |
| NM_001135926.1 | 1.058839275 | 0.066138598 | Over expressed |
| XM_012189126.3 | 1.056349488 | 0.010237078 | Over expressed |
| XR_003590010.1 | 1.055288338 | 0.055213011 | Over expressed |
| XM_004014632.4 | 1.053375395 | 0.001337455 | Over expressed |
| XM_027964157.1 | 1.053304746 | 0.104981898 | Over expressed |
| XM_027959361.1 | 1.053003356 | 0.003285759 | Over expressed |
| XM_027962939.1 | 1.052997914 | 0.059466235 | Over expressed |
| XM_027978768.1 | 1.051301172 | 0.07218715  | Over expressed |
| NM_001135931.1 | 1.050807561 | 0.129080677 | Over expressed |
| XM_027978620.1 | 1.049893348 | 0.125839733 | Over expressed |
| XM_027977759.1 | 1.048411964 | 0.001714686 | Over expressed |
| XM_004013042.4 | 1.048242273 | 0.111172921 | Over expressed |
| XM_012147961.3 | 1.048095224 | 3.20E-05    | Over expressed |
| XM_027974314.1 | 1.046015585 | 0.032243392 | Over expressed |
| XM_004022064.3 | 1.044070714 | 0.094818409 | Over expressed |
| XM_027957871.1 | 1.044004978 | 0.002054399 | Over expressed |
| XM_027963352.1 | 1.043006274 | 0.135789221 | Over expressed |
| XM_015095053.2 | 1.042373099 | 0.095211005 | Over expressed |
| XM_004017846.4 | 1.040918276 | 4.82E-05    | Over expressed |
| XM_004015418.4 | 1.038632257 | 0.055802697 | Over expressed |
| XM_004005025.3 | 1.036819012 | 0.046917179 | Over expressed |

|                |              |             |                 |
|----------------|--------------|-------------|-----------------|
| XM_027958866.1 | 1.036535548  | 0.000890618 | Over expressed  |
| XM_004005614.4 | 1.034718923  | 0.123265146 | Over expressed  |
| XM_015104234.2 | 1.033877262  | 0.125073826 | Over expressed  |
| XM_012099271.2 | 1.033068731  | 0.081612208 | Over expressed  |
| XM_004020710.4 | 1.029242084  | 0.112206663 | Over expressed  |
| XM_004016091.4 | 1.029172933  | 0.025476205 | Over expressed  |
| XM_027966606.1 | 1.026215239  | 0.10929768  | Over expressed  |
| XM_027959365.1 | 1.026051294  | 0.008069249 | Over expressed  |
| XM_027961938.1 | 1.02543977   | 0.038453148 | Over expressed  |
| XM_004022320.4 | 1.025238019  | 0.087382476 | Over expressed  |
| XM_027967928.1 | 1.023818383  | 0.014742046 | Over expressed  |
| XR_003588740.1 | 1.023569084  | 0.024046223 | Over expressed  |
| XM_027960801.1 | 1.023541508  | 0.057347633 | Over expressed  |
| XM_027969445.1 | 1.023256906  | 0.0897164   | Over expressed  |
| XM_027975816.1 | 1.022559486  | 0.010237078 | Over expressed  |
| XM_004019745.4 | 1.021334579  | 0.032781004 | Over expressed  |
| XM_004008617.4 | 1.021005192  | 0.121459753 | Over expressed  |
| XM_027966105.1 | 1.020334351  | 0.002347029 | Over expressed  |
| XM_004008761.4 | 1.020025885  | 0.00963251  | Over expressed  |
| XM_027967942.1 | 1.019305296  | 0.006326504 | Over expressed  |
| XM_012184828.3 | 1.019245041  | 0.114276131 | Over expressed  |
| XM_004018761.4 | 1.018390945  | 0.121459753 | Over expressed  |
| XM_004013792.4 | 1.018375016  | 0.013599888 | Over expressed  |
| XM_004013066.4 | 1.016991623  | 3.46E-09    | Over expressed  |
| XM_004005740.4 | 1.016064224  | 0.127399632 | Over expressed  |
| XM_027957579.1 | 1.014382861  | 0.033190168 | Over expressed  |
| XM_004014925.3 | 1.01309614   | 0.051076808 | Over expressed  |
| XM_004005564.4 | 1.013066117  | 0.136552173 | Over expressed  |
| XR_003588061.1 | 1.012259848  | 0.149536351 | Over expressed  |
| XR_003590958.1 | 1.011147328  | 0.007163966 | Over expressed  |
| XM_027971139.1 | 1.010478855  | 0.035590589 | Over expressed  |
| XM_027956730.1 | 1.009636814  | 0.000105089 | Over expressed  |
| XM_027975896.1 | 1.006429996  | 0.128337423 | Over expressed  |
| XM_004021423.4 | 1.005807533  | 0.035725856 | Over expressed  |
| XM_015099420.2 | 1.003250666  | 0.082227618 | Over expressed  |
| XM_004018856.3 | 1.00319825   | 0.040192347 | Over expressed  |
| XM_027974446.1 | 1.002098955  | 0.088374281 | Over expressed  |
| XM_015099888.2 | 1.000430953  | 0.009939424 | Over expressed  |
| XM_012107284.3 | -12.21750864 | 3.87E-14    | Under expressed |
| XR_001044470.3 | -12.21521825 | 0.035052823 | Under expressed |
| XM_004002003.4 | -12.17137027 | 0.001799711 | Under expressed |
| XM_027980063.1 | -11.724502   | 0.018455121 | Under expressed |
| XM_004013579.4 | -11.64156576 | 0.022349694 | Under expressed |
| XM_027966360.1 | -11.58378998 | 0.007163966 | Under expressed |

|                |              |             |                 |
|----------------|--------------|-------------|-----------------|
| XM_027956925.1 | -11.27802848 | 3.70E-07    | Under expressed |
| XM_027968298.1 | -11.11034704 | 0.012987121 | Under expressed |
| NM_001161875.1 | -11.05578607 | 0.010237078 | Under expressed |
| XM_004012386.4 | -11.02038409 | 0.010346108 | Under expressed |
| XM_027973218.1 | -10.95645726 | 0.013316878 | Under expressed |
| XM_027971758.1 | -10.9090075  | 8.63E-12    | Under expressed |
| XM_004004539.4 | -10.88696948 | 1.05E-28    | Under expressed |
| XM_012098775.3 | -10.82654073 | 0.014620963 | Under expressed |
| XM_015102717.2 | -10.67874875 | 0.008617931 | Under expressed |
| XM_004010189.3 | -10.66944351 | 1.05E-28    | Under expressed |
| NM_001267886.1 | -10.62543487 | 0.008682363 | Under expressed |
| XM_027969790.1 | -10.60027485 | 0.007861936 | Under expressed |
| XM_027973680.1 | -10.58394686 | 0.009872716 | Under expressed |
| XM_027975993.1 | -10.55034427 | 0.041016503 | Under expressed |
| XM_027957232.1 | -10.53027655 | 2.54E-18    | Under expressed |
| XM_004006637.4 | -10.50760789 | 0.009954469 | Under expressed |
| XM_027959566.1 | -10.46508454 | 0.000292081 | Under expressed |
| XM_012186977.3 | -10.43503046 | 0.012546177 | Under expressed |
| XM_027968824.1 | -10.39938469 | 0.017597182 | Under expressed |
| XM_027972013.1 | -10.3621036  | 0.006521643 | Under expressed |
| XM_027959215.1 | -10.34250915 | 1.51E-11    | Under expressed |
| XM_012099164.3 | -10.32758457 | 4.85E-10    | Under expressed |
| XM_027975678.1 | -10.3207201  | 0.036052651 | Under expressed |
| XM_027980046.1 | -10.31976173 | 0.009241769 | Under expressed |
| XM_004011171.4 | -10.29250491 | 0.0092467   | Under expressed |
| XM_012167463.3 | -10.2888061  | 0.008257512 | Under expressed |
| XM_027975301.1 | -10.28850575 | 0.010237078 | Under expressed |
| XM_015103799.2 | -10.25719309 | 7.61E-11    | Under expressed |
| XM_027980133.1 | -10.20196952 | 0.009658024 | Under expressed |
| XM_027973669.1 | -10.19265347 | 0.008681624 | Under expressed |
| XM_027959807.1 | -10.18417411 | 0.000188204 | Under expressed |
| XM_027979272.1 | -10.17801815 | 0.053579367 | Under expressed |
| XM_012106391.3 | -10.17270159 | 0.009538179 | Under expressed |
| XM_015096615.2 | -10.1685496  | 0.009671194 | Under expressed |
| XM_027968562.1 | -10.14604095 | 0.000194999 | Under expressed |
| XM_015103476.2 | -10.12972541 | 1.21E-13    | Under expressed |
| XM_027957456.1 | -10.1253472  | 0.008805434 | Under expressed |
| XM_015096599.2 | -10.08415178 | 0.013890188 | Under expressed |
| XM_027964706.1 | -10.05323218 | 0.001136631 | Under expressed |
| XM_004016877.4 | -10.02335496 | 0.017170065 | Under expressed |
| XM_004002019.4 | -10.01856334 | 0.037172299 | Under expressed |
| XM_012189031.3 | -10.01551782 | 0.009354523 | Under expressed |
| XM_012181721.3 | -9.986208158 | 0.008961388 | Under expressed |
| XM_004002679.4 | -9.947126928 | 0.073561248 | Under expressed |

|                |              |             |                 |
|----------------|--------------|-------------|-----------------|
| XM_012181269.2 | -9.945090081 | 0.007994087 | Under expressed |
| XM_012183459.2 | -9.923808535 | 0.008204362 | Under expressed |
| XM_027972995.1 | -9.921352257 | 0.009411735 | Under expressed |
| XM_015098202.2 | -9.917594037 | 0.00936524  | Under expressed |
| XR_003590182.1 | -9.914285696 | 0.020714182 | Under expressed |
| XM_027970465.1 | -9.91163552  | 8.93E-15    | Under expressed |
| XM_027979528.1 | -9.91032283  | 0.018737395 | Under expressed |
| XM_012182486.2 | -9.866932078 | 0.011331293 | Under expressed |
| XM_027972363.1 | -9.861984761 | 0.009000653 | Under expressed |
| XM_027973556.1 | -9.812699266 | 0.012801619 | Under expressed |
| XM_027973321.1 | -9.778798235 | 6.24E-08    | Under expressed |
| XM_027973958.1 | -9.768215181 | 1.25E-15    | Under expressed |
| XM_012178737.2 | -9.764213047 | 5.68E-15    | Under expressed |
| XM_015102675.2 | -9.752307111 | 0.008712863 | Under expressed |
| XM_004002026.4 | -9.717252972 | 0.020714526 | Under expressed |
| XM_012166878.3 | -9.62359619  | 0.010297484 | Under expressed |
| XM_027956283.1 | -9.574705732 | 9.01E-10    | Under expressed |
| XM_012112861.3 | -9.56423255  | 1.80E-05    | Under expressed |
| XM_012177073.3 | -9.548998964 | 0.009396789 | Under expressed |
| XM_015096897.2 | -9.546778917 | 0.021945999 | Under expressed |
| XM_004020467.4 | -9.545358989 | 0.028526464 | Under expressed |
| XM_004016919.4 | -9.518852899 | 6.71E-05    | Under expressed |
| XM_027962549.1 | -9.517734228 | 0.015738733 | Under expressed |
| XR_003586476.1 | -9.511867128 | 2.54E-05    | Under expressed |
| XM_027961854.1 | -9.510654656 | 0.041507888 | Under expressed |
| XM_027967636.1 | -9.482711938 | 5.82E-11    | Under expressed |
| XM_012184461.3 | -9.482345744 | 0.010297484 | Under expressed |
| XM_027980049.1 | -9.476906762 | 1.58E-13    | Under expressed |
| XM_012173562.3 | -9.462582446 | 0.010674907 | Under expressed |
| XM_004018287.4 | -9.461210755 | 0.028217668 | Under expressed |
| XM_027961780.1 | -9.446387631 | 0.007352931 | Under expressed |
| XM_012177137.2 | -9.434039232 | 0.008486004 | Under expressed |
| XM_012181001.3 | -9.431339177 | 0.012878753 | Under expressed |
| XM_004004099.4 | -9.427926769 | 1.43E-23    | Under expressed |
| XM_012180730.3 | -9.427266308 | 4.22E-07    | Under expressed |
| XM_012101164.3 | -9.421612855 | 0.010258972 | Under expressed |
| XM_012096956.2 | -9.40791998  | 1.51E-05    | Under expressed |
| XM_012186384.3 | -9.388538752 | 0.048834017 | Under expressed |
| XM_012141038.3 | -9.372288333 | 0.009379891 | Under expressed |
| XM_027957698.1 | -9.371815591 | 1.29E-24    | Under expressed |
| XM_027962333.1 | -9.360372709 | 5.49E-07    | Under expressed |
| XM_012181836.3 | -9.359058714 | 0.012961531 | Under expressed |
| XM_012180815.3 | -9.344036899 | 8.72E-45    | Under expressed |
| XM_027966495.1 | -9.335557497 | 0.039406816 | Under expressed |

|                |              |             |                 |
|----------------|--------------|-------------|-----------------|
| XM_027964674.1 | -9.328927784 | 0.01070508  | Under expressed |
| XM_027973973.1 | -9.323583709 | 0.009333354 | Under expressed |
| XM_027970437.1 | -9.283771373 | 3.26E-21    | Under expressed |
| XM_012158975.3 | -9.282203726 | 0.017779096 | Under expressed |
| XR_003587031.1 | -9.278395605 | 8.53E-37    | Under expressed |
| XM_015099883.2 | -9.274870917 | 0.009685888 | Under expressed |
| XM_012098687.3 | -9.267093136 | 1.82E-16    | Under expressed |
| XM_004002690.3 | -9.245072859 | 0.01648434  | Under expressed |
| XM_027971978.1 | -9.241582058 | 5.49E-07    | Under expressed |
| XM_027962571.1 | -9.227342621 | 0.016272619 | Under expressed |
| XR_001031435.3 | -9.191377757 | 2.17E-07    | Under expressed |
| XM_027961852.1 | -9.178342188 | 0.009479526 | Under expressed |
| XM_004010490.4 | -9.163024733 | 5.65E-14    | Under expressed |
| XM_004004085.3 | -9.162203974 | 1.12E-06    | Under expressed |
| XM_012182384.3 | -9.148958779 | 7.95E-27    | Under expressed |
| XM_004022036.4 | -9.146671173 | 0.009047483 | Under expressed |
| XM_012188683.3 | -9.138875409 | 0.012526807 | Under expressed |
| XM_027961124.1 | -9.127008598 | 0.013647538 | Under expressed |
| XM_012185066.3 | -9.126855975 | 0.009479526 | Under expressed |
| XM_012096778.3 | -9.110854753 | 0.009939424 | Under expressed |
| XM_012177138.2 | -9.062361521 | 0.011412834 | Under expressed |
| XM_027978710.1 | -9.051401685 | 1.91E-09    | Under expressed |
| XM_015103688.2 | -9.043282002 | 3.38E-07    | Under expressed |
| XM_027974035.1 | -9.010529757 | 0.008681624 | Under expressed |
| XM_027962841.1 | -8.993987662 | 0.011782418 | Under expressed |
| XM_027963308.1 | -8.957656701 | 0.010297484 | Under expressed |
| XM_027969077.1 | -8.950914454 | 0.011162479 | Under expressed |
| XM_027969422.1 | -8.928856137 | 0.011678027 | Under expressed |
| XM_012106919.2 | -8.914384574 | 9.39E-06    | Under expressed |
| XM_027974503.1 | -8.888624927 | 0.017658529 | Under expressed |
| XM_012185560.3 | -8.885162801 | 3.37E-08    | Under expressed |
| XM_027977095.1 | -8.863741294 | 0.020798222 | Under expressed |
| XM_027963539.1 | -8.854978596 | 0.016595766 | Under expressed |
| XM_012185222.3 | -8.844034578 | 0.007275229 | Under expressed |
| XM_027972409.1 | -8.843912821 | 0.010237078 | Under expressed |
| XM_004017934.4 | -8.8437191   | 0.018545723 | Under expressed |
| XM_027957534.1 | -8.843587167 | 1.88E-14    | Under expressed |
| XM_012179718.3 | -8.839010133 | 2.77E-19    | Under expressed |
| XM_012181025.3 | -8.822707558 | 0.010169791 | Under expressed |
| XM_027973650.1 | -8.818632837 | 0.011322098 | Under expressed |
| XM_027959153.1 | -8.81485934  | 6.29E-28    | Under expressed |
| XM_015098132.2 | -8.811320253 | 0.048100684 | Under expressed |
| XM_027969232.1 | -8.797255341 | 0.007398033 | Under expressed |
| XM_027962338.1 | -8.786028247 | 2.54E-18    | Under expressed |

|                |              |             |                 |
|----------------|--------------|-------------|-----------------|
| XM_027967698.1 | -8.777174057 | 0.009134949 | Under expressed |
| XM_004016499.4 | -8.766957483 | 0.000979204 | Under expressed |
| XM_027976675.1 | -8.747525284 | 0.081729291 | Under expressed |
| XM_012179026.2 | -8.73017909  | 0.017229345 | Under expressed |
| XM_027975572.1 | -8.726255152 | 0.007874009 | Under expressed |
| XM_012107667.2 | -8.71477183  | 0.00966697  | Under expressed |
| XM_012096966.2 | -8.699488549 | 3.13E-05    | Under expressed |
| XM_027962422.1 | -8.68890241  | 0.000861088 | Under expressed |
| XM_012096928.3 | -8.68029023  | 0.008363405 | Under expressed |
| XM_015099773.2 | -8.678749278 | 0.016610802 | Under expressed |
| XM_015105013.2 | -8.644845867 | 0.013839825 | Under expressed |
| XM_012132272.3 | -8.638719545 | 0.013689236 | Under expressed |
| XM_027978723.1 | -8.63681801  | 0.025129359 | Under expressed |
| XM_027972374.1 | -8.62808852  | 9.75E-06    | Under expressed |
| XM_027970914.1 | -8.620009037 | 0.02580157  | Under expressed |
| NM_001130937.1 | -8.611909536 | 0.012939778 | Under expressed |
| XM_012102903.3 | -8.608892254 | 0.029903906 | Under expressed |
| XM_027971688.1 | -8.607028959 | 0.017486549 | Under expressed |
| XM_012095278.3 | -8.599425019 | 0.010182337 | Under expressed |
| XM_004011430.4 | -8.597948255 | 0.011964976 | Under expressed |
| XM_027978564.1 | -8.588965847 | 9.17E-08    | Under expressed |
| XM_012187094.2 | -8.576175486 | 0.009613043 | Under expressed |
| XM_012178596.2 | -8.576083897 | 0.011704526 | Under expressed |
| XM_027976136.1 | -8.570077312 | 0.03550659  | Under expressed |
| XM_027969440.1 | -8.563163084 | 0.006931981 | Under expressed |
| XM_012101386.3 | -8.539725599 | 0.03639558  | Under expressed |
| XM_012177785.3 | -8.484159246 | 1.51E-05    | Under expressed |
| XM_027972923.1 | -8.475198029 | 0.009968025 | Under expressed |
| NM_001161863.1 | -8.460243981 | 0.012227837 | Under expressed |
| XM_027972592.1 | -8.455853636 | 4.61E-11    | Under expressed |
| XM_027960981.1 | -8.440773945 | 0.000618342 | Under expressed |
| XM_015096946.2 | -8.396156483 | 0.018727344 | Under expressed |
| XM_012105058.3 | -8.39078535  | 4.16E-78    | Under expressed |
| XM_012186196.3 | -8.389506961 | 8.15E-11    | Under expressed |
| XM_004017259.4 | -8.36427919  | 0.01953568  | Under expressed |
| XM_027970749.1 | -8.361446883 | 0.060934593 | Under expressed |
| XM_012182825.3 | -8.355345856 | 0.01130395  | Under expressed |
| XM_027979257.1 | -8.354253683 | 0.012538451 | Under expressed |
| XM_012188216.3 | -8.354118888 | 8.89E-06    | Under expressed |
| XM_012179569.2 | -8.348356583 | 0.011241574 | Under expressed |
| XM_012184129.3 | -8.343956481 | 0.014327792 | Under expressed |
| XM_027965540.1 | -8.327412987 | 0.00538775  | Under expressed |
| XM_012095359.3 | -8.29492462  | 0.105631895 | Under expressed |
| XM_027970887.1 | -8.293021105 | 0.052730363 | Under expressed |

|                |              |             |                 |
|----------------|--------------|-------------|-----------------|
| XM_027974491.1 | -8.267352125 | 0.014957544 | Under expressed |
| XM_004017226.4 | -8.264431965 | 0.000163976 | Under expressed |
| XM_012180705.2 | -8.26045574  | 0.017406573 | Under expressed |
| XM_004021347.3 | -8.254997287 | 0.013994712 | Under expressed |
| XM_027977518.1 | -8.251708038 | 1.54E-09    | Under expressed |
| XM_027978987.1 | -8.225473182 | 0.043432759 | Under expressed |
| XM_012096181.3 | -8.215943777 | 0.021182952 | Under expressed |
| XM_012188708.3 | -8.172357412 | 0.024878407 | Under expressed |
| XM_027975032.1 | -8.169978091 | 0.008581049 | Under expressed |
| XM_012096404.2 | -8.158504374 | 0.012216998 | Under expressed |
| XM_012188916.2 | -8.152107335 | 0.024899733 | Under expressed |
| XM_027975568.1 | -8.09665611  | 0.02431223  | Under expressed |
| XM_012105509.3 | -8.088284485 | 0.0010131   | Under expressed |
| XM_004009747.4 | -8.059502973 | 0.007994087 | Under expressed |
| XM_027970909.1 | -8.037163232 | 3.72E-17    | Under expressed |
| XM_004004666.3 | -8.001240512 | 8.44E-07    | Under expressed |
| NM_001112818.1 | -7.995094328 | 0.005305707 | Under expressed |
| XM_012178975.3 | -7.979734437 | 5.05E-17    | Under expressed |
| XM_004018359.3 | -7.977003516 | 3.38E-07    | Under expressed |
| XM_027963238.1 | -7.94055025  | 0.012664043 | Under expressed |
| XM_027979373.1 | -7.937544827 | 0.010789577 | Under expressed |
| XM_027971159.1 | -7.934088858 | 0.043085938 | Under expressed |
| XM_012178316.2 | -7.932998075 | 0.019365815 | Under expressed |
| XM_012178375.3 | -7.896538844 | 0.010480428 | Under expressed |
| XM_027960242.1 | -7.86953706  | 0.01455937  | Under expressed |
| XM_015091837.2 | -7.865732866 | 0.02076635  | Under expressed |
| XR_003591027.1 | -7.863108686 | 0.076165361 | Under expressed |
| XM_004011222.3 | -7.836022449 | 0.035744042 | Under expressed |
| XM_027961606.1 | -7.833477489 | 0.023785588 | Under expressed |
| XR_003586905.1 | -7.832664545 | 3.02E-11    | Under expressed |
| XM_027976732.1 | -7.796603667 | 1.96E-05    | Under expressed |
| XM_027963556.1 | -7.792944117 | 0.013999152 | Under expressed |
| XM_027962124.1 | -7.787444243 | 0.017406573 | Under expressed |
| XM_027973781.1 | -7.779148208 | 0.009689926 | Under expressed |
| XM_027979480.1 | -7.761480496 | 0.013071557 | Under expressed |
| XM_027966095.1 | -7.754516949 | 0.021575221 | Under expressed |
| XM_027973000.1 | -7.743370728 | 8.15E-11    | Under expressed |
| XM_027966939.1 | -7.74275755  | 0.012656651 | Under expressed |
| XM_027963867.1 | -7.719275719 | 5.67E-11    | Under expressed |
| XM_012122753.2 | -7.703247649 | 0.014161487 | Under expressed |
| XM_012175400.2 | -7.692371789 | 0.059060401 | Under expressed |
| XM_004020844.4 | -7.677535322 | 1.05E-08    | Under expressed |
| XM_004022319.4 | -7.639706392 | 0.051826364 | Under expressed |
| XM_027976626.1 | -7.638045183 | 0.090925695 | Under expressed |

|                |              |             |                 |
|----------------|--------------|-------------|-----------------|
| XM_012119403.3 | -7.626834806 | 0.032971924 | Under expressed |
| XM_027961083.1 | -7.607933152 | 0.005492587 | Under expressed |
| XM_012190459.3 | -7.593019658 | 0.026896125 | Under expressed |
| XM_004003332.4 | -7.591932846 | 6.25E-05    | Under expressed |
| XM_027966777.1 | -7.555107757 | 0.099721279 | Under expressed |
| XM_012096345.3 | -7.535123954 | 4.79E-06    | Under expressed |
| XM_027977429.1 | -7.528387299 | 0.012467379 | Under expressed |
| XM_027978660.1 | -7.515188382 | 0.04590634  | Under expressed |
| XM_012097057.2 | -7.514046133 | 0.014161487 | Under expressed |
| XM_027967807.1 | -7.500921462 | 0.008864064 | Under expressed |
| XR_003586502.1 | -7.488108154 | 0.012002035 | Under expressed |
| XM_012119432.3 | -7.475130366 | 0.020223385 | Under expressed |
| XM_012096180.3 | -7.452721233 | 0.010012584 | Under expressed |
| XM_004010535.4 | -7.424738936 | 0.018122711 | Under expressed |
| XM_004022177.4 | -7.411611931 | 0.023028172 | Under expressed |
| XM_027967804.1 | -7.404906527 | 0.000844295 | Under expressed |
| XM_027960326.1 | -7.331350264 | 0.03674594  | Under expressed |
| XM_012160811.3 | -7.316556593 | 0.017989728 | Under expressed |
| XM_027972992.1 | -7.311622433 | 0.01556651  | Under expressed |
| XM_027956582.1 | -7.304344596 | 0.010159422 | Under expressed |
| XM_027968697.1 | -7.290502863 | 0.01260265  | Under expressed |
| XM_027964985.1 | -7.281081841 | 0.016021313 | Under expressed |
| XM_012174144.3 | -7.27379308  | 0.01666636  | Under expressed |
| XM_027970571.1 | -7.271794073 | 0.081837807 | Under expressed |
| XM_027969332.1 | -7.189841773 | 0.017658529 | Under expressed |
| XM_015098899.2 | -7.188960958 | 0.013316878 | Under expressed |
| XM_012101865.3 | -7.188541721 | 0.045026491 | Under expressed |
| XM_027970388.1 | -7.18476066  | 0.03158679  | Under expressed |
| XM_027972412.1 | -7.13341662  | 0.000312229 | Under expressed |
| XM_004017197.4 | -7.132524307 | 0.022970593 | Under expressed |
| NM_001162562.1 | -7.105881931 | 0.038616448 | Under expressed |
| XM_027963735.1 | -7.093827798 | 0.059518391 | Under expressed |
| XM_027967029.1 | -7.075102911 | 0.009134949 | Under expressed |
| XM_027978155.1 | -7.033152175 | 0.054004676 | Under expressed |
| XM_027957826.1 | -7.022341665 | 0.000144801 | Under expressed |
| XM_027970693.1 | -6.993109642 | 0.089666629 | Under expressed |
| XM_027968617.1 | -6.976511402 | 0.013163841 | Under expressed |
| XM_015095234.2 | -6.953561149 | 0.046260646 | Under expressed |
| XM_004016510.4 | -6.94871377  | 0.138721593 | Under expressed |
| XM_015099846.2 | -6.923504397 | 0.014635662 | Under expressed |
| XM_027966762.1 | -6.916906218 | 0.026594279 | Under expressed |
| XM_027975891.1 | -6.912603361 | 0.057974438 | Under expressed |
| XM_015103130.2 | -6.900688923 | 0.051563883 | Under expressed |
| XM_012174548.2 | -6.858491036 | 0.004144246 | Under expressed |



|                |              |             |                 |
|----------------|--------------|-------------|-----------------|
| XM_027964420.1 | -6.830892166 | 0.033102655 | Under expressed |
| XM_012153155.3 | -6.818166507 | 4.41E-06    | Under expressed |
| XM_012188684.3 | -6.816008592 | 0.001665501 | Under expressed |
| XM_027972519.1 | -6.806747314 | 0.000582469 | Under expressed |
| XM_027967806.1 | -6.755051736 | 0.028869287 | Under expressed |
| XM_012105545.2 | -6.624465467 | 0.10641625  | Under expressed |
| XM_027965855.1 | -6.608228329 | 0.082101819 | Under expressed |
| XM_015099342.2 | -6.577671774 | 0.000457809 | Under expressed |
| XM_004002670.4 | -6.547582663 | 7.60E-09    | Under expressed |
| NM_001129735.1 | -6.491410575 | 0.003904494 | Under expressed |
| XM_027975516.1 | -6.481626338 | 0.060691503 | Under expressed |
| XM_012097256.3 | -6.457640107 | 0.014012404 | Under expressed |
| XM_015093117.2 | -6.45038556  | 0.102690495 | Under expressed |
| XR_001041729.2 | -6.444011004 | 0.011386162 | Under expressed |
| XM_012096086.3 | -6.385646425 | 0.107697796 | Under expressed |
| XM_012096676.2 | -6.383594938 | 0.01433464  | Under expressed |
| NM_001009241.1 | -6.344646655 | 0.077524379 | Under expressed |
| XM_027967441.1 | -6.290485656 | 0.001393315 | Under expressed |
| XM_027974343.1 | -6.280464483 | 0.143047857 | Under expressed |
| XM_027966753.1 | -6.273388198 | 0.050774793 | Under expressed |
| XM_004020845.3 | -6.215657331 | 0.000238107 | Under expressed |
| XM_012095100.2 | -6.170739949 | 0.052886625 | Under expressed |
| XM_004013958.4 | -6.166517086 | 0.085798345 | Under expressed |
| XR_003586500.1 | -6.129370186 | 0.070494162 | Under expressed |
| XM_004012878.4 | -6.112441578 | 0.07677153  | Under expressed |
| XM_004010192.4 | -6.080373544 | 5.56E-06    | Under expressed |
| XM_015102288.2 | -6.06191625  | 6.02E-07    | Under expressed |
| XM_015104334.2 | -6.010292628 | 0.070490227 | Under expressed |
| XM_027958880.1 | -6.007323764 | 0.13405549  | Under expressed |
| XM_027957771.1 | -5.992715285 | 0.041973645 | Under expressed |
| XM_027980054.1 | -5.989651049 | 1.62E-24    | Under expressed |
| XM_015104435.2 | -5.965362681 | 6.73E-06    | Under expressed |
| XM_012185551.3 | -5.924973964 | 0.042807627 | Under expressed |
| XM_004013806.3 | -5.861554593 | 0.081837807 | Under expressed |
| XM_027967168.1 | -5.852878377 | 0.00488023  | Under expressed |
| XR_003591174.1 | -5.847494949 | 0.054391829 | Under expressed |
| XM_027972165.1 | -5.822712257 | 0.079801577 | Under expressed |
| XM_027972362.1 | -5.776971465 | 0.04270552  | Under expressed |
| XM_012105243.3 | -5.767712103 | 0.045166005 | Under expressed |
| XM_027972908.1 | -5.729308237 | 0.016029521 | Under expressed |
| XM_004013612.4 | -5.714236664 | 0.002688439 | Under expressed |
| XM_027967473.1 | -5.70925125  | 0.055677671 | Under expressed |
| XM_012183078.3 | -5.660477908 | 0.015682334 | Under expressed |
| XM_004013839.3 | -5.620968566 | 0.001506081 | Under expressed |

|                |              |             |                 |
|----------------|--------------|-------------|-----------------|
| XM_027975251.1 | -5.599134448 | 0.005698539 | Under expressed |
| XM_015096572.2 | -5.593207489 | 0.114050461 | Under expressed |
| XM_012178689.3 | -5.583349567 | 0.130658931 | Under expressed |
| XM_012104587.3 | -5.556578114 | 0.024832561 | Under expressed |
| XM_012178585.3 | -5.547411622 | 0.105599617 | Under expressed |
| XR_001041766.3 | -5.545960406 | 0.046514385 | Under expressed |
| XM_012187651.2 | -5.536198185 | 0.062261263 | Under expressed |
| XM_004002929.4 | -5.515337916 | 0.0271568   | Under expressed |
| XM_027967502.1 | -5.504625511 | 0.004094489 | Under expressed |
| XM_027962105.1 | -5.397400119 | 0.031014591 | Under expressed |
| XM_004016930.4 | -5.36892955  | 4.41E-05    | Under expressed |
| XM_004007889.4 | -5.345204399 | 0.138021514 | Under expressed |
| XM_027971199.1 | -5.328789918 | 0.122696693 | Under expressed |
| XR_003588133.1 | -5.321505371 | 0.094230576 | Under expressed |
| XR_003591779.1 | -5.320181376 | 0.082654258 | Under expressed |
| XM_027976400.1 | -5.319456578 | 0.033993234 | Under expressed |
| XR_003586427.1 | -5.299362635 | 1.11E-05    | Under expressed |
| XM_027966141.1 | -5.296503614 | 0.114734629 | Under expressed |
| XM_027971071.1 | -5.282542664 | 0.07833658  | Under expressed |
| XM_027961922.1 | -5.265188151 | 0.127925516 | Under expressed |
| XM_015099709.2 | -5.262814628 | 2.60E-05    | Under expressed |
| NM_001040286.1 | -5.259174625 | 9.08E-09    | Under expressed |
| XM_012096734.3 | -5.258457618 | 0.142857232 | Under expressed |
| XM_027964413.1 | -5.234354635 | 3.10E-05    | Under expressed |
| XM_012173839.3 | -5.221999542 | 0.11401293  | Under expressed |
| XM_012187843.3 | -5.213209347 | 0.137339498 | Under expressed |
| XM_027971470.1 | -5.179511048 | 0.063903909 | Under expressed |
| XM_027976275.1 | -5.164313092 | 0.127620913 | Under expressed |
| XM_027957924.1 | -5.134613185 | 0.04962176  | Under expressed |
| XR_003589456.1 | -5.107079061 | 0.005257165 | Under expressed |
| XM_027962288.1 | -5.098518884 | 0.096996407 | Under expressed |
| XR_003587012.1 | -5.092158818 | 0.01097913  | Under expressed |
| XM_027977321.1 | -5.07629899  | 0.027095428 | Under expressed |
| XM_015101844.2 | -5.07499549  | 0.102275821 | Under expressed |
| XM_012178373.2 | -5.062739765 | 0.147774338 | Under expressed |
| XM_027956989.1 | -5.042722469 | 0.078748788 | Under expressed |
| XR_003586526.1 | -5.033955307 | 0.101138774 | Under expressed |
| XM_012179760.2 | -5.008218288 | 0.043427162 | Under expressed |
| XM_027970573.1 | -5.006049602 | 0.086048531 | Under expressed |
| XM_027957700.1 | -4.983950254 | 0.073591388 | Under expressed |
| XM_027976272.1 | -4.959473353 | 0.024241302 | Under expressed |
| XM_027960637.1 | -4.957839353 | 0.093284742 | Under expressed |
| XM_027977912.1 | -4.954250533 | 0.076791544 | Under expressed |
| XM_012098870.2 | -4.919067464 | 0.043359338 | Under expressed |

|                |              |             |                 |
|----------------|--------------|-------------|-----------------|
| XM_004016241.3 | -4.91225828  | 0.072504325 | Under expressed |
| XM_004017927.4 | -4.906074862 | 1.88E-06    | Under expressed |
| XM_027979948.1 | -4.896088043 | 0.072817495 | Under expressed |
| NM_001306119.1 | -4.895656927 | 0.04452835  | Under expressed |
| XM_012097458.3 | -4.87680562  | 0.008469132 | Under expressed |
| XM_027976731.1 | -4.855324591 | 0.122621563 | Under expressed |
| XM_027965987.1 | -4.854367249 | 0.10197323  | Under expressed |
| XM_015098260.2 | -4.827243155 | 0.006047766 | Under expressed |
| XM_004016165.4 | -4.811898358 | 0.136176227 | Under expressed |
| XM_015101316.2 | -4.800369623 | 0.039650993 | Under expressed |
| XM_027968528.1 | -4.772992515 | 0.08185758  | Under expressed |
| XM_027968756.1 | -4.764657446 | 0.031508716 | Under expressed |
| XM_012102946.3 | -4.756806608 | 0.016999286 | Under expressed |
| XM_027963394.1 | -4.740287247 | 0.107687252 | Under expressed |
| XM_027969914.1 | -4.714799258 | 0.05098375  | Under expressed |
| XM_012103062.3 | -4.687994399 | 0.046204095 | Under expressed |
| XM_015097842.2 | -4.681145519 | 0.036203875 | Under expressed |
| XM_027964608.1 | -4.638120364 | 0.134637215 | Under expressed |
| XR_003588694.1 | -4.626736991 | 0.000113335 | Under expressed |
| XM_012177589.3 | -4.625315913 | 0.029106149 | Under expressed |
| XM_027973620.1 | -4.625302986 | 0.034812776 | Under expressed |
| XR_001039498.3 | -4.619451147 | 3.37E-25    | Under expressed |
| XM_012179622.3 | -4.613267574 | 0.088175326 | Under expressed |
| NM_001009339.1 | -4.608449485 | 0.123593076 | Under expressed |
| XM_004002224.3 | -4.592963287 | 0.082945208 | Under expressed |
| NM_001145178.1 | -4.571609749 | 0.000343544 | Under expressed |
| XM_027958956.1 | -4.57129581  | 0.117022896 | Under expressed |
| XR_003590743.1 | -4.552744277 | 0.059374232 | Under expressed |
| XM_015100446.2 | -4.540233945 | 0.071725236 | Under expressed |
| XR_003591315.1 | -4.498961729 | 0.006803773 | Under expressed |
| XM_012178876.3 | -4.496507253 | 0.038217416 | Under expressed |
| XR_003590880.1 | -4.496117743 | 0.01120223  | Under expressed |
| XM_004002877.4 | -4.477126878 | 0.095824919 | Under expressed |
| XM_027971084.1 | -4.470258332 | 0.146405568 | Under expressed |
| XM_027964019.1 | -4.465080678 | 0.136015816 | Under expressed |
| XR_003586524.1 | -4.463113772 | 0.06570014  | Under expressed |
| XM_015092133.2 | -4.45911492  | 0.118464172 | Under expressed |
| XM_027968128.1 | -4.45436624  | 0.137664572 | Under expressed |
| XM_027959934.1 | -4.453574444 | 0.123706657 | Under expressed |
| XM_004016162.4 | -4.447394243 | 0.082930467 | Under expressed |
| XM_015093479.2 | -4.423073714 | 0.06612904  | Under expressed |
| XM_027966560.1 | -4.420406096 | 1.95E-07    | Under expressed |
| XM_027977125.1 | -4.392511755 | 0.000644421 | Under expressed |
| XM_012117704.3 | -4.3909524   | 0.070939177 | Under expressed |

|                |              |             |                 |
|----------------|--------------|-------------|-----------------|
| XM_012097668.2 | -4.386149815 | 0.028744159 | Under expressed |
| XM_012116929.3 | -4.369234177 | 0.003224408 | Under expressed |
| XM_027968629.1 | -4.33976227  | 0.05578336  | Under expressed |
| XM_027956390.1 | -4.339473941 | 0.117301299 | Under expressed |
| XM_027970711.1 | -4.338071395 | 0.111212159 | Under expressed |
| XM_027964191.1 | -4.337599131 | 0.098453336 | Under expressed |
| XM_004004534.4 | -4.316750856 | 0.004642387 | Under expressed |
| XM_004013227.4 | -4.29821483  | 0.135704162 | Under expressed |
| NM_001009763.1 | -4.284619812 | 0.031508716 | Under expressed |
| XR_003591795.1 | -4.283450622 | 0.001391148 | Under expressed |
| XM_027957967.1 | -4.232119679 | 0.050943756 | Under expressed |
| XM_015103394.2 | -4.215759455 | 0.082930467 | Under expressed |
| XM_012184115.3 | -4.186862225 | 0.032060989 | Under expressed |
| XM_027963535.1 | -4.172406946 | 0.037073994 | Under expressed |
| XM_027958888.1 | -4.160954177 | 0.076791544 | Under expressed |
| XM_027964418.1 | -4.147972062 | 0.098121422 | Under expressed |
| XR_003590477.1 | -4.113037726 | 0.084518502 | Under expressed |
| XM_027958009.1 | -4.097341308 | 1.22E-05    | Under expressed |
| XR_003589581.1 | -4.092741503 | 0.097239536 | Under expressed |
| XM_027975429.1 | -4.084370141 | 0.120415948 | Under expressed |
| XR_003587626.1 | -4.084100036 | 0.022102665 | Under expressed |
| XM_015096507.2 | -4.074941039 | 0.045868386 | Under expressed |
| XM_027966831.1 | -4.071513715 | 0.008252168 | Under expressed |
| XM_027965853.1 | -4.070681032 | 0.093867612 | Under expressed |
| XM_012099477.2 | -4.058640741 | 0.148620498 | Under expressed |
| XR_003590754.1 | -4.015771876 | 0.025242388 | Under expressed |
| NM_001038622.1 | -4.008866266 | 9.62E-07    | Under expressed |
| XM_004011358.4 | -4.006446299 | 0.054700532 | Under expressed |
| XM_012176795.2 | -4.005325461 | 0.009921819 | Under expressed |
| XM_027957226.1 | -3.994745115 | 0.10706153  | Under expressed |
| XM_027968364.1 | -3.98753412  | 0.11382484  | Under expressed |
| XM_004004537.4 | -3.983303641 | 0.018282009 | Under expressed |
| XR_003590267.1 | -3.981667257 | 0.008845687 | Under expressed |
| XM_004020464.4 | -3.966429263 | 0.141928052 | Under expressed |
| XM_012181465.3 | -3.9626878   | 0.078271933 | Under expressed |
| XM_004014567.4 | -3.956091555 | 0.149437976 | Under expressed |
| XR_001434733.2 | -3.951334926 | 0.053683983 | Under expressed |
| XR_001433796.2 | -3.943241584 | 0.133011493 | Under expressed |
| XR_003589488.1 | -3.942383391 | 0.087444049 | Under expressed |
| XM_004022406.4 | -3.935674342 | 0.071849297 | Under expressed |
| XM_012104134.3 | -3.928604138 | 0.070416907 | Under expressed |
| XM_012186999.3 | -3.927280865 | 0.053156568 | Under expressed |
| XR_003587561.1 | -3.921413941 | 0.067525111 | Under expressed |
| XM_027977570.1 | -3.921146699 | 0.106605467 | Under expressed |

|                |              |             |                 |
|----------------|--------------|-------------|-----------------|
| XR_003586579.1 | -3.919461192 | 0.051798465 | Under expressed |
| XM_027961733.1 | -3.917070343 | 0.122098693 | Under expressed |
| XM_027958728.1 | -3.914014313 | 0.000339147 | Under expressed |
| XM_027971753.1 | -3.913861221 | 0.034812776 | Under expressed |
| XM_012099026.3 | -3.911197041 | 0.020582879 | Under expressed |
| XM_004002077.4 | -3.903718741 | 0.022102665 | Under expressed |
| XM_027973595.1 | -3.903382311 | 1.28E-05    | Under expressed |
| XM_012103274.3 | -3.902433763 | 0.000168012 | Under expressed |
| XM_027979678.1 | -3.887285642 | 0.012538451 | Under expressed |
| XR_003586875.1 | -3.881203917 | 0.081834057 | Under expressed |
| XM_012190354.3 | -3.868775271 | 0.058934401 | Under expressed |
| XM_015102700.2 | -3.857177483 | 0.039508055 | Under expressed |
| XM_027970861.1 | -3.838938973 | 0.001594503 | Under expressed |
| XM_027980319.1 | -3.824053699 | 0.043073883 | Under expressed |
| XM_027980252.1 | -3.794517938 | 0.025405313 | Under expressed |
| XM_004014990.4 | -3.791642614 | 0.12534926  | Under expressed |
| XM_027964736.1 | -3.791482771 | 0.023732179 | Under expressed |
| XM_027972650.1 | -3.790014153 | 0.00017145  | Under expressed |
| XR_003591311.1 | -3.775932339 | 0.094439677 | Under expressed |
| XM_027970582.1 | -3.760495257 | 0.133490939 | Under expressed |
| XM_027973868.1 | -3.746941888 | 0.13313411  | Under expressed |
| XM_004002928.4 | -3.733534617 | 0.077921291 | Under expressed |
| XM_027959031.1 | -3.726656542 | 0.132782558 | Under expressed |
| XM_015094933.2 | -3.717111733 | 0.075299708 | Under expressed |
| XM_012184537.3 | -3.710038197 | 0.094967488 | Under expressed |
| XM_027966645.1 | -3.709657728 | 0.0010131   | Under expressed |
| XM_027975152.1 | -3.697369774 | 0.128596432 | Under expressed |
| XM_027964792.1 | -3.696179755 | 0.006495216 | Under expressed |
| XM_015102004.2 | -3.696133539 | 0.051642296 | Under expressed |
| XM_027963141.1 | -3.674697338 | 0.140326578 | Under expressed |
| XR_003590498.1 | -3.67393441  | 0.114734629 | Under expressed |
| XM_027972150.1 | -3.670585323 | 0.038626055 | Under expressed |
| XM_015099371.2 | -3.662180881 | 0.065325801 | Under expressed |
| XM_027962796.1 | -3.661322494 | 0.057812527 | Under expressed |
| XM_027971473.1 | -3.65508183  | 0.025010063 | Under expressed |
| XM_027971093.1 | -3.649371006 | 0.083725294 | Under expressed |
| XM_004021920.4 | -3.644373617 | 0.139019656 | Under expressed |
| XM_012099381.3 | -3.643875598 | 0.079710872 | Under expressed |
| XM_027972889.1 | -3.633179087 | 0.069503187 | Under expressed |
| XM_012186045.3 | -3.631338841 | 0.08771212  | Under expressed |
| XM_027963440.1 | -3.629717702 | 0.093360417 | Under expressed |
| XM_012099802.3 | -3.627752206 | 0.001019594 | Under expressed |
| XM_027977107.1 | -3.617828959 | 0.001814838 | Under expressed |
| XR_003588425.1 | -3.594520085 | 0.10197323  | Under expressed |

|                |              |             |                 |
|----------------|--------------|-------------|-----------------|
| XM_015099701.2 | -3.58169075  | 0.127620913 | Under expressed |
| XM_004007898.4 | -3.576669541 | 0.046917179 | Under expressed |
| XM_012139105.3 | -3.575719542 | 0.033198502 | Under expressed |
| XM_027980305.1 | -3.567150396 | 0.012213552 | Under expressed |
| XM_027962289.1 | -3.544968183 | 0.035033069 | Under expressed |
| XM_027972582.1 | -3.541745857 | 1.80E-05    | Under expressed |
| XR_003591089.1 | -3.539139825 | 0.145341556 | Under expressed |
| XM_012145231.3 | -3.536287079 | 0.031159511 | Under expressed |
| XM_027969368.1 | -3.533184511 | 0.112501745 | Under expressed |
| XM_027970993.1 | -3.528187457 | 0.11401293  | Under expressed |
| XM_015097680.2 | -3.51199581  | 0.116871668 | Under expressed |
| XM_027962716.1 | -3.507156224 | 0.142679959 | Under expressed |
| XR_003591766.1 | -3.492910636 | 0.03760585  | Under expressed |
| XR_003586552.1 | -3.479907799 | 0.084608164 | Under expressed |
| XM_027960518.1 | -3.475013255 | 5.47E-07    | Under expressed |
| XM_027960409.1 | -3.469677258 | 0.127995335 | Under expressed |
| XM_027960039.1 | -3.469204981 | 0.11980626  | Under expressed |
| XM_027979577.1 | -3.467332949 | 0.002805783 | Under expressed |
| XM_027963688.1 | -3.466993912 | 0.016803344 | Under expressed |
| XM_012105328.3 | -3.458889129 | 0.108417189 | Under expressed |
| XM_027968349.1 | -3.454043339 | 0.027309206 | Under expressed |
| XM_027962740.1 | -3.450450733 | 0.019507638 | Under expressed |
| XR_003589761.1 | -3.446531368 | 0.082654258 | Under expressed |
| XR_003585663.1 | -3.434358453 | 0.003627491 | Under expressed |
| XM_012177580.3 | -3.419447675 | 0.007163966 | Under expressed |
| XM_012117978.3 | -3.416906093 | 0.011309071 | Under expressed |
| XM_012100965.3 | -3.407054901 | 0.053574869 | Under expressed |
| XM_027957301.1 | -3.406830385 | 0.142139877 | Under expressed |
| XM_027958354.1 | -3.398869072 | 0.117347728 | Under expressed |
| NM_001174111.1 | -3.397648985 | 0.009009317 | Under expressed |
| XM_027971422.1 | -3.387058536 | 0.03909164  | Under expressed |
| XM_027972738.1 | -3.375799097 | 0.026978676 | Under expressed |
| XM_012187838.3 | -3.370146967 | 0.108417189 | Under expressed |
| XM_004022060.4 | -3.363054254 | 0.070494162 | Under expressed |
| XM_027970459.1 | -3.362838415 | 0.127399632 | Under expressed |
| XM_004006693.4 | -3.358534933 | 0.0001793   | Under expressed |
| XM_012106636.3 | -3.356901956 | 0.144023509 | Under expressed |
| XM_027978118.1 | -3.353571286 | 0.113352537 | Under expressed |
| XM_004016161.4 | -3.350150835 | 0.100710785 | Under expressed |
| XM_004009623.4 | -3.336406356 | 0.091246676 | Under expressed |
| XM_027963983.1 | -3.332484473 | 0.124595136 | Under expressed |
| XM_027965908.1 | -3.331836409 | 0.084473785 | Under expressed |
| XM_004008639.4 | -3.321957672 | 0.136068274 | Under expressed |
| XR_003590311.1 | -3.315467417 | 0.010688741 | Under expressed |

|                |              |             |                 |
|----------------|--------------|-------------|-----------------|
| XR_003590050.1 | -3.313976172 | 0.112903455 | Under expressed |
| XM_004016381.4 | -3.313442904 | 0.026374953 | Under expressed |
| XM_004021393.4 | -3.309617302 | 0.013316878 | Under expressed |
| XM_027977876.1 | -3.308356202 | 0.103472892 | Under expressed |
| XM_027972514.1 | -3.307450079 | 0.057445438 | Under expressed |
| XR_003589712.1 | -3.301212055 | 0.147632137 | Under expressed |
| XM_012096836.3 | -3.29629812  | 0.10197323  | Under expressed |
| XM_015097833.2 | -3.289021629 | 0.096087619 | Under expressed |
| XR_003591780.1 | -3.287911571 | 0.041613764 | Under expressed |
| XM_004021474.4 | -3.283155733 | 0.077188914 | Under expressed |
| XM_027978376.1 | -3.278703154 | 0.06570014  | Under expressed |
| XM_012181325.3 | -3.275927721 | 0.061431822 | Under expressed |
| XM_027970939.1 | -3.272451783 | 0.111212159 | Under expressed |
| XM_015101283.2 | -3.270020309 | 0.048420843 | Under expressed |
| XM_027976539.1 | -3.259658401 | 0.046658722 | Under expressed |
| XM_012175760.3 | -3.252964112 | 0.027286394 | Under expressed |
| XM_012178891.2 | -3.235582237 | 0.047387753 | Under expressed |
| XM_015105087.2 | -3.233464689 | 0.046520631 | Under expressed |
| XM_012182232.3 | -3.228714498 | 0.101186784 | Under expressed |
| XR_001044627.2 | -3.227871477 | 0.020985767 | Under expressed |
| XM_004004867.4 | -3.226709258 | 0.02643817  | Under expressed |
| XM_015092009.2 | -3.225455035 | 0.034028849 | Under expressed |
| XM_015096788.2 | -3.219791885 | 0.061571085 | Under expressed |
| XR_003589137.1 | -3.216510861 | 0.146251529 | Under expressed |
| XM_027970561.1 | -3.215599122 | 0.074918443 | Under expressed |
| XM_004017011.4 | -3.210387295 | 0.001695058 | Under expressed |
| XM_027963738.1 | -3.210363642 | 0.036953517 | Under expressed |
| XM_027964965.1 | -3.208704179 | 0.001070761 | Under expressed |
| XR_003588708.1 | -3.207760086 | 0.127298693 | Under expressed |
| XM_027974688.1 | -3.204012992 | 0.098258683 | Under expressed |
| XM_027960751.1 | -3.195043812 | 0.10711526  | Under expressed |
| NM_001305890.1 | -3.192221234 | 0.129296313 | Under expressed |
| XM_015098156.2 | -3.189595826 | 0.133159195 | Under expressed |
| XM_004017190.4 | -3.188917988 | 0.028441002 | Under expressed |
| XM_012178176.3 | -3.186330533 | 0.031508716 | Under expressed |
| XM_027974864.1 | -3.184604757 | 4.43E-05    | Under expressed |
| XM_027970980.1 | -3.178417568 | 0.028644199 | Under expressed |
| XM_012190050.3 | -3.176700974 | 0.115757473 | Under expressed |
| XM_012186553.2 | -3.160105448 | 0.122098693 | Under expressed |
| XM_027968443.1 | -3.159862787 | 0.06475597  | Under expressed |
| XM_027975070.1 | -3.159490922 | 0.082852122 | Under expressed |
| XM_012176569.3 | -3.155284503 | 0.085187659 | Under expressed |
| XM_027957398.1 | -3.135249844 | 0.05288789  | Under expressed |
| XM_027979335.1 | -3.133554981 | 0.06263427  | Under expressed |

|                |              |             |                 |
|----------------|--------------|-------------|-----------------|
| XM_015094472.2 | -3.133298621 | 0.043427162 | Under expressed |
| XM_015096185.2 | -3.126966356 | 0.080099051 | Under expressed |
| XR_003586839.1 | -3.124327114 | 0.009009317 | Under expressed |
| XM_012106269.3 | -3.116628425 | 0.10561358  | Under expressed |
| XM_027978984.1 | -3.116258488 | 0.000144801 | Under expressed |
| XR_003589957.1 | -3.102322805 | 0.065169794 | Under expressed |
| XM_027976375.1 | -3.101619357 | 0.00102176  | Under expressed |
| XM_012096967.3 | -3.092725286 | 0.140691344 | Under expressed |
| XR_003589811.1 | -3.091558701 | 0.017406573 | Under expressed |
| XM_004010647.4 | -3.090520542 | 0.018422269 | Under expressed |
| XM_004007932.4 | -3.078511389 | 0.143253784 | Under expressed |
| XM_004016457.4 | -3.077677606 | 0.095995136 | Under expressed |
| XM_004017080.4 | -3.06737564  | 0.122511419 | Under expressed |
| XM_012174584.3 | -3.066988961 | 9.92E-09    | Under expressed |
| XM_004004742.4 | -3.066652357 | 0.007248281 | Under expressed |
| XM_027973686.1 | -3.066558519 | 0.015619392 | Under expressed |
| XR_003588688.1 | -3.066330162 | 0.108105478 | Under expressed |
| XM_015104474.2 | -3.065614029 | 0.117572887 | Under expressed |
| XR_003588233.1 | -3.063008958 | 0.093173579 | Under expressed |
| XM_012102454.3 | -3.049856239 | 0.080210851 | Under expressed |
| XM_015097696.2 | -3.049809109 | 0.127289533 | Under expressed |
| XM_027961562.1 | -3.049159929 | 0.032858196 | Under expressed |
| XM_015101039.2 | -3.041513004 | 0.01556651  | Under expressed |
| XM_027959799.1 | -3.041289864 | 0.113628781 | Under expressed |
| XR_003588720.1 | -3.039276922 | 0.089516665 | Under expressed |
| XM_012172342.2 | -3.037180628 | 0.006051791 | Under expressed |
| XM_027960509.1 | -3.030955543 | 0.047825491 | Under expressed |
| XM_027976000.1 | -3.029543733 | 0.105083273 | Under expressed |
| XM_027965712.1 | -3.027155635 | 0.149734613 | Under expressed |
| XM_015102411.2 | -3.02254405  | 0.125787596 | Under expressed |
| XM_015095217.2 | -3.022329286 | 0.006047766 | Under expressed |
| XM_004017952.4 | -3.021577276 | 2.77E-05    | Under expressed |
| XM_004006842.4 | -3.009760407 | 0.065004996 | Under expressed |
| XM_012096467.2 | -3.001483372 | 0.01713513  | Under expressed |
| XM_027976383.1 | -2.995486192 | 0.125527597 | Under expressed |
| XR_003587623.1 | -2.991121917 | 0.133956634 | Under expressed |
| XM_015101375.2 | -2.989669455 | 0.020033532 | Under expressed |
| XM_004019533.3 | -2.983752628 | 0.052049823 | Under expressed |
| XM_027965055.1 | -2.982547251 | 0.122687386 | Under expressed |
| XM_015097698.2 | -2.979825994 | 0.000643223 | Under expressed |
| XR_001039592.3 | -2.979025268 | 0.043089562 | Under expressed |
| XM_027977851.1 | -2.978444433 | 0.144023509 | Under expressed |
| XM_004005133.4 | -2.972625541 | 0.052914836 | Under expressed |
| XM_012142240.2 | -2.969465451 | 0.080938909 | Under expressed |



|                |              |             |                 |
|----------------|--------------|-------------|-----------------|
| XM_004009079.4 | -2.963001589 | 0.044142627 | Under expressed |
| XM_012187117.3 | -2.962446092 | 0.115757473 | Under expressed |
| XM_015105144.2 | -2.961755408 | 0.053799132 | Under expressed |
| XM_015095723.2 | -2.958063027 | 0.018422269 | Under expressed |
| XM_012178337.3 | -2.956617528 | 0.000936587 | Under expressed |
| XM_027956589.1 | -2.950269944 | 0.146616147 | Under expressed |
| XM_027960945.1 | -2.945580376 | 0.128740583 | Under expressed |
| XM_012181722.3 | -2.941995163 | 0.069503187 | Under expressed |
| XM_015099403.2 | -2.941826856 | 0.001560815 | Under expressed |
| XM_027958177.1 | -2.940894476 | 0.140223705 | Under expressed |
| XM_027971035.1 | -2.938683756 | 0.108201965 | Under expressed |
| XM_027975887.1 | -2.935500584 | 0.095711882 | Under expressed |
| XM_004021402.4 | -2.933965911 | 0.066419921 | Under expressed |
| XM_004003008.3 | -2.924147603 | 0.091784069 | Under expressed |
| XM_012106519.3 | -2.920269163 | 0.006778374 | Under expressed |
| XM_015104557.2 | -2.914289984 | 0.026507839 | Under expressed |
| XM_015094353.2 | -2.910907858 | 0.001357238 | Under expressed |
| XM_027961443.1 | -2.909639663 | 0.037978177 | Under expressed |
| XM_027971471.1 | -2.906331005 | 0.09363129  | Under expressed |
| XM_027964724.1 | -2.904974909 | 0.019535061 | Under expressed |
| XM_012094667.3 | -2.899284842 | 0.102575101 | Under expressed |
| XM_004010194.4 | -2.897276643 | 1.23E-05    | Under expressed |
| XM_012180994.3 | -2.897152344 | 0.08540445  | Under expressed |
| XM_004005978.3 | -2.893315462 | 3.05E-05    | Under expressed |
| XM_015094718.2 | -2.893031525 | 0.048934257 | Under expressed |
| XM_027967658.1 | -2.890724954 | 0.00115211  | Under expressed |
| XM_004007785.4 | -2.884613216 | 0.099762831 | Under expressed |
| XM_012183909.2 | -2.882168261 | 0.081729291 | Under expressed |
| XM_015101322.2 | -2.872292264 | 0.003624264 | Under expressed |
| XM_012150644.2 | -2.870306127 | 0.025020946 | Under expressed |
| XM_012102001.3 | -2.870115715 | 0.143047857 | Under expressed |
| XM_004011272.4 | -2.868214287 | 0.102344539 | Under expressed |
| XM_027963815.1 | -2.866045454 | 0.076791544 | Under expressed |
| XM_004015127.4 | -2.861127358 | 0.008296233 | Under expressed |
| XM_027966406.1 | -2.854631581 | 0.128839736 | Under expressed |
| XM_027968532.1 | -2.853230158 | 0.11490007  | Under expressed |
| XM_012174434.3 | -2.85242705  | 0.007646818 | Under expressed |
| XM_015098220.2 | -2.849886196 | 0.090169349 | Under expressed |
| XM_027971225.1 | -2.848433548 | 0.024749164 | Under expressed |
| XM_015099745.2 | -2.844699679 | 0.090061595 | Under expressed |
| XR_003588148.1 | -2.842273265 | 0.081834057 | Under expressed |
| XM_004017332.4 | -2.842272109 | 0.057223023 | Under expressed |
| XM_027966720.1 | -2.840952152 | 0.120995794 | Under expressed |
| XM_015091903.2 | -2.831884128 | 1.33E-06    | Under expressed |

|                |              |             |                 |
|----------------|--------------|-------------|-----------------|
| XM_012099831.3 | -2.831172082 | 0.140048768 | Under expressed |
| XM_027965014.1 | -2.827638299 | 0.008234738 | Under expressed |
| XM_027958615.1 | -2.82199508  | 0.017875212 | Under expressed |
| XM_004010486.4 | -2.817899534 | 0.092427625 | Under expressed |
| XM_004017500.3 | -2.81061786  | 0.006898071 | Under expressed |
| XM_027961395.1 | -2.80423492  | 0.111401573 | Under expressed |
| XM_027964251.1 | -2.804180235 | 0.074690408 | Under expressed |
| XM_012098166.3 | -2.795733066 | 0.03881947  | Under expressed |
| XM_012104365.3 | -2.791472939 | 0.0143192   | Under expressed |
| XM_027965856.1 | -2.791296368 | 0.124879075 | Under expressed |
| NM_001162557.1 | -2.781540794 | 0.000979204 | Under expressed |
| XM_027963476.1 | -2.781439439 | 0.017344171 | Under expressed |
| XM_027968481.1 | -2.780319183 | 0.033731472 | Under expressed |
| XM_027960212.1 | -2.780063428 | 0.055890225 | Under expressed |
| XM_027958873.1 | -2.775475945 | 0.067688084 | Under expressed |
| XM_004004787.4 | -2.766563457 | 0.111498645 | Under expressed |
| XM_027956256.1 | -2.764837428 | 0.020335664 | Under expressed |
| XR_003589154.1 | -2.752273474 | 0.141339378 | Under expressed |
| XM_004006885.4 | -2.751033618 | 0.110345465 | Under expressed |
| XM_012179769.2 | -2.750046327 | 0.117761176 | Under expressed |
| XM_004012185.3 | -2.749889997 | 0.053979527 | Under expressed |
| XR_003585800.1 | -2.749097774 | 3.28E-05    | Under expressed |
| XM_015092359.2 | -2.748788597 | 0.043063167 | Under expressed |
| NM_001009404.1 | -2.748148411 | 0.087444049 | Under expressed |
| XR_003591283.1 | -2.733209695 | 0.024435478 | Under expressed |
| XM_004016356.3 | -2.729675019 | 0.007398033 | Under expressed |
| XM_015097512.2 | -2.729385209 | 0.071622917 | Under expressed |
| XM_015102549.2 | -2.725579314 | 0.00064948  | Under expressed |
| XM_015099338.2 | -2.724899336 | 0.115180028 | Under expressed |
| XM_027971277.1 | -2.721555626 | 4.45E-05    | Under expressed |
| XM_027960408.1 | -2.718265588 | 0.009470702 | Under expressed |
| XM_027980257.1 | -2.717550937 | 0.134485445 | Under expressed |
| XM_004011770.4 | -2.716699728 | 0.017793199 | Under expressed |
| XM_004017895.4 | -2.713325191 | 0.002442182 | Under expressed |
| XM_004022047.4 | -2.704260925 | 0.00030712  | Under expressed |
| XM_027975157.1 | -2.703860655 | 0.075077706 | Under expressed |
| XM_027962179.1 | -2.702220831 | 0.117761176 | Under expressed |
| XM_012178589.3 | -2.702121081 | 0.016180215 | Under expressed |
| XM_027971773.1 | -2.699717009 | 0.116757225 | Under expressed |
| XM_027964486.1 | -2.698333957 | 0.111498645 | Under expressed |
| XM_012189779.3 | -2.698275958 | 0.001507388 | Under expressed |
| XM_027976103.1 | -2.697591485 | 0.120958033 | Under expressed |
| XM_027980217.1 | -2.696653225 | 0.020714526 | Under expressed |
| XM_015092274.2 | -2.696134225 | 0.003330493 | Under expressed |

|                |              |             |                 |
|----------------|--------------|-------------|-----------------|
| XM_027964526.1 | -2.695235777 | 0.137957869 | Under expressed |
| XM_027960540.1 | -2.690780127 | 0.001160346 | Under expressed |
| XM_027962857.1 | -2.690198409 | 0.000710522 | Under expressed |
| XM_027970562.1 | -2.688123639 | 1.51E-06    | Under expressed |
| XM_027975308.1 | -2.685237744 | 0.146590833 | Under expressed |
| XM_027958780.1 | -2.684022597 | 0.132439213 | Under expressed |
| XM_015096606.2 | -2.679445696 | 0.109608148 | Under expressed |
| XM_012184389.3 | -2.678057191 | 0.031508716 | Under expressed |
| XM_027964163.1 | -2.672443334 | 0.114276131 | Under expressed |
| XM_027977136.1 | -2.661503097 | 0.014161487 | Under expressed |
| XR_003588410.1 | -2.660617332 | 0.067325675 | Under expressed |
| XM_015101295.2 | -2.658870798 | 0.000124912 | Under expressed |
| XM_004011234.4 | -2.652565303 | 0.000582665 | Under expressed |
| XM_027962502.1 | -2.651771148 | 0.134129884 | Under expressed |
| XM_027958622.1 | -2.649031051 | 0.114734629 | Under expressed |
| XR_003588119.1 | -2.64795633  | 0.018634073 | Under expressed |
| XM_004004178.4 | -2.644690047 | 0.00078933  | Under expressed |
| XM_027965546.1 | -2.642309598 | 0.080817572 | Under expressed |
| XM_004007775.4 | -2.637821658 | 0.098121422 | Under expressed |
| XM_015096352.2 | -2.633943431 | 0.121570771 | Under expressed |
| XM_004022206.4 | -2.633101399 | 0.043196012 | Under expressed |
| XM_027957154.1 | -2.630850027 | 0.10561358  | Under expressed |
| XM_027976373.1 | -2.628656204 | 0.04916893  | Under expressed |
| XM_004011406.4 | -2.62860521  | 0.008900524 | Under expressed |
| XM_027975878.1 | -2.625881995 | 0.129718133 | Under expressed |
| XM_027962807.1 | -2.625476802 | 0.123643194 | Under expressed |
| XM_027964974.1 | -2.624922092 | 0.11785419  | Under expressed |
| XM_015092231.2 | -2.623095354 | 0.051430511 | Under expressed |
| XM_004016163.3 | -2.620118737 | 0.004889329 | Under expressed |
| XM_004011373.3 | -2.61854611  | 0.049857534 | Under expressed |
| XM_027957576.1 | -2.618335913 | 3.55E-06    | Under expressed |
| XM_012102009.3 | -2.615504856 | 0.052342651 | Under expressed |
| XM_027962054.1 | -2.611001956 | 0.110715545 | Under expressed |
| XM_027976831.1 | -2.605729691 | 0.020340668 | Under expressed |
| XM_012189153.3 | -2.603492493 | 0.087881703 | Under expressed |
| XM_012178660.3 | -2.598026485 | 0.03703447  | Under expressed |
| XM_004011704.4 | -2.593630166 | 0.137339498 | Under expressed |
| XM_004003222.4 | -2.591321484 | 3.17E-14    | Under expressed |
| XM_027975644.1 | -2.591089763 | 0.102443706 | Under expressed |
| XM_027973105.1 | -2.589378575 | 0.000703953 | Under expressed |
| NM_001093785.2 | -2.583659208 | 0.029824081 | Under expressed |
| XM_027979397.1 | -2.581538124 | 0.051900231 | Under expressed |
| XM_012176896.3 | -2.58127935  | 0.020781231 | Under expressed |
| NM_001287473.1 | -2.578217586 | 0.017734551 | Under expressed |

|                |              |             |                 |
|----------------|--------------|-------------|-----------------|
| XM_004010629.4 | -2.57791457  | 0.001259681 | Under expressed |
| XM_027970753.1 | -2.577435191 | 0.023939488 | Under expressed |
| XM_027979147.1 | -2.577370867 | 0.124147993 | Under expressed |
| XM_027964768.1 | -2.576900176 | 0.084350196 | Under expressed |
| NM_001166179.1 | -2.576252051 | 0.117031255 | Under expressed |
| XM_012190496.3 | -2.575766841 | 0.000110181 | Under expressed |
| XM_027965056.1 | -2.57332503  | 0.109677011 | Under expressed |
| XM_027977661.1 | -2.571140059 | 0.014994054 | Under expressed |
| XM_027965128.1 | -2.569759366 | 0.043256975 | Under expressed |
| XM_027976892.1 | -2.568835793 | 0.000782958 | Under expressed |
| NM_001009293.1 | -2.565541926 | 0.049760155 | Under expressed |
| XM_027964840.1 | -2.563483942 | 0.002404799 | Under expressed |
| NM_001246209.1 | -2.559845038 | 0.129296313 | Under expressed |
| XM_027977103.1 | -2.557261932 | 4.80E-05    | Under expressed |
| XM_004005642.4 | -2.551554007 | 0.149437976 | Under expressed |
| XM_012096909.2 | -2.551344676 | 0.08353401  | Under expressed |
| XM_027959102.1 | -2.550782828 | 0.115316184 | Under expressed |
| XM_027964937.1 | -2.547901367 | 0.07653042  | Under expressed |
| XM_012124958.3 | -2.54756548  | 0.056472868 | Under expressed |
| XM_015096203.2 | -2.54563585  | 0.029615382 | Under expressed |
| XR_003588162.1 | -2.543968284 | 0.141928052 | Under expressed |
| XM_004016068.4 | -2.54164378  | 0.005145597 | Under expressed |
| XM_012103494.3 | -2.540907682 | 0.064610026 | Under expressed |
| XM_004009930.3 | -2.537866117 | 0.000492242 | Under expressed |
| XM_027960720.1 | -2.535439142 | 0.001165931 | Under expressed |
| XM_012178991.3 | -2.534524484 | 0.029903906 | Under expressed |
| XM_027973573.1 | -2.533904354 | 0.000643223 | Under expressed |
| XM_004013634.4 | -2.533561962 | 0.005613327 | Under expressed |
| XM_027959347.1 | -2.532386572 | 0.018614384 | Under expressed |
| XM_004015503.3 | -2.532229707 | 0.115627782 | Under expressed |
| XM_027979709.1 | -2.530862531 | 0.135150578 | Under expressed |
| XM_004011372.4 | -2.53085244  | 0.046968184 | Under expressed |
| XM_004020238.4 | -2.523287902 | 0.012394268 | Under expressed |
| XM_027978698.1 | -2.522024073 | 0.084596675 | Under expressed |
| XR_003590978.1 | -2.519186034 | 0.050091499 | Under expressed |
| XM_015099445.2 | -2.518705595 | 0.088637851 | Under expressed |
| XM_012100566.3 | -2.517785349 | 0.136751216 | Under expressed |
| XR_001042902.2 | -2.517630772 | 4.19E-08    | Under expressed |
| XM_027959263.1 | -2.51658205  | 0.028011135 | Under expressed |
| XM_004021485.4 | -2.516540719 | 0.004889329 | Under expressed |
| XM_012184136.2 | -2.513320107 | 0.001485509 | Under expressed |
| XM_004008623.3 | -2.509477628 | 0.141062276 | Under expressed |
| XM_004016542.3 | -2.505109905 | 0.048918956 | Under expressed |
| XM_012175197.2 | -2.502373304 | 0.006047766 | Under expressed |

|                |              |             |                 |
|----------------|--------------|-------------|-----------------|
| XM_015093381.2 | -2.502073819 | 0.028191205 | Under expressed |
| XM_027973013.1 | -2.495152241 | 0.050693452 | Under expressed |
| XM_027964900.1 | -2.494066858 | 0.137768563 | Under expressed |
| XM_012133312.3 | -2.490122276 | 0.075594242 | Under expressed |
| XM_027978926.1 | -2.48837903  | 0.005715957 | Under expressed |
| XM_027971117.1 | -2.487832742 | 0.038337281 | Under expressed |
| XR_003587350.1 | -2.48781016  | 0.081403978 | Under expressed |
| XM_027965401.1 | -2.486371588 | 0.078578143 | Under expressed |
| XM_027979939.1 | -2.48497606  | 0.140400335 | Under expressed |
| XM_004022208.4 | -2.481191298 | 0.024808047 | Under expressed |
| XM_004006895.3 | -2.478677056 | 0.064928596 | Under expressed |
| XM_015104100.2 | -2.475064107 | 0.036268187 | Under expressed |
| XM_012101125.3 | -2.47415569  | 0.038722969 | Under expressed |
| XM_027966866.1 | -2.473769151 | 0.06649804  | Under expressed |
| XM_015097743.2 | -2.472997011 | 0.005503951 | Under expressed |
| XM_004010606.4 | -2.465773877 | 0.010320022 | Under expressed |
| XM_027964209.1 | -2.465360775 | 0.012061769 | Under expressed |
| XM_027967244.1 | -2.463793407 | 0.087415582 | Under expressed |
| XM_004018341.4 | -2.463258808 | 0.000381695 | Under expressed |
| XM_027960636.1 | -2.460015215 | 0.066638332 | Under expressed |
| XR_003586536.1 | -2.459764397 | 0.009134949 | Under expressed |
| NM_001127283.1 | -2.45916185  | 0.023347857 | Under expressed |
| NM_001306117.1 | -2.45646364  | 0.073745649 | Under expressed |
| XM_015094763.2 | -2.452859578 | 0.059532632 | Under expressed |
| XR_003586846.1 | -2.450216351 | 0.117603829 | Under expressed |
| XM_004011849.3 | -2.450191269 | 0.000956676 | Under expressed |
| XM_015095181.2 | -2.443105471 | 0.092045171 | Under expressed |
| XM_027971763.1 | -2.431926928 | 0.139877251 | Under expressed |
| XR_001435971.2 | -2.431907498 | 0.023634219 | Under expressed |
| XM_004022011.3 | -2.430712867 | 0.003488937 | Under expressed |
| XM_027960494.1 | -2.428901337 | 0.004195614 | Under expressed |
| XM_012130478.3 | -2.427518124 | 0.141928052 | Under expressed |
| XM_004001961.4 | -2.426864331 | 0.024990657 | Under expressed |
| XR_003590462.1 | -2.424942916 | 0.04154997  | Under expressed |
| XM_027960253.1 | -2.423112156 | 0.038352983 | Under expressed |
| XM_004022470.3 | -2.421557382 | 0.117273093 | Under expressed |
| XM_027978697.1 | -2.419811757 | 0.001174062 | Under expressed |
| XM_012107035.3 | -2.41601862  | 0.004256588 | Under expressed |
| XM_027971803.1 | -2.414924264 | 0.004984436 | Under expressed |
| XM_012181318.2 | -2.411667044 | 0.096594072 | Under expressed |
| XM_027959293.1 | -2.4051698   | 0.114061303 | Under expressed |
| XR_003586255.1 | -2.404059904 | 0.059741331 | Under expressed |
| XM_015093054.2 | -2.398580493 | 0.006077946 | Under expressed |
| XM_015097210.2 | -2.398132616 | 0.031871959 | Under expressed |

|                |              |             |                 |
|----------------|--------------|-------------|-----------------|
| XM_027963003.1 | -2.39064164  | 0.010012584 | Under expressed |
| XM_004012195.4 | -2.389045758 | 0.000174424 | Under expressed |
| XM_027964780.1 | -2.385378693 | 0.054527649 | Under expressed |
| XM_012102986.3 | -2.385232758 | 0.117761176 | Under expressed |
| XM_012178936.3 | -2.385017532 | 0.049857534 | Under expressed |
| XM_027976590.1 | -2.383273933 | 0.11984936  | Under expressed |
| XM_027957447.1 | -2.380196168 | 0.070174815 | Under expressed |
| NM_001281825.1 | -2.377271739 | 0.01120223  | Under expressed |
| XM_004007842.4 | -2.376090069 | 0.045213358 | Under expressed |
| XM_004022371.4 | -2.374061821 | 0.140366915 | Under expressed |
| XM_027971634.1 | -2.37403585  | 0.104239894 | Under expressed |
| XM_027972436.1 | -2.372591532 | 0.018120173 | Under expressed |
| XM_012097061.2 | -2.371985907 | 0.05098375  | Under expressed |
| XM_027976185.1 | -2.37114257  | 0.147752049 | Under expressed |
| XM_015095934.2 | -2.370361549 | 0.023409628 | Under expressed |
| XR_003590728.1 | -2.368259563 | 0.003484533 | Under expressed |
| XM_004020480.4 | -2.368222412 | 0.028158243 | Under expressed |
| NM_001195318.1 | -2.364195541 | 0.000648606 | Under expressed |
| XM_012096363.3 | -2.362614897 | 0.03158679  | Under expressed |
| XM_012174395.3 | -2.362287933 | 2.16E-05    | Under expressed |
| XM_004009673.4 | -2.361020977 | 0.00186862  | Under expressed |
| XM_027975389.1 | -2.358617949 | 0.05514832  | Under expressed |
| XM_004014191.4 | -2.357446215 | 0.002012264 | Under expressed |
| XM_004017018.4 | -2.356606461 | 0.012505497 | Under expressed |
| XM_015102838.2 | -2.354925111 | 0.020982754 | Under expressed |
| XM_004006498.4 | -2.351273062 | 0.010351125 | Under expressed |
| XM_012174145.3 | -2.351070441 | 0.107697796 | Under expressed |
| NM_001162551.1 | -2.347615242 | 0.099010274 | Under expressed |
| NM_001143892.1 | -2.347539835 | 0.013815031 | Under expressed |
| NM_001280672.1 | -2.346654725 | 0.04070628  | Under expressed |
| XM_027972954.1 | -2.345749554 | 0.056759396 | Under expressed |
| XM_015096973.2 | -2.339706237 | 0.133584439 | Under expressed |
| XM_004002337.4 | -2.339304511 | 0.060794449 | Under expressed |
| XM_027972216.1 | -2.3357603   | 0.063445055 | Under expressed |
| XM_004005927.4 | -2.334642184 | 0.005107369 | Under expressed |
| XR_003588734.1 | -2.333417854 | 0.017914835 | Under expressed |
| XM_027980051.1 | -2.33220138  | 0.011935602 | Under expressed |
| XM_004020189.4 | -2.330880327 | 0.135150578 | Under expressed |
| XM_027960308.1 | -2.327891639 | 0.148620498 | Under expressed |
| XM_027970531.1 | -2.32775094  | 0.006415198 | Under expressed |
| XM_027973705.1 | -2.323845511 | 0.080147962 | Under expressed |
| XM_027965132.1 | -2.321973489 | 0.055677671 | Under expressed |
| XR_003589742.1 | -2.319832763 | 0.115360518 | Under expressed |
| XM_012105052.3 | -2.312705224 | 0.005011484 | Under expressed |

|                |              |             |                 |
|----------------|--------------|-------------|-----------------|
| XM_004002179.4 | -2.30939893  | 0.007216024 | Under expressed |
| XM_027974854.1 | -2.307409181 | 0.126095431 | Under expressed |
| XR_003586495.1 | -2.301711011 | 0.044867291 | Under expressed |
| XM_012137392.2 | -2.300921124 | 0.002442899 | Under expressed |
| XM_027960936.1 | -2.299914241 | 0.00329434  | Under expressed |
| XM_027969891.1 | -2.298540717 | 0.084035725 | Under expressed |
| XM_027962755.1 | -2.29740851  | 0.137337678 | Under expressed |
| XM_027959724.1 | -2.295100649 | 0.068403482 | Under expressed |
| XM_027966193.1 | -2.288014943 | 0.000710836 | Under expressed |
| XM_004002710.3 | -2.28714055  | 0.006150103 | Under expressed |
| XM_004003336.4 | -2.286322203 | 0.013972216 | Under expressed |
| XM_027957526.1 | -2.279087073 | 0.114734629 | Under expressed |
| NM_001009803.1 | -2.277133115 | 0.129354138 | Under expressed |
| XM_027966825.1 | -2.276782202 | 0.002301445 | Under expressed |
| XM_012185866.3 | -2.275846753 | 0.018430334 | Under expressed |
| XM_027966972.1 | -2.274507074 | 0.037413702 | Under expressed |
| XM_012106260.3 | -2.274328442 | 0.042329928 | Under expressed |
| XM_012184450.2 | -2.27286809  | 0.094967488 | Under expressed |
| XM_027970941.1 | -2.269567718 | 0.011309071 | Under expressed |
| XM_015092360.2 | -2.269414031 | 0.069792492 | Under expressed |
| XM_004015202.4 | -2.263944431 | 0.011966257 | Under expressed |
| XM_012095475.3 | -2.263941228 | 9.92E-09    | Under expressed |
| XM_004002746.4 | -2.262489272 | 0.007253212 | Under expressed |
| XR_001044485.3 | -2.261731954 | 0.055980039 | Under expressed |
| XM_027964909.1 | -2.26170111  | 0.125073826 | Under expressed |
| XM_004008031.4 | -2.258222979 | 0.002033644 | Under expressed |
| XM_015094597.2 | -2.257421744 | 0.031471739 | Under expressed |
| XM_015096188.2 | -2.24944231  | 0.062892863 | Under expressed |
| XM_004018246.4 | -2.249037331 | 0.071936565 | Under expressed |
| XM_027979572.1 | -2.248474978 | 0.007402277 | Under expressed |
| XM_004018862.4 | -2.247213598 | 0.012995781 | Under expressed |
| XM_027975557.1 | -2.247002818 | 0.041056259 | Under expressed |
| NM_001162546.1 | -2.246198509 | 0.043394599 | Under expressed |
| XM_004008807.4 | -2.244944193 | 0.027866223 | Under expressed |
| XM_027971375.1 | -2.244555943 | 0.013130177 | Under expressed |
| XM_004005657.4 | -2.241439329 | 0.001937031 | Under expressed |
| XM_015092367.2 | -2.241027412 | 0.001138348 | Under expressed |
| XM_027973702.1 | -2.240874177 | 0.14598292  | Under expressed |
| XM_027973562.1 | -2.239639619 | 0.006894064 | Under expressed |
| XM_027973524.1 | -2.238505922 | 0.027657722 | Under expressed |
| XR_003590249.1 | -2.237902755 | 0.005239709 | Under expressed |
| XM_027978933.1 | -2.235129895 | 0.143047857 | Under expressed |
| XM_027960554.1 | -2.232024773 | 0.060101614 | Under expressed |
| XM_015104559.2 | -2.230529725 | 0.046858452 | Under expressed |

|                |              |             |                 |
|----------------|--------------|-------------|-----------------|
| XM_027966723.1 | -2.229110935 | 0.005533585 | Under expressed |
| XM_004004031.4 | -2.228227515 | 0.085845743 | Under expressed |
| XM_015092049.2 | -2.227130706 | 0.02458214  | Under expressed |
| XM_004002484.4 | -2.226087455 | 0.012216998 | Under expressed |
| XM_004021939.4 | -2.221936074 | 0.008270735 | Under expressed |
| XM_027972310.1 | -2.220241348 | 0.067325675 | Under expressed |
| XM_012181770.3 | -2.212182028 | 0.001216114 | Under expressed |
| XM_015096775.2 | -2.210833199 | 0.000194455 | Under expressed |
| XM_027970867.1 | -2.210346365 | 0.041863402 | Under expressed |
| XM_012184971.3 | -2.208427253 | 0.044466842 | Under expressed |
| XM_004017922.3 | -2.207358676 | 0.000153308 | Under expressed |
| XR_003585923.1 | -2.20210179  | 0.062180562 | Under expressed |
| XR_003591490.1 | -2.198576009 | 0.005364164 | Under expressed |
| XM_027974335.1 | -2.198041703 | 0.028801284 | Under expressed |
| XM_027975992.1 | -2.197867613 | 0.004348272 | Under expressed |
| XM_027979334.1 | -2.19487977  | 0.007310305 | Under expressed |
| XM_027979607.1 | -2.194859427 | 0.08218688  | Under expressed |
| XM_027967229.1 | -2.194802081 | 0.08501799  | Under expressed |
| XM_027962302.1 | -2.189688338 | 0.056582848 | Under expressed |
| XM_004014303.4 | -2.188537991 | 0.000153257 | Under expressed |
| XM_015091599.2 | -2.187341811 | 0.035136979 | Under expressed |
| XM_004017830.3 | -2.184878215 | 0.014194453 | Under expressed |
| XM_004022471.4 | -2.183125172 | 5.13E-05    | Under expressed |
| XM_012178334.3 | -2.182827129 | 0.038357434 | Under expressed |
| NM_001163598.1 | -2.178208466 | 0.008701424 | Under expressed |
| XR_003588722.1 | -2.176711409 | 0.001554644 | Under expressed |
| XM_004009926.4 | -2.176261527 | 2.50E-06    | Under expressed |
| XM_027963731.1 | -2.176166818 | 0.038816282 | Under expressed |
| XM_004020009.4 | -2.175797748 | 0.029498492 | Under expressed |
| XM_027964017.1 | -2.174722167 | 0.084608164 | Under expressed |
| XM_004016167.3 | -2.174250034 | 0.006836244 | Under expressed |
| XM_027968500.1 | -2.173879376 | 0.007131137 | Under expressed |
| XM_027977324.1 | -2.171762994 | 0.127289261 | Under expressed |
| XM_027973275.1 | -2.170461862 | 0.007970897 | Under expressed |
| XR_003588553.1 | -2.168699018 | 7.27E-09    | Under expressed |
| XM_027964730.1 | -2.167934654 | 0.063294169 | Under expressed |
| XM_015097395.2 | -2.167699421 | 0.001183007 | Under expressed |
| XM_004002866.3 | -2.167589531 | 0.133441161 | Under expressed |
| XM_027971984.1 | -2.167475282 | 0.018737395 | Under expressed |
| XR_003588888.1 | -2.163539599 | 0.032699088 | Under expressed |
| XM_027967158.1 | -2.162320662 | 0.073304131 | Under expressed |
| XM_027962854.1 | -2.162277848 | 0.015126033 | Under expressed |
| XM_015092418.2 | -2.160250858 | 0.027941289 | Under expressed |
| XM_027967784.1 | -2.159526746 | 0.051378708 | Under expressed |



|                |              |             |                 |
|----------------|--------------|-------------|-----------------|
| XM_004016872.3 | -2.159032308 | 0.0859512   | Under expressed |
| XM_012097270.3 | -2.156658804 | 0.009807799 | Under expressed |
| XM_004013898.3 | -2.156229215 | 0.04085217  | Under expressed |
| XM_004022220.4 | -2.156137226 | 0.028191205 | Under expressed |
| XR_003586541.1 | -2.154575715 | 0.022091556 | Under expressed |
| XM_015096231.2 | -2.153954464 | 0.012490613 | Under expressed |
| XM_027956292.1 | -2.150993509 | 0.122105756 | Under expressed |
| XM_004015199.4 | -2.150287684 | 0.059634063 | Under expressed |
| XM_004009621.3 | -2.150221801 | 0.084118225 | Under expressed |
| XM_012180719.3 | -2.14774891  | 0.006553512 | Under expressed |
| XM_004014912.4 | -2.145243931 | 6.65E-05    | Under expressed |
| XM_027964707.1 | -2.143767822 | 0.093264292 | Under expressed |
| XM_015092136.2 | -2.140858841 | 0.000276847 | Under expressed |
| XM_015092054.2 | -2.139773271 | 0.023609912 | Under expressed |
| XM_027980137.1 | -2.139201453 | 0.001506081 | Under expressed |
| NM_001126361.1 | -2.138081182 | 0.144611121 | Under expressed |
| XM_027962669.1 | -2.137523474 | 0.025010063 | Under expressed |
| XM_027968476.1 | -2.136021735 | 0.011309071 | Under expressed |
| XM_015098436.2 | -2.130947462 | 0.060691503 | Under expressed |
| XM_027971483.1 | -2.130641023 | 0.024405786 | Under expressed |
| XM_012135959.3 | -2.130267372 | 0.057673062 | Under expressed |
| XM_027956992.1 | -2.130002474 | 0.082649792 | Under expressed |
| XM_004009709.4 | -2.127578043 | 0.014393813 | Under expressed |
| XM_012184327.3 | -2.125835826 | 0.027563549 | Under expressed |
| XM_012185228.3 | -2.125697275 | 0.021320172 | Under expressed |
| XM_027962303.1 | -2.124851674 | 0.00090434  | Under expressed |
| XR_003591761.1 | -2.11857493  | 0.137815679 | Under expressed |
| XM_027956323.1 | -2.117911263 | 0.021755749 | Under expressed |
| XM_027964951.1 | -2.114882579 | 0.101002209 | Under expressed |
| XM_027975590.1 | -2.111777062 | 0.06435357  | Under expressed |
| XM_012175401.3 | -2.111138797 | 7.97E-06    | Under expressed |
| XM_004014973.3 | -2.11043558  | 0.10963996  | Under expressed |
| XM_027980075.1 | -2.109439342 | 0.120210216 | Under expressed |
| XR_003588225.1 | -2.106508872 | 0.115228927 | Under expressed |
| XM_027978673.1 | -2.105427196 | 2.77E-05    | Under expressed |
| XM_004020249.3 | -2.10423698  | 0.099883603 | Under expressed |
| NM_001009254.1 | -2.104232969 | 0.090169349 | Under expressed |
| XM_027969196.1 | -2.103628535 | 0.088637851 | Under expressed |
| XR_003590932.1 | -2.103335801 | 0.064733848 | Under expressed |
| XM_012107255.3 | -2.102224728 | 0.00749432  | Under expressed |
| XM_027971453.1 | -2.101771081 | 0.114292557 | Under expressed |
| XM_027978705.1 | -2.101290318 | 0.09134946  | Under expressed |
| XM_027971441.1 | -2.100477223 | 0.001136631 | Under expressed |
| NM_001161886.1 | -2.099499943 | 0.08218688  | Under expressed |

|                |              |             |                 |
|----------------|--------------|-------------|-----------------|
| XM_004008805.4 | -2.09653593  | 0.090253103 | Under expressed |
| XM_027973243.1 | -2.094851961 | 0.005255699 | Under expressed |
| XM_004004405.4 | -2.094654552 | 0.002069099 | Under expressed |
| XM_027957240.1 | -2.092909791 | 0.012525433 | Under expressed |
| NM_001246211.1 | -2.088787092 | 0.058471209 | Under expressed |
| XM_027965926.1 | -2.087029862 | 0.057072535 | Under expressed |
| XM_004010590.4 | -2.085775529 | 0.004627867 | Under expressed |
| XM_015093280.2 | -2.0854582   | 0.000350677 | Under expressed |
| XM_004005110.4 | -2.085274729 | 0.143047857 | Under expressed |
| XM_027972489.1 | -2.085119565 | 0.013794946 | Under expressed |
| XM_004021055.4 | -2.084823577 | 0.068067799 | Under expressed |
| XM_012106120.3 | -2.083797949 | 0.084546366 | Under expressed |
| XM_027970521.1 | -2.082214808 | 0.000280416 | Under expressed |
| XM_027975137.1 | -2.081748292 | 0.144632422 | Under expressed |
| XM_004017823.4 | -2.081514653 | 0.00186862  | Under expressed |
| XM_004010658.3 | -2.081459398 | 0.050091499 | Under expressed |
| XM_012189202.3 | -2.0793193   | 0.053799132 | Under expressed |
| XM_027967993.1 | -2.078913142 | 0.084608164 | Under expressed |
| XM_012106516.2 | -2.078567414 | 0.034812776 | Under expressed |
| XR_003590878.1 | -2.077932612 | 0.03659084  | Under expressed |
| XM_004013845.4 | -2.076478372 | 0.08686471  | Under expressed |
| XM_004003000.4 | -2.075412921 | 0.027325012 | Under expressed |
| XR_003590690.1 | -2.074137353 | 0.009954469 | Under expressed |
| XR_001434185.2 | -2.074053553 | 0.058173522 | Under expressed |
| XM_027979842.1 | -2.071587874 | 0.054004676 | Under expressed |
| XM_027977757.1 | -2.070430118 | 0.084035725 | Under expressed |
| XM_027959181.1 | -2.068356739 | 0.033667572 | Under expressed |
| XM_004004303.4 | -2.068114022 | 0.05421097  | Under expressed |
| XM_027979676.1 | -2.06807212  | 0.084518502 | Under expressed |
| XM_012105225.3 | -2.06545521  | 0.053033863 | Under expressed |
| XM_015104004.2 | -2.065185848 | 0.006950817 | Under expressed |
| XM_004007771.4 | -2.064810928 | 0.051900231 | Under expressed |
| XM_012176847.2 | -2.061962115 | 0.046227553 | Under expressed |
| XM_027971060.1 | -2.061404175 | 0.000533767 | Under expressed |
| XM_004010508.4 | -2.060105738 | 0.025638898 | Under expressed |
| XM_027971779.1 | -2.053806007 | 0.041635347 | Under expressed |
| XR_003591117.1 | -2.049257043 | 0.046917179 | Under expressed |
| XM_027959053.1 | -2.046302952 | 0.045641359 | Under expressed |
| XM_027970431.1 | -2.045365377 | 0.114276131 | Under expressed |
| XM_012103738.2 | -2.04480283  | 2.85E-05    | Under expressed |
| XM_004022399.4 | -2.043277074 | 0.004295673 | Under expressed |
| XM_015100903.2 | -2.043126942 | 0.069279782 | Under expressed |
| XM_027966551.1 | -2.041157891 | 0.075594242 | Under expressed |
| NM_001142887.1 | -2.040472886 | 0.11898354  | Under expressed |

|                |              |             |                 |
|----------------|--------------|-------------|-----------------|
| XR_003588767.1 | -2.039039233 | 0.057244981 | Under expressed |
| XM_027956615.1 | -2.038906457 | 0.008681624 | Under expressed |
| XR_003591442.1 | -2.038409327 | 0.061010636 | Under expressed |
| XM_012178826.3 | -2.03645071  | 0.000691041 | Under expressed |
| XR_003590278.1 | -2.036312314 | 0.00137551  | Under expressed |
| XR_003589965.1 | -2.034866891 | 0.025112993 | Under expressed |
| XM_004011832.4 | -2.031853658 | 0.057460464 | Under expressed |
| XM_015104390.2 | -2.031026008 | 0.001136631 | Under expressed |
| XM_004004570.4 | -2.030954847 | 2.85E-05    | Under expressed |
| XM_012178515.2 | -2.030797326 | 0.020781231 | Under expressed |
| XM_015102064.2 | -2.030757046 | 0.022914715 | Under expressed |
| XM_004002204.4 | -2.030001405 | 0.003647472 | Under expressed |
| XM_015099353.2 | -2.028908337 | 0.004225515 | Under expressed |
| XM_012099452.2 | -2.02888926  | 0.082227618 | Under expressed |
| XR_003586086.1 | -2.028484459 | 0.024037753 | Under expressed |
| XM_012097548.3 | -2.028168936 | 0.055871747 | Under expressed |
| XM_004021751.3 | -2.027460995 | 0.026396168 | Under expressed |
| XM_004020483.3 | -2.027080552 | 0.031871959 | Under expressed |
| XM_004008531.4 | -2.025741915 | 0.021828034 | Under expressed |
| XM_004020948.4 | -2.02496211  | 0.042807627 | Under expressed |
| XM_027968911.1 | -2.024574925 | 0.020798222 | Under expressed |
| XM_012097525.3 | -2.024405763 | 0.081286604 | Under expressed |
| XR_003589890.1 | -2.017598802 | 0.003978605 | Under expressed |
| XM_012095290.3 | -2.017444899 | 0.005852382 | Under expressed |
| XM_004007845.4 | -2.017114274 | 0.038453148 | Under expressed |
| XM_027967641.1 | -2.01706382  | 0.030579045 | Under expressed |
| XM_015094497.2 | -2.015932076 | 0.001892719 | Under expressed |
| XM_027975823.1 | -2.010675639 | 0.049734581 | Under expressed |
| XR_001435858.2 | -2.010178758 | 0.137278671 | Under expressed |
| XM_027972993.1 | -2.008972923 | 0.021565867 | Under expressed |
| XM_004006692.4 | -2.004798215 | 0.069728327 | Under expressed |
| XM_027972451.1 | -2.004741194 | 0.075594242 | Under expressed |
| XM_004016320.4 | -2.004629151 | 0.105599617 | Under expressed |
| XM_027973858.1 | -2.003914014 | 0.095612043 | Under expressed |
| XM_027976262.1 | -2.003750788 | 0.111168567 | Under expressed |
| XM_015093555.2 | -2.000220867 | 0.004225515 | Under expressed |
| XM_027964788.1 | -2.000153889 | 0.050282539 | Under expressed |
| XM_004011263.4 | -1.998194479 | 0.003701093 | Under expressed |
| XM_015097459.2 | -1.997778345 | 0.016932605 | Under expressed |
| XM_012176385.3 | -1.996878352 | 0.042527124 | Under expressed |
| XM_027958726.1 | -1.9962586   | 0.010789577 | Under expressed |
| XM_004012102.3 | -1.995816454 | 0.070406603 | Under expressed |
| XM_004009919.4 | -1.995262212 | 0.043200834 | Under expressed |
| XM_027970107.1 | -1.994947725 | 0.054004676 | Under expressed |

|                |              |             |                 |
|----------------|--------------|-------------|-----------------|
| XM_027979741.1 | -1.993759447 | 0.116020421 | Under expressed |
| XM_015097744.2 | -1.993640667 | 0.000515334 | Under expressed |
| XM_012184629.3 | -1.991933146 | 0.002546516 | Under expressed |
| XM_004004353.4 | -1.991637946 | 0.016999286 | Under expressed |
| XM_027964049.1 | -1.985413087 | 0.11401293  | Under expressed |
| XM_027963265.1 | -1.982195841 | 0.06263427  | Under expressed |
| XR_001039255.3 | -1.982092238 | 0.028923781 | Under expressed |
| XM_027967884.1 | -1.980892186 | 0.130367032 | Under expressed |
| XM_027968589.1 | -1.977926482 | 0.027908835 | Under expressed |
| XM_015100374.2 | -1.977232256 | 0.04289252  | Under expressed |
| XM_004008850.3 | -1.975772058 | 0.022211972 | Under expressed |
| XM_027979630.1 | -1.974405878 | 0.085754993 | Under expressed |
| XM_004005901.4 | -1.972417549 | 8.63E-05    | Under expressed |
| XM_027967631.1 | -1.969484324 | 0.102270871 | Under expressed |
| NM_001130154.1 | -1.969403587 | 0.080817572 | Under expressed |
| XM_012097712.3 | -1.96882909  | 0.025194359 | Under expressed |
| XM_004007846.4 | -1.966800083 | 0.005988437 | Under expressed |
| XR_003588674.1 | -1.966035865 | 0.007777481 | Under expressed |
| XM_015095306.2 | -1.9640472   | 0.000100237 | Under expressed |
| XM_027962434.1 | -1.960538325 | 0.126330161 | Under expressed |
| XM_004011193.4 | -1.959121117 | 0.008669331 | Under expressed |
| XM_015103722.2 | -1.95787763  | 0.005533585 | Under expressed |
| XR_003586529.1 | -1.95573989  | 0.028669153 | Under expressed |
| XM_027973160.1 | -1.955697094 | 0.036201361 | Under expressed |
| XM_015094292.2 | -1.954187501 | 0.034465591 | Under expressed |
| XM_004002269.4 | -1.952829019 | 0.141928052 | Under expressed |
| XM_027976360.1 | -1.952291149 | 0.084035725 | Under expressed |
| XM_027961089.1 | -1.952217104 | 0.015348257 | Under expressed |
| XM_004002839.4 | -1.951788943 | 0.017559004 | Under expressed |
| XM_012105740.2 | -1.950116684 | 0.031672061 | Under expressed |
| XM_004012421.4 | -1.948488154 | 0.116914815 | Under expressed |
| XM_012183375.2 | -1.947320706 | 8.33E-06    | Under expressed |
| XM_004010489.4 | -1.947021276 | 0.01966536  | Under expressed |
| XM_004017028.4 | -1.945523242 | 0.029296021 | Under expressed |
| XM_027968871.1 | -1.944854331 | 0.058398228 | Under expressed |
| NM_001009394.1 | -1.944503511 | 0.010514345 | Under expressed |
| XM_027956247.1 | -1.943753403 | 0.001099951 | Under expressed |
| XM_027968213.1 | -1.943430562 | 0.008154444 | Under expressed |
| NM_001009742.1 | -1.943014685 | 0.02352861  | Under expressed |
| XM_004002165.4 | -1.941629508 | 0.120346349 | Under expressed |
| XM_004003007.3 | -1.94062315  | 0.077415236 | Under expressed |
| XM_012176761.3 | -1.932522086 | 0.068970619 | Under expressed |
| XM_004016298.4 | -1.931669559 | 0.05098375  | Under expressed |
| XR_003590497.1 | -1.929919318 | 0.091844416 | Under expressed |

|                |              |             |                 |
|----------------|--------------|-------------|-----------------|
| XM_004007817.4 | -1.926948493 | 0.043073883 | Under expressed |
| XM_015100531.2 | -1.926507126 | 0.022689947 | Under expressed |
| XM_012105588.2 | -1.925812133 | 6.84E-07    | Under expressed |
| XM_012097004.2 | -1.925277943 | 0.037190462 | Under expressed |
| XR_003586535.1 | -1.924133392 | 0.013130177 | Under expressed |
| XM_004017070.3 | -1.922705583 | 0.047604785 | Under expressed |
| XM_027971121.1 | -1.922436026 | 0.003791834 | Under expressed |
| NM_001127274.1 | -1.92180693  | 0.026656617 | Under expressed |
| XM_004003873.4 | -1.921002286 | 0.001259681 | Under expressed |
| XM_015093334.2 | -1.920075551 | 0.118156747 | Under expressed |
| XM_027977955.1 | -1.915709862 | 0.028168979 | Under expressed |
| XM_004017712.4 | -1.915310988 | 0.002626774 | Under expressed |
| XM_004012516.4 | -1.914333304 | 0.102275821 | Under expressed |
| XM_015096173.2 | -1.914221709 | 0.046072859 | Under expressed |
| XM_012110914.3 | -1.913295302 | 0.087008378 | Under expressed |
| XM_027979016.1 | -1.912513681 | 0.065042304 | Under expressed |
| XM_004020252.4 | -1.910296936 | 0.075299708 | Under expressed |
| XM_027972945.1 | -1.907769778 | 0.006560197 | Under expressed |
| XM_027970888.1 | -1.906525523 | 0.077231286 | Under expressed |
| XM_027977799.1 | -1.905986266 | 5.88E-14    | Under expressed |
| XM_012188639.3 | -1.90572698  | 0.025890047 | Under expressed |
| XM_004018269.3 | -1.90497814  | 0.071250516 | Under expressed |
| XM_015099670.2 | -1.904322131 | 0.032140067 | Under expressed |
| XM_027966867.1 | -1.904041665 | 0.042704429 | Under expressed |
| XR_003590605.1 | -1.902496781 | 0.146132376 | Under expressed |
| XM_004007807.4 | -1.901104529 | 0.065042304 | Under expressed |
| XM_004004354.4 | -1.897987203 | 0.091187943 | Under expressed |
| XR_003591068.1 | -1.897281892 | 0.03417323  | Under expressed |
| XM_004020155.4 | -1.896756406 | 0.115831515 | Under expressed |
| XM_027978929.1 | -1.896583656 | 0.057575546 | Under expressed |
| XR_003586698.1 | -1.894136793 | 7.84E-06    | Under expressed |
| XM_027972871.1 | -1.893165937 | 0.128605827 | Under expressed |
| XM_004010459.4 | -1.891095533 | 0.064423171 | Under expressed |
| XM_027966243.1 | -1.890074815 | 0.007192831 | Under expressed |
| XM_027962719.1 | -1.889938863 | 0.090582644 | Under expressed |
| XM_027975271.1 | -1.887831867 | 0.076207539 | Under expressed |
| XM_004013651.4 | -1.885535513 | 0.032397353 | Under expressed |
| XM_027973501.1 | -1.885048813 | 0.02136222  | Under expressed |
| XM_004001925.4 | -1.882626596 | 0.14474187  | Under expressed |
| XM_012097320.3 | -1.881399955 | 0.114734629 | Under expressed |
| XM_012187092.3 | -1.880400012 | 0.037180511 | Under expressed |
| NM_001035124.1 | -1.879558405 | 0.148846638 | Under expressed |
| XM_027979524.1 | -1.879518288 | 0.057685909 | Under expressed |
| XM_004004522.3 | -1.879407077 | 0.025086922 | Under expressed |

|                |              |             |                 |
|----------------|--------------|-------------|-----------------|
| XM_012190225.3 | -1.878241788 | 1.33E-06    | Under expressed |
| XM_027959198.1 | -1.878187838 | 0.003057442 | Under expressed |
| XM_015102456.2 | -1.876257029 | 0.002536323 | Under expressed |
| NM_001104929.1 | -1.875362011 | 0.073189527 | Under expressed |
| XR_003587291.1 | -1.873512304 | 0.000979204 | Under expressed |
| XM_027971825.1 | -1.87344563  | 0.097078287 | Under expressed |
| XM_027964538.1 | -1.873066262 | 0.060480173 | Under expressed |
| XM_027963094.1 | -1.872826653 | 0.005897738 | Under expressed |
| XM_027964704.1 | -1.871613732 | 0.089254162 | Under expressed |
| XM_027974154.1 | -1.871401976 | 0.117748156 | Under expressed |
| XM_012175410.3 | -1.869626659 | 0.00652663  | Under expressed |
| XM_012176887.2 | -1.867291278 | 0.020180848 | Under expressed |
| NM_001166191.1 | -1.867241188 | 0.007216024 | Under expressed |
| XM_027961745.1 | -1.866075394 | 0.032574721 | Under expressed |
| XM_027959563.1 | -1.862405836 | 0.147752049 | Under expressed |
| XM_004016392.4 | -1.862238759 | 0.003150734 | Under expressed |
| XM_015093087.2 | -1.861706896 | 0.096013641 | Under expressed |
| XM_004009450.4 | -1.857931703 | 0.0500956   | Under expressed |
| XM_027974632.1 | -1.857256533 | 0.034011567 | Under expressed |
| XM_027973548.1 | -1.855682729 | 0.025501467 | Under expressed |
| XM_004014976.4 | -1.855662666 | 0.114196429 | Under expressed |
| XM_027958202.1 | -1.853459461 | 0.049800864 | Under expressed |
| XM_004016983.4 | -1.853405618 | 0.023161265 | Under expressed |
| XR_003588876.1 | -1.852816755 | 0.006141227 | Under expressed |
| XM_004006025.4 | -1.851689404 | 0.009939424 | Under expressed |
| XM_012166271.3 | -1.850946634 | 0.002236757 | Under expressed |
| XM_004004520.3 | -1.848936047 | 0.093062156 | Under expressed |
| XM_004010646.4 | -1.84785194  | 0.00736327  | Under expressed |
| XM_004010662.4 | -1.84702209  | 0.000509026 | Under expressed |
| XM_012188287.3 | -1.846789453 | 0.115713742 | Under expressed |
| XM_027970915.1 | -1.846711912 | 5.79E-05    | Under expressed |
| XM_004022345.3 | -1.84416346  | 0.035935522 | Under expressed |
| XM_012181288.3 | -1.841608675 | 0.049948168 | Under expressed |
| XM_004009683.4 | -1.840460827 | 0.116757225 | Under expressed |
| XM_027973693.1 | -1.840372048 | 0.056472868 | Under expressed |
| XM_012123470.3 | -1.839700392 | 0.013559821 | Under expressed |
| XM_015093369.2 | -1.838465758 | 0.008545722 | Under expressed |
| XM_004002203.4 | -1.837943065 | 0.044117137 | Under expressed |
| XM_015094428.2 | -1.836982092 | 5.34E-06    | Under expressed |
| XM_004008102.3 | -1.83661296  | 0.006558568 | Under expressed |
| XM_027961765.1 | -1.835548586 | 0.024990657 | Under expressed |
| XM_004004364.4 | -1.835249683 | 0.016004599 | Under expressed |
| XM_027978921.1 | -1.834726724 | 0.01953568  | Under expressed |
| XM_012174832.3 | -1.832914883 | 0.014883772 | Under expressed |

|                |              |             |                 |
|----------------|--------------|-------------|-----------------|
| XM_004016168.4 | -1.828010309 | 0.120597537 | Under expressed |
| XM_027956264.1 | -1.827617116 | 0.111083299 | Under expressed |
| XM_004010481.4 | -1.826338064 | 0.016767734 | Under expressed |
| XM_004013756.4 | -1.82427591  | 0.127289533 | Under expressed |
| XM_004013018.4 | -1.820983364 | 0.007139639 | Under expressed |
| XM_004014916.4 | -1.818179997 | 0.09252059  | Under expressed |
| XM_012095379.3 | -1.818016858 | 0.004224938 | Under expressed |
| XM_004002229.4 | -1.816842398 | 0.039306344 | Under expressed |
| XM_004011129.3 | -1.814860381 | 0.075520292 | Under expressed |
| XR_001434709.2 | -1.814380181 | 0.002350597 | Under expressed |
| XM_012101700.3 | -1.813424615 | 0.046931213 | Under expressed |
| XM_004020195.4 | -1.81328828  | 0.008616488 | Under expressed |
| XM_027961881.1 | -1.812103738 | 0.034075311 | Under expressed |
| XM_004006796.4 | -1.809456779 | 0.126743729 | Under expressed |
| XM_004020200.4 | -1.808728036 | 0.086048531 | Under expressed |
| XM_004014312.4 | -1.808123003 | 0.042463431 | Under expressed |
| XR_001042183.3 | -1.807733674 | 0.001485509 | Under expressed |
| XM_027975151.1 | -1.807714652 | 0.033731472 | Under expressed |
| XM_004013732.4 | -1.807478383 | 0.137884717 | Under expressed |
| XR_003587321.1 | -1.806831848 | 1.21E-08    | Under expressed |
| XM_027962135.1 | -1.805970101 | 0.0301931   | Under expressed |
| XM_015094881.2 | -1.805081659 | 0.119883856 | Under expressed |
| XM_027970985.1 | -1.803644046 | 0.01179945  | Under expressed |
| XM_027964543.1 | -1.803340817 | 0.002427433 | Under expressed |
| XM_012097392.2 | -1.802816609 | 1.89E-08    | Under expressed |
| XM_027972135.1 | -1.802810864 | 0.147101445 | Under expressed |
| XM_027965897.1 | -1.802278204 | 0.001802194 | Under expressed |
| NM_001025110.1 | -1.801314249 | 8.11E-05    | Under expressed |
| XM_015098590.2 | -1.801282631 | 0.000473384 | Under expressed |
| XM_004010428.4 | -1.799887316 | 0.048674569 | Under expressed |
| XM_004004454.4 | -1.79969687  | 0.011951962 | Under expressed |
| XM_015101936.2 | -1.799481058 | 0.000478565 | Under expressed |
| XM_027979981.1 | -1.799289691 | 0.028376806 | Under expressed |
| XM_004018337.4 | -1.798875838 | 0.094592043 | Under expressed |
| XM_004012098.4 | -1.79305722  | 0.030144416 | Under expressed |
| XM_004012827.4 | -1.792186284 | 0.01724588  | Under expressed |
| XM_015104633.2 | -1.788950995 | 0.030611625 | Under expressed |
| XM_015100149.2 | -1.788858934 | 0.102443706 | Under expressed |
| XM_015103685.2 | -1.788466111 | 0.130812146 | Under expressed |
| XM_015096628.2 | -1.78764619  | 0.138021514 | Under expressed |
| XM_027956254.1 | -1.787379599 | 0.007348011 | Under expressed |
| XM_027979151.1 | -1.78726536  | 0.017406573 | Under expressed |
| XR_003587200.1 | -1.786600198 | 0.008768154 | Under expressed |
| XM_004006496.4 | -1.786511643 | 0.018172911 | Under expressed |

|                |              |             |                 |
|----------------|--------------|-------------|-----------------|
| XM_015096439.2 | -1.784837706 | 0.046533231 | Under expressed |
| XM_027970039.1 | -1.783202933 | 0.026567364 | Under expressed |
| XM_027970755.1 | -1.783112731 | 0.024578058 | Under expressed |
| XM_012182449.3 | -1.781875321 | 4.06E-05    | Under expressed |
| XM_015099702.2 | -1.780972858 | 0.021320172 | Under expressed |
| XM_027978431.1 | -1.777643653 | 0.038845458 | Under expressed |
| XM_004004106.4 | -1.776434565 | 0.017165079 | Under expressed |
| XM_027976278.1 | -1.774968014 | 0.019558062 | Under expressed |
| XM_015094459.2 | -1.769710055 | 0.020033532 | Under expressed |
| XM_027978669.1 | -1.769224088 | 0.008452279 | Under expressed |
| XM_004016887.4 | -1.769036863 | 0.043089562 | Under expressed |
| XM_004015460.4 | -1.768824202 | 0.030997269 | Under expressed |
| XR_003586942.1 | -1.768205416 | 0.002123212 | Under expressed |
| XM_012159435.3 | -1.768203586 | 0.109608148 | Under expressed |
| XM_004014564.4 | -1.768055276 | 0.017091618 | Under expressed |
| XR_003588738.1 | -1.767986904 | 0.130933705 | Under expressed |
| XM_004004736.4 | -1.767729484 | 0.142857232 | Under expressed |
| XM_004019457.3 | -1.764108151 | 0.078383124 | Under expressed |
| XM_004020476.4 | -1.764050057 | 0.026898471 | Under expressed |
| XM_004014278.4 | -1.762911452 | 0.039631606 | Under expressed |
| XM_004012146.4 | -1.762883792 | 0.00652663  | Under expressed |
| NM_001287465.1 | -1.762771472 | 0.042329928 | Under expressed |
| XM_015091971.2 | -1.76089872  | 0.025252024 | Under expressed |
| XM_012106891.3 | -1.759819141 | 0.037456646 | Under expressed |
| XM_015103679.2 | -1.759412877 | 0.002048159 | Under expressed |
| XM_004018876.4 | -1.758738886 | 0.093839059 | Under expressed |
| XM_004006684.4 | -1.756842094 | 0.115140466 | Under expressed |
| XM_004016996.4 | -1.753063479 | 0.000494498 | Under expressed |
| XM_027961326.1 | -1.752480213 | 0.005046768 | Under expressed |
| XM_027964562.1 | -1.752352204 | 0.023199743 | Under expressed |
| XM_004010216.4 | -1.75220689  | 0.051021572 | Under expressed |
| XM_004004368.4 | -1.751822211 | 0.078188975 | Under expressed |
| XM_027971886.1 | -1.751424602 | 0.088730558 | Under expressed |
| XM_004005728.3 | -1.750320449 | 0.101379457 | Under expressed |
| XM_004004259.4 | -1.748180189 | 0.00372592  | Under expressed |
| XM_012187720.3 | -1.74772553  | 0.002440398 | Under expressed |
| XM_012182826.3 | -1.746705901 | 0.010179723 | Under expressed |
| XM_027963792.1 | -1.740913006 | 0.002820809 | Under expressed |
| XM_004012838.4 | -1.740821776 | 0.0001793   | Under expressed |
| XM_027961708.1 | -1.739976606 | 0.133159195 | Under expressed |
| XM_015096447.2 | -1.73988194  | 0.027480359 | Under expressed |
| XM_027968174.1 | -1.738559107 | 0.075246904 | Under expressed |
| XM_027967732.1 | -1.736341144 | 0.044142776 | Under expressed |
| XR_003589868.1 | -1.734167111 | 0.035934028 | Under expressed |



|                |              |             |                 |
|----------------|--------------|-------------|-----------------|
| XM_004016121.4 | -1.733620005 | 0.073591388 | Under expressed |
| XM_004002835.4 | -1.73339006  | 0.114734629 | Under expressed |
| XM_004007878.3 | -1.733356866 | 0.00027703  | Under expressed |
| XM_004014623.4 | -1.731457899 | 0.028342289 | Under expressed |
| XM_015096041.2 | -1.731215497 | 0.037329918 | Under expressed |
| XM_004006399.4 | -1.731112119 | 0.134084441 | Under expressed |
| XM_004015118.4 | -1.730734123 | 0.024739644 | Under expressed |
| XM_015102332.2 | -1.730366623 | 0.062853708 | Under expressed |
| XM_004010550.4 | -1.729189347 | 0.028727397 | Under expressed |
| XM_015096230.2 | -1.728782106 | 0.146388155 | Under expressed |
| XM_004004465.4 | -1.728775249 | 0.115767313 | Under expressed |
| XM_004010233.3 | -1.72724821  | 0.040192347 | Under expressed |
| XR_003591185.1 | -1.725547753 | 0.093173579 | Under expressed |
| XM_004018846.4 | -1.725191    | 0.015079196 | Under expressed |
| XM_012188647.3 | -1.725114366 | 0.13846551  | Under expressed |
| XM_027979624.1 | -1.723444196 | 0.116339591 | Under expressed |
| XM_004010779.4 | -1.723343885 | 0.021182952 | Under expressed |
| XM_027973232.1 | -1.723155662 | 0.000831219 | Under expressed |
| XM_027963567.1 | -1.722215274 | 0.099728554 | Under expressed |
| XM_015092541.2 | -1.720063322 | 0.098453336 | Under expressed |
| XM_004016853.4 | -1.716713135 | 0.001807768 | Under expressed |
| XM_027971958.1 | -1.715440396 | 0.115954368 | Under expressed |
| XM_027975762.1 | -1.715263434 | 0.012538451 | Under expressed |
| XM_004016462.4 | -1.714906077 | 0.012422835 | Under expressed |
| XM_027971038.1 | -1.714707629 | 0.014874463 | Under expressed |
| XM_012175434.3 | -1.714536213 | 0.144032633 | Under expressed |
| XM_015104995.2 | -1.714502479 | 0.048171702 | Under expressed |
| XM_027964493.1 | -1.713581322 | 0.000643223 | Under expressed |
| XM_027972500.1 | -1.713496564 | 0.062740582 | Under expressed |
| XM_004012959.4 | -1.713465504 | 0.00604876  | Under expressed |
| XM_027970452.1 | -1.713421038 | 0.149734613 | Under expressed |
| XM_027960749.1 | -1.713233093 | 0.060480173 | Under expressed |
| XM_027972625.1 | -1.708010202 | 0.048171702 | Under expressed |
| XM_015104377.2 | -1.707592568 | 0.018362321 | Under expressed |
| XM_012127464.3 | -1.707533133 | 0.055900731 | Under expressed |
| XM_012186039.3 | -1.705786872 | 0.045405495 | Under expressed |
| XM_027976154.1 | -1.704370922 | 0.06557683  | Under expressed |
| XM_027964604.1 | -1.704139583 | 0.043038278 | Under expressed |
| XM_012110487.3 | -1.703493055 | 0.002546553 | Under expressed |
| XM_004005902.4 | -1.701002066 | 0.113125338 | Under expressed |
| XM_015093043.2 | -1.700330689 | 0.008659495 | Under expressed |
| XM_027965703.1 | -1.699716473 | 0.049526479 | Under expressed |
| XM_027963821.1 | -1.699551031 | 0.013559821 | Under expressed |
| XM_027975284.1 | -1.69931368  | 0.120679402 | Under expressed |

|                |              |             |                 |
|----------------|--------------|-------------|-----------------|
| XM_027972892.1 | -1.699065045 | 0.046410217 | Under expressed |
| XM_027964181.1 | -1.698885319 | 0.001779566 | Under expressed |
| XM_015094369.2 | -1.697429112 | 0.084883641 | Under expressed |
| XM_004010718.4 | -1.697392618 | 0.142676804 | Under expressed |
| XM_027965029.1 | -1.696865017 | 0.137070471 | Under expressed |
| XM_027958330.1 | -1.695666365 | 0.121703652 | Under expressed |
| XM_012106862.3 | -1.695514093 | 0.026225941 | Under expressed |
| XM_015094590.2 | -1.694904733 | 0.057313324 | Under expressed |
| XM_004006569.4 | -1.693874839 | 0.031014591 | Under expressed |
| XM_015102552.2 | -1.693697683 | 0.022303457 | Under expressed |
| XM_027977797.1 | -1.693535693 | 0.083679115 | Under expressed |
| XM_027979366.1 | -1.692358308 | 0.060846925 | Under expressed |
| XM_004011964.4 | -1.69135136  | 0.047113604 | Under expressed |
| XM_027974291.1 | -1.687515765 | 0.036235275 | Under expressed |
| XM_027968109.1 | -1.68559795  | 0.047690331 | Under expressed |
| XM_004008091.3 | -1.682911016 | 0.079836256 | Under expressed |
| XM_015101260.2 | -1.682820218 | 0.008845687 | Under expressed |
| XM_027970115.1 | -1.682322332 | 0.109135099 | Under expressed |
| XM_004003234.4 | -1.68065614  | 0.019823259 | Under expressed |
| XM_027965588.1 | -1.680582912 | 0.072140886 | Under expressed |
| XM_015091851.2 | -1.680504582 | 0.02170058  | Under expressed |
| XM_004016078.4 | -1.680472952 | 0.060418906 | Under expressed |
| XM_004003880.4 | -1.679315947 | 0.143864565 | Under expressed |
| XM_012132979.2 | -1.678877347 | 0.008961388 | Under expressed |
| XR_001024035.2 | -1.678227094 | 0.001969923 | Under expressed |
| XM_004004013.4 | -1.677523705 | 0.008845687 | Under expressed |
| XM_004023488.4 | -1.675562838 | 0.073745649 | Under expressed |
| XM_027976001.1 | -1.674005858 | 0.127703235 | Under expressed |
| XM_027960504.1 | -1.672126819 | 0.00372592  | Under expressed |
| XM_004012192.4 | -1.671356828 | 0.011704526 | Under expressed |
| XM_004021779.4 | -1.671312641 | 0.021639394 | Under expressed |
| XM_004004233.4 | -1.670044351 | 0.12392445  | Under expressed |
| XM_012182731.2 | -1.665151688 | 0.005463185 | Under expressed |
| XM_004013874.3 | -1.663326819 | 0.016468414 | Under expressed |
| XM_004010659.4 | -1.663023904 | 0.073508015 | Under expressed |
| XM_027975331.1 | -1.662331845 | 0.041234351 | Under expressed |
| XM_004018005.4 | -1.661876625 | 0.007167606 | Under expressed |
| XM_015098136.2 | -1.661571664 | 0.128337423 | Under expressed |
| XM_004021354.4 | -1.661510705 | 0.00915629  | Under expressed |
| XM_027976878.1 | -1.661205494 | 0.095211005 | Under expressed |
| XM_027973176.1 | -1.661084899 | 0.084223096 | Under expressed |
| XM_004011705.3 | -1.660356526 | 0.082719313 | Under expressed |
| XM_027960750.1 | -1.659787931 | 0.057416218 | Under expressed |
| XM_027974675.1 | -1.658034629 | 0.010586881 | Under expressed |

|                |              |             |                 |
|----------------|--------------|-------------|-----------------|
| XM_027972626.1 | -1.657450417 | 0.145341556 | Under expressed |
| XM_027957342.1 | -1.656189085 | 0.005199432 | Under expressed |
| XM_027979513.1 | -1.654993855 | 0.054640495 | Under expressed |
| XM_027972094.1 | -1.653827675 | 0.017914835 | Under expressed |
| XM_004008893.4 | -1.65300556  | 0.041472179 | Under expressed |
| XM_027957043.1 | -1.652739022 | 0.003057442 | Under expressed |
| NM_001009432.1 | -1.65232214  | 0.094030309 | Under expressed |
| XM_004003199.4 | -1.651641984 | 0.033453964 | Under expressed |
| XM_027966382.1 | -1.65125614  | 0.053640158 | Under expressed |
| XM_027956753.1 | -1.650307608 | 0.081013101 | Under expressed |
| XM_012098298.2 | -1.649726901 | 0.044961253 | Under expressed |
| XM_027967676.1 | -1.649026468 | 0.040041218 | Under expressed |
| XM_004011383.4 | -1.648905047 | 0.079801577 | Under expressed |
| XM_027966782.1 | -1.647930352 | 5.14E-06    | Under expressed |
| XM_004023649.3 | -1.646135766 | 0.080833581 | Under expressed |
| XM_004022178.4 | -1.643811377 | 0.000254043 | Under expressed |
| XM_004011156.3 | -1.643743812 | 0.054989114 | Under expressed |
| XM_004004691.4 | -1.642799035 | 0.060021919 | Under expressed |
| XM_027973699.1 | -1.641755853 | 0.090386945 | Under expressed |
| XM_004006797.4 | -1.641286427 | 0.017741268 | Under expressed |
| XM_015093680.2 | -1.64117598  | 0.055685528 | Under expressed |
| XM_027961116.1 | -1.641167604 | 0.015377955 | Under expressed |
| XR_003587472.1 | -1.641018093 | 0.128485516 | Under expressed |
| XM_027980145.1 | -1.640873755 | 0.008617931 | Under expressed |
| XM_004008689.4 | -1.640817604 | 0.004976659 | Under expressed |
| XM_027966778.1 | -1.639855488 | 0.035935522 | Under expressed |
| XM_004010676.4 | -1.639780962 | 0.054657193 | Under expressed |
| XM_004005121.4 | -1.638926294 | 0.013509968 | Under expressed |
| XM_015091600.2 | -1.63871927  | 0.100946922 | Under expressed |
| XM_027972354.1 | -1.637259493 | 0.133584439 | Under expressed |
| XM_004009030.4 | -1.635761085 | 0.024172812 | Under expressed |
| XM_004011208.3 | -1.634073093 | 0.026004483 | Under expressed |
| XM_027977190.1 | -1.632033011 | 0.005940537 | Under expressed |
| XM_004009859.4 | -1.631923297 | 0.111091235 | Under expressed |
| XM_004015332.4 | -1.630502434 | 0.097178042 | Under expressed |
| XM_004007714.3 | -1.630111737 | 0.076846861 | Under expressed |
| XM_004009111.4 | -1.629601937 | 0.001699714 | Under expressed |
| XM_012176906.2 | -1.629042589 | 0.14598292  | Under expressed |
| XM_004019613.4 | -1.626265707 | 0.025346732 | Under expressed |
| XM_027964258.1 | -1.625729541 | 0.142567156 | Under expressed |
| XM_027961291.1 | -1.624494042 | 0.126992313 | Under expressed |
| XM_015098720.2 | -1.624449975 | 0.10561358  | Under expressed |
| XM_004012679.4 | -1.623619848 | 0.00295007  | Under expressed |
| XM_004011722.4 | -1.623084085 | 0.003285759 | Under expressed |

|                |              |             |                 |
|----------------|--------------|-------------|-----------------|
| XM_012101307.2 | -1.623071158 | 0.054989114 | Under expressed |
| XM_012188134.3 | -1.622331522 | 0.063135137 | Under expressed |
| XM_027966696.1 | -1.622011401 | 0.081423408 | Under expressed |
| XM_004011277.4 | -1.621656381 | 0.070637281 | Under expressed |
| XM_004011408.4 | -1.621313346 | 0.003362799 | Under expressed |
| XM_004003309.4 | -1.621299903 | 0.005416515 | Under expressed |
| XM_027974368.1 | -1.620475634 | 0.033309104 | Under expressed |
| XM_027960482.1 | -1.620443404 | 0.087691539 | Under expressed |
| XM_027978863.1 | -1.620182282 | 0.018894982 | Under expressed |
| XM_004004373.4 | -1.617989431 | 0.057852004 | Under expressed |
| XM_027961866.1 | -1.616871922 | 0.029126185 | Under expressed |
| XM_004002262.4 | -1.616794247 | 0.129683168 | Under expressed |
| XM_027972544.1 | -1.61575109  | 0.027856674 | Under expressed |
| XM_027970935.1 | -1.615447223 | 0.032525901 | Under expressed |
| XM_012096987.3 | -1.614795736 | 0.142975133 | Under expressed |
| XM_015100425.2 | -1.614151547 | 0.11185564  | Under expressed |
| NM_001126367.2 | -1.611039463 | 0.076823792 | Under expressed |
| XM_027956234.1 | -1.610861838 | 0.012635303 | Under expressed |
| XM_004003134.4 | -1.609946938 | 0.004272022 | Under expressed |
| XM_004012987.4 | -1.608616593 | 0.007266631 | Under expressed |
| XR_001021684.3 | -1.608088119 | 0.100946922 | Under expressed |
| XM_027960746.1 | -1.606478572 | 0.033810478 | Under expressed |
| XM_004017067.3 | -1.605530195 | 0.04167472  | Under expressed |
| XM_004002076.4 | -1.604147403 | 0.122004654 | Under expressed |
| XM_015103489.2 | -1.60392774  | 0.131403489 | Under expressed |
| XM_027970506.1 | -1.603553101 | 0.015383322 | Under expressed |
| NM_001161865.1 | -1.602253741 | 0.116339591 | Under expressed |
| XM_027967849.1 | -1.602085219 | 0.130933705 | Under expressed |
| XM_027972423.1 | -1.599994406 | 0.115627782 | Under expressed |
| XM_027967211.1 | -1.59994109  | 0.085845743 | Under expressed |
| XM_027965013.1 | -1.597920586 | 0.061913096 | Under expressed |
| XM_004004475.4 | -1.597550702 | 0.020033532 | Under expressed |
| XM_015093478.2 | -1.595714715 | 0.080979427 | Under expressed |
| XM_015097289.2 | -1.595233357 | 0.083974931 | Under expressed |
| XM_027965048.1 | -1.593858579 | 0.070494162 | Under expressed |
| XM_027977495.1 | -1.593436946 | 0.006812258 | Under expressed |
| XM_004022232.4 | -1.592775602 | 0.04177423  | Under expressed |
| XM_027972632.1 | -1.591097812 | 0.106335989 | Under expressed |
| XM_027975327.1 | -1.590783862 | 0.034005553 | Under expressed |
| XM_004015015.3 | -1.590027599 | 0.114196429 | Under expressed |
| XM_004009739.4 | -1.58819295  | 0.02924114  | Under expressed |
| XM_012098138.3 | -1.585328844 | 0.016534079 | Under expressed |
| XM_004021529.3 | -1.584977758 | 0.073189527 | Under expressed |
| XM_012173651.2 | -1.583519265 | 0.021548262 | Under expressed |

|                |              |             |                 |
|----------------|--------------|-------------|-----------------|
| XM_027972281.1 | -1.582944463 | 0.048171702 | Under expressed |
| XR_001434000.2 | -1.582736181 | 0.098453336 | Under expressed |
| XM_027956296.1 | -1.582302062 | 0.112303956 | Under expressed |
| NM_001161889.1 | -1.582053835 | 0.073591388 | Under expressed |
| XM_004015981.4 | -1.581441377 | 0.082416278 | Under expressed |
| XM_004002393.4 | -1.581217697 | 0.11401293  | Under expressed |
| XM_004015998.3 | -1.581167037 | 0.033424884 | Under expressed |
| XM_027972390.1 | -1.580663406 | 0.060235619 | Under expressed |
| XM_027967675.1 | -1.577222617 | 0.016463744 | Under expressed |
| XR_003588777.1 | -1.574872633 | 0.02545668  | Under expressed |
| XM_004011404.4 | -1.574684761 | 0.095415763 | Under expressed |
| XM_027975112.1 | -1.574034753 | 0.137339498 | Under expressed |
| XM_004004446.4 | -1.572123796 | 0.006184162 | Under expressed |
| XM_012186934.3 | -1.57038211  | 0.022689947 | Under expressed |
| XM_015097524.2 | -1.569050528 | 0.010789577 | Under expressed |
| XM_004018425.4 | -1.569031003 | 0.044142776 | Under expressed |
| XM_012168489.3 | -1.567249144 | 0.113919174 | Under expressed |
| XM_012185134.3 | -1.567089815 | 0.047634574 | Under expressed |
| XM_012113177.2 | -1.566818155 | 0.018634289 | Under expressed |
| XM_012173925.3 | -1.564997631 | 0.010915963 | Under expressed |
| XM_004023410.4 | -1.563673445 | 0.057460464 | Under expressed |
| XM_004020762.4 | -1.562679788 | 0.005875034 | Under expressed |
| XM_027967251.1 | -1.562500203 | 0.078496209 | Under expressed |
| XM_027978923.1 | -1.562267496 | 0.001285659 | Under expressed |
| XM_012178284.3 | -1.561804989 | 0.127369752 | Under expressed |
| XM_012142353.3 | -1.559819626 | 0.109608148 | Under expressed |
| XM_004010600.4 | -1.559754381 | 0.04085217  | Under expressed |
| XM_027975285.1 | -1.556819842 | 0.05037297  | Under expressed |
| XM_004011327.3 | -1.556655896 | 0.1039027   | Under expressed |
| XM_004020033.3 | -1.556429478 | 0.02686218  | Under expressed |
| XM_004009046.4 | -1.556000986 | 6.59E-05    | Under expressed |
| XM_004014221.4 | -1.55599078  | 0.07148779  | Under expressed |
| NM_001145185.1 | -1.555291631 | 0.076233534 | Under expressed |
| XR_003586204.1 | -1.555158444 | 0.043432759 | Under expressed |
| XM_027972522.1 | -1.554143679 | 0.052078933 | Under expressed |
| XM_027966436.1 | -1.553193387 | 0.114194937 | Under expressed |
| XM_004012788.4 | -1.552246743 | 0.085729313 | Under expressed |
| XM_004017318.4 | -1.552065726 | 0.00130016  | Under expressed |
| XM_027980301.1 | -1.551635644 | 0.036804468 | Under expressed |
| XM_004019102.4 | -1.548433688 | 0.018061258 | Under expressed |
| XM_004016384.4 | -1.547192447 | 0.121459753 | Under expressed |
| XM_004015002.3 | -1.546894835 | 0.137339498 | Under expressed |
| XM_004014030.4 | -1.546783715 | 0.040905381 | Under expressed |
| XM_004013005.3 | -1.546652041 | 0.022091556 | Under expressed |

|                |              |             |                 |
|----------------|--------------|-------------|-----------------|
| XM_027962330.1 | -1.54650327  | 0.082341258 | Under expressed |
| XM_004017986.4 | -1.546184281 | 0.117761176 | Under expressed |
| XM_027972221.1 | -1.54510787  | 0.145118602 | Under expressed |
| XM_004006668.3 | -1.54470824  | 0.1238171   | Under expressed |
| XM_027977137.1 | -1.544103968 | 0.006830787 | Under expressed |
| XM_027956275.1 | -1.543211635 | 0.053799132 | Under expressed |
| XM_027962625.1 | -1.542816111 | 0.119726866 | Under expressed |
| XM_027970360.1 | -1.541937888 | 0.000312229 | Under expressed |
| XM_012187270.3 | -1.540921788 | 0.018733979 | Under expressed |
| XM_012099704.3 | -1.540706882 | 0.13308255  | Under expressed |
| XM_004017068.4 | -1.54066872  | 0.044867291 | Under expressed |
| XM_004020488.4 | -1.540373615 | 0.114734629 | Under expressed |
| XM_015104411.2 | -1.537684105 | 0.109519562 | Under expressed |
| XM_027968514.1 | -1.535059814 | 0.026424755 | Under expressed |
| XM_015103892.2 | -1.534969427 | 0.02870297  | Under expressed |
| XM_027966317.1 | -1.53459109  | 0.040301781 | Under expressed |
| XM_027972998.1 | -1.533951575 | 0.12804382  | Under expressed |
| XM_004006265.4 | -1.533319584 | 0.0897164   | Under expressed |
| XM_004017924.4 | -1.532706292 | 2.32E-08    | Under expressed |
| XM_027967202.1 | -1.530395138 | 0.023300113 | Under expressed |
| XM_004011183.4 | -1.528887452 | 0.002342774 | Under expressed |
| XM_027971381.1 | -1.527583808 | 0.001444665 | Under expressed |
| XR_001435222.2 | -1.526819857 | 0.057575546 | Under expressed |
| XM_015104450.2 | -1.525848788 | 0.093839059 | Under expressed |
| XM_015099631.2 | -1.524657851 | 0.001560355 | Under expressed |
| XM_027968510.1 | -1.523226973 | 0.083645344 | Under expressed |
| XM_015095342.2 | -1.522414162 | 0.130321725 | Under expressed |
| XM_027973241.1 | -1.522187947 | 0.004630032 | Under expressed |
| XM_004008657.4 | -1.521928741 | 0.015262597 | Under expressed |
| XM_027966272.1 | -1.521431419 | 0.085187659 | Under expressed |
| XM_004018315.3 | -1.521008511 | 0.000292081 | Under expressed |
| XM_004013599.4 | -1.520910017 | 0.121098375 | Under expressed |
| XR_003586274.1 | -1.519331489 | 0.037423609 | Under expressed |
| XM_004021733.4 | -1.518398535 | 0.001259681 | Under expressed |
| XR_003590768.1 | -1.517679547 | 0.143047857 | Under expressed |
| XM_015093178.2 | -1.517585704 | 0.015406898 | Under expressed |
| XM_004021042.4 | -1.517132329 | 3.05E-05    | Under expressed |
| XM_027956330.1 | -1.51315328  | 0.000401367 | Under expressed |
| XM_015103060.2 | -1.511232589 | 0.038337281 | Under expressed |
| XM_004013032.4 | -1.50945751  | 0.016581038 | Under expressed |
| XM_004017817.4 | -1.506521081 | 0.14014596  | Under expressed |
| XM_012162511.3 | -1.506405451 | 0.00520491  | Under expressed |
| XM_004015132.4 | -1.503012043 | 0.006004311 | Under expressed |
| XM_027963724.1 | -1.501824394 | 0.090365753 | Under expressed |

|                |              |             |                 |
|----------------|--------------|-------------|-----------------|
| XM_027977634.1 | -1.501362416 | 0.003470239 | Under expressed |
| XM_027979167.1 | -1.501019841 | 0.021229749 | Under expressed |
| XM_027966890.1 | -1.500285053 | 0.075270666 | Under expressed |
| XM_015098075.2 | -1.498615145 | 0.065918033 | Under expressed |
| XM_004010441.4 | -1.497988612 | 0.133956634 | Under expressed |
| XM_004013623.4 | -1.497665005 | 0.009872716 | Under expressed |
| XM_012120651.3 | -1.496429728 | 0.004225515 | Under expressed |
| XM_012105276.3 | -1.495794244 | 0.139457359 | Under expressed |
| NM_001163056.1 | -1.493499764 | 0.010607269 | Under expressed |
| XM_027972502.1 | -1.490229006 | 0.124154399 | Under expressed |
| XM_012133890.3 | -1.489096351 | 0.142690967 | Under expressed |
| XM_015099365.2 | -1.486569684 | 0.094066078 | Under expressed |
| XM_012190257.3 | -1.486263202 | 0.000276847 | Under expressed |
| XM_027971185.1 | -1.486062841 | 0.109135099 | Under expressed |
| XR_003586217.1 | -1.485836195 | 0.097906682 | Under expressed |
| XM_004002956.4 | -1.483937992 | 0.029126185 | Under expressed |
| XM_004022004.4 | -1.483260451 | 0.009334221 | Under expressed |
| XM_004008675.4 | -1.482273856 | 0.012238846 | Under expressed |
| XM_027973601.1 | -1.480727074 | 0.101205531 | Under expressed |
| XM_027966936.1 | -1.480455787 | 0.008040319 | Under expressed |
| XM_027971135.1 | -1.479160307 | 0.013657581 | Under expressed |
| XM_015095184.2 | -1.478989124 | 0.003450801 | Under expressed |
| XM_004002302.3 | -1.478699488 | 0.021124401 | Under expressed |
| XM_027959332.1 | -1.478446775 | 0.037391752 | Under expressed |
| XM_012137139.3 | -1.478329266 | 0.000642333 | Under expressed |
| XM_004002217.4 | -1.477943907 | 0.111908316 | Under expressed |
| XM_004011859.4 | -1.477643494 | 0.015923826 | Under expressed |
| XM_004016902.4 | -1.477540099 | 0.120122994 | Under expressed |
| XM_012175461.3 | -1.476295601 | 0.069503187 | Under expressed |
| XM_004017282.4 | -1.475417687 | 0.07934326  | Under expressed |
| XM_004021431.4 | -1.474496263 | 0.088840036 | Under expressed |
| XM_015103326.2 | -1.473499697 | 0.014287905 | Under expressed |
| XM_027978122.1 | -1.470733008 | 0.01795119  | Under expressed |
| XM_027956248.1 | -1.469374434 | 0.11560351  | Under expressed |
| XM_027958081.1 | -1.468844832 | 0.113628781 | Under expressed |
| XM_027978868.1 | -1.468540446 | 0.005581919 | Under expressed |
| XM_004013673.3 | -1.468372497 | 0.073388282 | Under expressed |
| XM_004011202.4 | -1.467061417 | 0.01060164  | Under expressed |
| XM_004011797.4 | -1.466113762 | 0.000936587 | Under expressed |
| XM_027961195.1 | -1.466065945 | 0.006191794 | Under expressed |
| XM_004017458.4 | -1.465033095 | 0.035516273 | Under expressed |
| XM_004017069.4 | -1.463808883 | 0.07087811  | Under expressed |
| XM_004011714.4 | -1.463228123 | 0.11898354  | Under expressed |
| XM_012116190.2 | -1.461188808 | 0.064251997 | Under expressed |

|                |              |             |                 |
|----------------|--------------|-------------|-----------------|
| XM_027960683.1 | -1.460862536 | 0.011386162 | Under expressed |
| XM_027978324.1 | -1.459979863 | 0.141648127 | Under expressed |
| XM_004011238.4 | -1.459147699 | 0.063445055 | Under expressed |
| XM_004011729.3 | -1.459021769 | 0.05098375  | Under expressed |
| XM_027978743.1 | -1.455744449 | 0.010989268 | Under expressed |
| XM_012107546.3 | -1.455383567 | 0.03659084  | Under expressed |
| XM_015092739.2 | -1.455355812 | 0.099922906 | Under expressed |
| XM_004012158.4 | -1.453824384 | 0.091510024 | Under expressed |
| XM_027959166.1 | -1.453540184 | 0.061886192 | Under expressed |
| XM_027973600.1 | -1.453341599 | 0.002496539 | Under expressed |
| XM_027974232.1 | -1.452854288 | 0.022386677 | Under expressed |
| XM_027966660.1 | -1.452442545 | 2.39E-08    | Under expressed |
| XM_004004225.3 | -1.451172388 | 0.021421875 | Under expressed |
| XM_027968745.1 | -1.449258465 | 1.92E-07    | Under expressed |
| XM_027967325.1 | -1.449079577 | 0.078076941 | Under expressed |
| XM_027979702.1 | -1.448311567 | 0.006025018 | Under expressed |
| XM_012097517.3 | -1.446353321 | 0.092596225 | Under expressed |
| XM_027972368.1 | -1.446337888 | 0.128230622 | Under expressed |
| XM_004006798.4 | -1.441119994 | 0.002499074 | Under expressed |
| XM_027966920.1 | -1.439775791 | 0.000510182 | Under expressed |
| XM_012180829.3 | -1.437780742 | 0.007821905 | Under expressed |
| XM_027961497.1 | -1.437589181 | 0.132347662 | Under expressed |
| XM_004021421.4 | -1.43749268  | 0.057670162 | Under expressed |
| XM_004004870.4 | -1.437434419 | 0.026813214 | Under expressed |
| XM_027975952.1 | -1.436863026 | 0.139216841 | Under expressed |
| XM_027959869.1 | -1.43676156  | 0.01795119  | Under expressed |
| XM_027958083.1 | -1.435289111 | 0.147422528 | Under expressed |
| XM_004007863.4 | -1.430557511 | 0.086104836 | Under expressed |
| XM_004006039.4 | -1.427406737 | 0.054785296 | Under expressed |
| XM_004009829.3 | -1.426314733 | 0.125147887 | Under expressed |
| XM_015091873.2 | -1.42609962  | 0.129822452 | Under expressed |
| XM_004005715.4 | -1.425446798 | 0.018061599 | Under expressed |
| XM_027961779.1 | -1.425055708 | 0.024690172 | Under expressed |
| XM_027976837.1 | -1.424268858 | 0.043073883 | Under expressed |
| XR_003589709.1 | -1.423196845 | 0.050943756 | Under expressed |
| XR_001023239.3 | -1.423032345 | 0.000420255 | Under expressed |
| XM_027977798.1 | -1.420140273 | 0.104618029 | Under expressed |
| XM_012183173.3 | -1.42012706  | 0.061847952 | Under expressed |
| XM_012181884.3 | -1.419655539 | 0.008805434 | Under expressed |
| XM_027975969.1 | -1.419525957 | 0.061431822 | Under expressed |
| XM_004013038.4 | -1.41888796  | 0.098453336 | Under expressed |
| XM_004008955.3 | -1.417988386 | 0.00054657  | Under expressed |
| XM_004017365.4 | -1.41793407  | 0.06125059  | Under expressed |
| XM_004017438.4 | -1.417143494 | 0.149734613 | Under expressed |



|                |              |             |                 |
|----------------|--------------|-------------|-----------------|
| XM_004016913.4 | -1.416483745 | 0.141322302 | Under expressed |
| XM_027976496.1 | -1.4162736   | 0.057737215 | Under expressed |
| XM_027971721.1 | -1.415694898 | 0.002894228 | Under expressed |
| NM_001009765.1 | -1.414678264 | 0.053033863 | Under expressed |
| XM_027958120.1 | -1.413636501 | 0.11401293  | Under expressed |
| XM_012174662.3 | -1.410814728 | 0.085541994 | Under expressed |
| XM_027968566.1 | -1.410045474 | 0.058934401 | Under expressed |
| XM_015095730.2 | -1.407915723 | 0.149437976 | Under expressed |
| XR_173470.3    | -1.407622653 | 0.041819988 | Under expressed |
| XM_012185875.2 | -1.407190357 | 0.005199432 | Under expressed |
| XM_027979690.1 | -1.406899616 | 0.142639137 | Under expressed |
| XR_001435100.2 | -1.405632726 | 0.00846433  | Under expressed |
| XM_004013003.4 | -1.404297284 | 0.136149077 | Under expressed |
| XM_027958257.1 | -1.404010419 | 0.002474541 | Under expressed |
| XM_015094394.2 | -1.403829133 | 0.055147636 | Under expressed |
| NM_001285801.1 | -1.403409415 | 0.13313411  | Under expressed |
| XM_027958182.1 | -1.403147406 | 0.089666629 | Under expressed |
| XM_004005841.3 | -1.402271729 | 0.128596432 | Under expressed |
| XM_004021747.4 | -1.400988096 | 0.121107073 | Under expressed |
| XM_015092018.2 | -1.400698036 | 0.114601025 | Under expressed |
| XM_027976730.1 | -1.400551894 | 0.023350651 | Under expressed |
| XM_012100862.3 | -1.400031378 | 0.140644714 | Under expressed |
| XM_012181791.3 | -1.398180336 | 0.040249175 | Under expressed |
| XM_027965346.1 | -1.397807052 | 0.12197309  | Under expressed |
| XM_027965526.1 | -1.39668777  | 0.12754839  | Under expressed |
| XM_015102005.2 | -1.395372862 | 1.25E-05    | Under expressed |
| XM_015097802.2 | -1.394589459 | 0.050134426 | Under expressed |
| XM_004009922.4 | -1.39429617  | 0.004299885 | Under expressed |
| XM_004011265.4 | -1.391812463 | 0.077752099 | Under expressed |
| XM_027964587.1 | -1.390596544 | 0.003532941 | Under expressed |
| XM_027977194.1 | -1.389837362 | 0.009043296 | Under expressed |
| XM_004005797.4 | -1.386610367 | 2.10E-06    | Under expressed |
| XM_004012482.4 | -1.386190264 | 0.123706657 | Under expressed |
| XM_027958589.1 | -1.385712405 | 0.004594698 | Under expressed |
| XM_027974871.1 | -1.385593596 | 0.001236453 | Under expressed |
| XM_004013902.4 | -1.383272427 | 0.081599705 | Under expressed |
| XR_001023055.3 | -1.381986093 | 0.109135099 | Under expressed |
| XR_003589146.1 | -1.381068197 | 0.04867172  | Under expressed |
| XM_015095380.2 | -1.381012398 | 0.061303481 | Under expressed |
| XM_004018197.4 | -1.380422587 | 0.017229345 | Under expressed |
| XM_004004371.3 | -1.379649379 | 0.040905381 | Under expressed |
| XM_027976703.1 | -1.378595775 | 0.091428569 | Under expressed |
| XM_027977301.1 | -1.378140826 | 0.10065828  | Under expressed |
| XM_012097890.2 | -1.377837284 | 0.052931225 | Under expressed |

|                |              |             |                 |
|----------------|--------------|-------------|-----------------|
| XM_004008108.4 | -1.377049421 | 0.068050639 | Under expressed |
| XM_027972450.1 | -1.376985472 | 9.23E-05    | Under expressed |
| XM_015104150.2 | -1.376947963 | 0.013938911 | Under expressed |
| NM_001306123.1 | -1.376621119 | 0.005249634 | Under expressed |
| XM_004003115.4 | -1.375906703 | 0.013372331 | Under expressed |
| XM_012097639.3 | -1.375517524 | 0.142676804 | Under expressed |
| XM_027967131.1 | -1.373862697 | 0.094634355 | Under expressed |
| XM_015094378.2 | -1.373258978 | 0.01120223  | Under expressed |
| XM_012179883.3 | -1.372356373 | 0.006653519 | Under expressed |
| XM_004006425.4 | -1.372201606 | 0.001358998 | Under expressed |
| XM_012097393.3 | -1.371555151 | 0.055278649 | Under expressed |
| XM_012096203.3 | -1.371204116 | 0.08305718  | Under expressed |
| XM_027967239.1 | -1.369436402 | 0.006288141 | Under expressed |
| XM_015097121.2 | -1.368813326 | 0.020010326 | Under expressed |
| XM_004007725.3 | -1.367707779 | 0.069059029 | Under expressed |
| XM_004018518.4 | -1.367121482 | 0.098453336 | Under expressed |
| XM_015096799.2 | -1.366977929 | 0.146691955 | Under expressed |
| XM_004010769.4 | -1.366555606 | 0.003883782 | Under expressed |
| XM_027972267.1 | -1.362920798 | 0.118566323 | Under expressed |
| XM_012098936.3 | -1.362771157 | 0.020355676 | Under expressed |
| XM_004011248.4 | -1.361979127 | 0.094444099 | Under expressed |
| XM_004020510.4 | -1.361236934 | 0.109485006 | Under expressed |
| XM_004001991.4 | -1.360669972 | 0.012245425 | Under expressed |
| XM_004002792.4 | -1.360369145 | 0.083066409 | Under expressed |
| XM_027961901.1 | -1.360316847 | 0.053434304 | Under expressed |
| XM_027957825.1 | -1.358325684 | 0.135732062 | Under expressed |
| XM_004009022.4 | -1.358123439 | 0.048024432 | Under expressed |
| XM_004008500.4 | -1.357905136 | 0.00857931  | Under expressed |
| XM_012139743.3 | -1.357352923 | 0.00746071  | Under expressed |
| XM_027972220.1 | -1.35719204  | 0.09497726  | Under expressed |
| XM_012162838.3 | -1.356814484 | 0.101934011 | Under expressed |
| XM_027970549.1 | -1.356437889 | 0.027450496 | Under expressed |
| XM_027965176.1 | -1.355330078 | 0.062748005 | Under expressed |
| XM_004009048.4 | -1.355226685 | 0.015262597 | Under expressed |
| XM_004004727.4 | -1.354975424 | 0.035795462 | Under expressed |
| XM_012102124.3 | -1.354740408 | 0.063153816 | Under expressed |
| XM_004005777.4 | -1.354462707 | 0.116327325 | Under expressed |
| XM_027961696.1 | -1.354406722 | 0.131249752 | Under expressed |
| XM_015099595.2 | -1.354086926 | 0.061571085 | Under expressed |
| XM_015102542.2 | -1.353237797 | 0.040180482 | Under expressed |
| XM_027964979.1 | -1.352771479 | 0.055213011 | Under expressed |
| XM_004014340.4 | -1.352023014 | 0.058765294 | Under expressed |
| XM_004006708.4 | -1.350514916 | 0.019461581 | Under expressed |
| XM_027977454.1 | -1.350430326 | 0.016610802 | Under expressed |

|                |              |             |                 |
|----------------|--------------|-------------|-----------------|
| XM_004009652.4 | -1.349721697 | 0.055890225 | Under expressed |
| XM_004002669.4 | -1.34918925  | 0.029106149 | Under expressed |
| XM_004012221.4 | -1.348029749 | 0.134743533 | Under expressed |
| XM_027961155.1 | -1.344339067 | 0.081599705 | Under expressed |
| XM_027977307.1 | -1.34401015  | 0.070494162 | Under expressed |
| XM_027977849.1 | -1.342916552 | 0.077029893 | Under expressed |
| XM_004005829.4 | -1.342810108 | 0.025140065 | Under expressed |
| XM_004012799.4 | -1.341152122 | 0.008363405 | Under expressed |
| NM_001129741.1 | -1.34030608  | 0.078272281 | Under expressed |
| XM_004006835.4 | -1.340169595 | 0.084518502 | Under expressed |
| XM_004012476.4 | -1.339927812 | 0.074207643 | Under expressed |
| XM_004017231.4 | -1.33808787  | 0.010579015 | Under expressed |
| XM_027978680.1 | -1.337917785 | 1.19E-05    | Under expressed |
| XM_004006488.4 | -1.337266563 | 0.00438745  | Under expressed |
| XR_003586280.1 | -1.334874023 | 0.134188408 | Under expressed |
| XM_004017405.4 | -1.333010055 | 0.130933705 | Under expressed |
| XM_004005116.3 | -1.332938846 | 0.148489889 | Under expressed |
| XM_027962603.1 | -1.331442543 | 0.045256103 | Under expressed |
| XM_004004043.3 | -1.331059447 | 0.094310525 | Under expressed |
| XM_027961577.1 | -1.330624619 | 0.090253103 | Under expressed |
| XM_015096632.2 | -1.330573965 | 0.024714789 | Under expressed |
| XM_015093177.2 | -1.329864776 | 0.10197323  | Under expressed |
| XM_004009006.4 | -1.329733172 | 0.043085938 | Under expressed |
| XM_004011660.4 | -1.32965191  | 0.050342417 | Under expressed |
| XM_004012406.4 | -1.328819564 | 0.001525587 | Under expressed |
| XM_027962450.1 | -1.326746293 | 0.133956634 | Under expressed |
| XM_027960932.1 | -1.326337707 | 0.035594283 | Under expressed |
| XM_012178564.3 | -1.32536685  | 0.005533585 | Under expressed |
| XM_004002826.4 | -1.324235616 | 0.006204916 | Under expressed |
| XM_027975343.1 | -1.322788155 | 1.07E-05    | Under expressed |
| XM_027972014.1 | -1.322442307 | 0.001221522 | Under expressed |
| XM_027976207.1 | -1.321669697 | 0.012961531 | Under expressed |
| XM_004003420.3 | -1.313330994 | 0.054864137 | Under expressed |
| XM_027961844.1 | -1.312785608 | 0.025010063 | Under expressed |
| XM_027975255.1 | -1.312608147 | 0.127903557 | Under expressed |
| XM_027959008.1 | -1.312391268 | 0.055900731 | Under expressed |
| XM_004006014.4 | -1.311493691 | 0.017763518 | Under expressed |
| XM_027964182.1 | -1.310440017 | 0.026332895 | Under expressed |
| XM_004006104.4 | -1.310423057 | 0.0897164   | Under expressed |
| XM_004008793.4 | -1.307813355 | 0.133584439 | Under expressed |
| XM_004006701.4 | -1.307168312 | 0.002053308 | Under expressed |
| XM_012098800.3 | -1.307161624 | 0.122944123 | Under expressed |
| XM_027974463.1 | -1.3068728   | 0.048660169 | Under expressed |
| XM_004006982.4 | -1.306838535 | 0.117290662 | Under expressed |

|                |              |             |                 |
|----------------|--------------|-------------|-----------------|
| XM_004006767.3 | -1.306118245 | 0.12732052  | Under expressed |
| XM_015098467.2 | -1.30596999  | 0.001851564 | Under expressed |
| XM_015099893.2 | -1.305332957 | 0.093582539 | Under expressed |
| XM_012186164.3 | -1.305252298 | 2.87E-05    | Under expressed |
| XM_004012734.3 | -1.304942843 | 0.097574786 | Under expressed |
| XM_012185299.3 | -1.303653992 | 0.001205515 | Under expressed |
| XM_004003083.4 | -1.303483348 | 0.148077401 | Under expressed |
| XM_004012425.4 | -1.303423682 | 0.111567921 | Under expressed |
| XM_012175114.3 | -1.302157713 | 0.133008254 | Under expressed |
| XM_004023151.4 | -1.302002246 | 0.022349694 | Under expressed |
| XM_012179809.3 | -1.300732486 | 0.069076556 | Under expressed |
| XM_004017531.4 | -1.29997366  | 0.139532612 | Under expressed |
| XM_004011844.3 | -1.299862751 | 0.001559245 | Under expressed |
| XM_027969060.1 | -1.299294541 | 0.030579045 | Under expressed |
| XM_027975119.1 | -1.299254041 | 0.117579365 | Under expressed |
| XM_004011168.4 | -1.297571276 | 0.115180028 | Under expressed |
| XM_004002085.4 | -1.296890718 | 0.00527025  | Under expressed |
| XM_015095971.2 | -1.295438389 | 0.123894856 | Under expressed |
| XM_004003027.4 | -1.295027145 | 0.08091314  | Under expressed |
| XM_027971326.1 | -1.295006995 | 0.061431822 | Under expressed |
| XM_027964117.1 | -1.294270988 | 0.080820671 | Under expressed |
| XM_027980025.1 | -1.294082849 | 0.075660032 | Under expressed |
| XM_012106241.3 | -1.29361731  | 0.038793587 | Under expressed |
| XM_027976294.1 | -1.293164941 | 0.000335014 | Under expressed |
| XM_027972926.1 | -1.292983174 | 0.061886192 | Under expressed |
| XM_015103787.2 | -1.292199201 | 0.000780441 | Under expressed |
| XM_027978917.1 | -1.29119207  | 0.055777282 | Under expressed |
| XM_027973696.1 | -1.290204673 | 0.047872437 | Under expressed |
| XM_015091597.2 | -1.289445787 | 0.037413702 | Under expressed |
| XM_027976983.1 | -1.28849053  | 0.050209353 | Under expressed |
| XM_027956731.1 | -1.287850038 | 7.65E-07    | Under expressed |
| XM_015096790.2 | -1.286586792 | 5.89E-06    | Under expressed |
| XM_004002381.4 | -1.285652541 | 0.10711526  | Under expressed |
| XM_004020157.4 | -1.285062389 | 0.000199263 | Under expressed |
| XM_004020428.4 | -1.2839376   | 0.049857534 | Under expressed |
| XM_004018847.3 | -1.283708453 | 0.125601875 | Under expressed |
| XR_173257.4    | -1.282229646 | 0.081046239 | Under expressed |
| XM_004002942.4 | -1.280512619 | 8.35E-08    | Under expressed |
| XM_027980246.1 | -1.280342161 | 0.107687738 | Under expressed |
| XM_027975186.1 | -1.280308613 | 0.040091516 | Under expressed |
| XM_004020255.3 | -1.280134388 | 0.037325588 | Under expressed |
| XR_001023051.2 | -1.27999903  | 0.005728053 | Under expressed |
| XM_027964046.1 | -1.279827681 | 0.114830617 | Under expressed |
| XM_012177637.2 | -1.279683257 | 0.086422197 | Under expressed |

|                |              |             |                 |
|----------------|--------------|-------------|-----------------|
| XM_004008227.4 | -1.278721925 | 0.015738733 | Under expressed |
| XM_004020199.4 | -1.277928123 | 0.133471132 | Under expressed |
| XM_004002063.3 | -1.277849082 | 0.099010274 | Under expressed |
| XM_004013176.4 | -1.277185027 | 0.010662357 | Under expressed |
| XM_015094386.2 | -1.275667691 | 0.011159308 | Under expressed |
| XM_004006512.4 | -1.275599556 | 0.008792602 | Under expressed |
| XM_027970992.1 | -1.275578493 | 0.011322098 | Under expressed |
| XM_004010517.4 | -1.274150869 | 0.017793199 | Under expressed |
| XM_015096436.2 | -1.271643927 | 0.091811836 | Under expressed |
| XR_003591055.1 | -1.271066382 | 0.077638884 | Under expressed |
| XM_012106423.3 | -1.270258738 | 0.098471359 | Under expressed |
| XM_004002962.4 | -1.270088781 | 0.022303457 | Under expressed |
| XM_012099396.3 | -1.268626314 | 0.000575088 | Under expressed |
| XM_004002359.4 | -1.268263249 | 0.083747551 | Under expressed |
| XM_004009795.4 | -1.265618116 | 0.0271568   | Under expressed |
| XM_027970255.1 | -1.26522502  | 0.026868418 | Under expressed |
| XM_027974270.1 | -1.264151703 | 0.115180028 | Under expressed |
| XM_027966886.1 | -1.261612595 | 0.037297127 | Under expressed |
| XM_004017222.3 | -1.259721285 | 0.075075778 | Under expressed |
| XM_015102015.2 | -1.254979356 | 0.027637143 | Under expressed |
| XM_027962360.1 | -1.254885823 | 0.044901775 | Under expressed |
| XM_027973879.1 | -1.25261631  | 0.036086358 | Under expressed |
| XM_027979603.1 | -1.252447758 | 0.068576147 | Under expressed |
| XM_027971892.1 | -1.252085435 | 0.010237078 | Under expressed |
| XR_003589400.1 | -1.250579628 | 0.144032633 | Under expressed |
| XM_004016582.4 | -1.248118305 | 0.000409787 | Under expressed |
| XM_027966437.1 | -1.248032924 | 0.013657581 | Under expressed |
| XM_015103563.2 | -1.247805857 | 0.129315715 | Under expressed |
| XM_027958963.1 | -1.247777723 | 0.146066494 | Under expressed |
| XM_015098684.2 | -1.246775068 | 0.122098693 | Under expressed |
| XM_004004770.4 | -1.24634476  | 0.077117892 | Under expressed |
| XM_004009714.4 | -1.246006177 | 0.009636818 | Under expressed |
| XM_004016917.4 | -1.245581371 | 0.108179611 | Under expressed |
| NM_001009761.1 | -1.244482356 | 6.12E-06    | Under expressed |
| XM_012102945.3 | -1.243145555 | 0.076823792 | Under expressed |
| XM_004016888.3 | -1.243015691 | 4.00E-05    | Under expressed |
| XM_012185167.3 | -1.24293113  | 0.034780821 | Under expressed |
| XR_003586699.1 | -1.242383592 | 0.02431223  | Under expressed |
| XM_004014257.4 | -1.241013133 | 0.099487685 | Under expressed |
| XM_004016034.4 | -1.240397439 | 0.030661225 | Under expressed |
| XM_004016952.4 | -1.240247815 | 0.117748156 | Under expressed |
| XM_004011067.4 | -1.239555098 | 0.001055116 | Under expressed |
| XM_004002540.4 | -1.238607627 | 0.124072705 | Under expressed |
| XR_003588622.1 | -1.238422156 | 0.064891664 | Under expressed |

|                |              |             |                 |
|----------------|--------------|-------------|-----------------|
| XM_004010748.4 | -1.237996102 | 0.037073994 | Under expressed |
| XM_012178899.3 | -1.237114673 | 0.022102665 | Under expressed |
| XM_004019444.4 | -1.237023724 | 0.033198502 | Under expressed |
| XR_003586287.1 | -1.235923972 | 0.040249175 | Under expressed |
| XM_012175577.2 | -1.234448856 | 0.055980039 | Under expressed |
| XM_027960198.1 | -1.234314575 | 0.044299126 | Under expressed |
| XM_004021749.4 | -1.233995632 | 0.05329855  | Under expressed |
| XM_004006009.3 | -1.233975666 | 0.024378514 | Under expressed |
| XM_004020787.4 | -1.231940261 | 0.030212212 | Under expressed |
| XM_004014553.4 | -1.231556843 | 0.09363129  | Under expressed |
| XM_004004357.3 | -1.231367478 | 0.008154444 | Under expressed |
| XM_004002414.3 | -1.230175311 | 0.123713244 | Under expressed |
| XM_012186433.3 | -1.228806821 | 0.037222165 | Under expressed |
| XM_027960634.1 | -1.228520378 | 0.001221596 | Under expressed |
| XM_027971654.1 | -1.227892752 | 0.017715929 | Under expressed |
| XM_012097773.3 | -1.227053516 | 0.114194937 | Under expressed |
| XM_012122011.3 | -1.226112089 | 0.059926809 | Under expressed |
| XM_027974337.1 | -1.225999618 | 0.03049649  | Under expressed |
| XM_004003013.4 | -1.225742905 | 0.140691344 | Under expressed |
| XM_027978733.1 | -1.225476024 | 0.090040828 | Under expressed |
| XM_004015478.4 | -1.225270578 | 0.081046239 | Under expressed |
| XM_027968227.1 | -1.223694235 | 0.011979828 | Under expressed |
| XM_027968908.1 | -1.223212591 | 0.048195485 | Under expressed |
| XM_012099990.3 | -1.222166277 | 0.017516677 | Under expressed |
| XM_012105183.3 | -1.220586136 | 0.109135099 | Under expressed |
| XM_004001948.3 | -1.219650767 | 0.135482323 | Under expressed |
| XM_012184609.3 | -1.218919315 | 0.114734629 | Under expressed |
| XM_004004697.4 | -1.218804504 | 0.011605044 | Under expressed |
| XM_027956643.1 | -1.216714309 | 0.08471501  | Under expressed |
| XM_027969057.1 | -1.214849696 | 1.38E-07    | Under expressed |
| XM_027971787.1 | -1.213523883 | 0.012213552 | Under expressed |
| XM_027962723.1 | -1.210613521 | 0.116339591 | Under expressed |
| XM_004011170.3 | -1.206873263 | 0.149516883 | Under expressed |
| XM_015095742.2 | -1.206284124 | 0.016091368 | Under expressed |
| XM_027971956.1 | -1.205398934 | 0.114734629 | Under expressed |
| XM_004015004.4 | -1.204328293 | 0.004243744 | Under expressed |
| XM_012186252.3 | -1.204240122 | 0.087572253 | Under expressed |
| XM_012099374.3 | -1.20047067  | 0.077188914 | Under expressed |
| XM_027977894.1 | -1.200437035 | 0.071666557 | Under expressed |
| XM_004005076.4 | -1.196631822 | 0.075382461 | Under expressed |
| XM_004010602.4 | -1.196608844 | 0.005587828 | Under expressed |
| XM_027957375.1 | -1.196573907 | 0.13799039  | Under expressed |
| XM_027962513.1 | -1.195170792 | 0.00681404  | Under expressed |
| XM_004010512.4 | -1.19469207  | 0.024193999 | Under expressed |

|                |              |             |                 |
|----------------|--------------|-------------|-----------------|
| XM_027967749.1 | -1.190692634 | 0.032525901 | Under expressed |
| NM_001009762.1 | -1.1905331   | 0.088837651 | Under expressed |
| XM_027964810.1 | -1.190346671 | 0.063723527 | Under expressed |
| XM_027956509.1 | -1.186589229 | 0.116339591 | Under expressed |
| XM_004005581.4 | -1.186439144 | 0.020335664 | Under expressed |
| XM_027956423.1 | -1.182396743 | 0.103299359 | Under expressed |
| XM_027966511.1 | -1.181162189 | 0.128334757 | Under expressed |
| XM_004006737.4 | -1.178135441 | 0.033115292 | Under expressed |
| NM_001348418.1 | -1.177923727 | 0.006940337 | Under expressed |
| XR_003591330.1 | -1.176495429 | 0.103299359 | Under expressed |
| XM_004019116.4 | -1.176109378 | 0.097203793 | Under expressed |
| XM_004020785.3 | -1.175565408 | 0.012064496 | Under expressed |
| XM_027977385.1 | -1.173791128 | 0.000496173 | Under expressed |
| XM_027967139.1 | -1.173694053 | 0.027418944 | Under expressed |
| XM_004003376.4 | -1.171948935 | 0.044694607 | Under expressed |
| XR_173202.4    | -1.171003044 | 0.14474187  | Under expressed |
| XM_027968858.1 | -1.167967081 | 0.004243744 | Under expressed |
| XR_003588218.1 | -1.167492075 | 0.093913245 | Under expressed |
| XM_027962606.1 | -1.167461138 | 0.051378708 | Under expressed |
| XM_004017911.4 | -1.16703165  | 0.000331114 | Under expressed |
| XM_004020062.4 | -1.16675067  | 0.062740582 | Under expressed |
| NM_001009234.1 | -1.166478104 | 0.091353862 | Under expressed |
| XM_004009920.3 | -1.165443014 | 0.078734247 | Under expressed |
| XM_012156222.3 | -1.164673267 | 0.023894404 | Under expressed |
| XM_004003300.4 | -1.163896809 | 0.092859698 | Under expressed |
| XM_027965566.1 | -1.160975352 | 0.06162607  | Under expressed |
| XM_004011662.3 | -1.160672858 | 0.00266463  | Under expressed |
| XM_012113497.3 | -1.158890033 | 0.102647913 | Under expressed |
| XM_004022279.4 | -1.158362009 | 0.093862844 | Under expressed |
| XM_004005671.3 | -1.157802883 | 0.038433366 | Under expressed |
| XM_004002431.4 | -1.155802988 | 0.050774793 | Under expressed |
| XM_004005014.4 | -1.155159835 | 0.028801284 | Under expressed |
| XM_015099542.2 | -1.153136789 | 0.043089562 | Under expressed |
| XM_004003221.4 | -1.152767897 | 0.067316641 | Under expressed |
| XM_004005698.4 | -1.15195167  | 0.019705513 | Under expressed |
| XM_012100619.3 | -1.150722846 | 0.000209242 | Under expressed |
| XM_015101910.2 | -1.150333804 | 0.022722064 | Under expressed |
| XM_012183714.3 | -1.150156454 | 0.012910881 | Under expressed |
| XM_004002714.3 | -1.149501476 | 0.083679115 | Under expressed |
| XM_015095297.2 | -1.148330224 | 0.125571928 | Under expressed |
| XM_027959693.1 | -1.148119363 | 0.114276131 | Under expressed |
| XM_004013369.4 | -1.145507173 | 0.11382484  | Under expressed |
| XM_015092295.2 | -1.14544851  | 0.108417189 | Under expressed |
| XM_004001995.4 | -1.142591938 | 0.052236032 | Under expressed |

|                |              |             |                 |
|----------------|--------------|-------------|-----------------|
| XM_027979164.1 | -1.140773631 | 0.01795119  | Under expressed |
| XM_012126676.3 | -1.140449588 | 0.004848344 | Under expressed |
| XM_004002260.4 | -1.139987859 | 0.005882631 | Under expressed |
| XM_027960952.1 | -1.139510869 | 0.006164355 | Under expressed |
| XR_003587162.1 | -1.1393971   | 0.055900731 | Under expressed |
| XM_004021456.4 | -1.139067413 | 0.039974695 | Under expressed |
| XM_027980116.1 | -1.138952788 | 4.94E-05    | Under expressed |
| XM_004008987.3 | -1.138943288 | 0.144983001 | Under expressed |
| XM_015099798.2 | -1.138689678 | 0.139090988 | Under expressed |
| XM_027956500.1 | -1.138322811 | 0.012910881 | Under expressed |
| XM_027956650.1 | -1.138297939 | 9.18E-05    | Under expressed |
| XM_027965717.1 | -1.137956678 | 0.022102665 | Under expressed |
| XM_012190289.3 | -1.136208372 | 0.020511643 | Under expressed |
| XM_004017910.3 | -1.136105534 | 6.07E-09    | Under expressed |
| XM_012148762.3 | -1.135457597 | 0.110611857 | Under expressed |
| XM_027968900.1 | -1.135451112 | 0.033102655 | Under expressed |
| XM_004002248.4 | -1.135103013 | 0.025194359 | Under expressed |
| XR_003587037.1 | -1.134454523 | 0.0143192   | Under expressed |
| XM_015092353.2 | -1.132498633 | 1.25E-11    | Under expressed |
| XM_004002382.3 | -1.131599347 | 0.064507539 | Under expressed |
| XM_027960457.1 | -1.131586854 | 0.115642766 | Under expressed |
| XR_001042197.2 | -1.130765915 | 0.078081541 | Under expressed |
| XM_004010368.4 | -1.130457923 | 0.100241732 | Under expressed |
| XM_004020433.4 | -1.129500408 | 0.008768154 | Under expressed |
| XM_027959114.1 | -1.128398675 | 0.028236976 | Under expressed |
| XM_004005910.4 | -1.128148288 | 0.009713468 | Under expressed |
| XM_004005912.4 | -1.126863013 | 0.034465591 | Under expressed |
| XM_004016124.4 | -1.126503057 | 0.070664191 | Under expressed |
| XM_015093251.2 | -1.125958371 | 0.003013092 | Under expressed |
| XR_003586278.1 | -1.125613543 | 0.098301605 | Under expressed |
| XM_027961544.1 | -1.124872763 | 0.013093738 | Under expressed |
| XM_015096234.2 | -1.124753357 | 0.025890047 | Under expressed |
| XM_015093602.2 | -1.121411002 | 0.011082114 | Under expressed |
| XM_004002270.3 | -1.120282892 | 0.074207643 | Under expressed |
| XM_027979637.1 | -1.11621778  | 0.066753208 | Under expressed |
| XM_027979801.1 | -1.11595611  | 0.060408811 | Under expressed |
| XM_012182734.3 | -1.115459467 | 0.001797027 | Under expressed |
| XM_027963624.1 | -1.115198521 | 0.093128719 | Under expressed |
| XM_012181995.2 | -1.114322086 | 0.030956278 | Under expressed |
| XM_004001795.4 | -1.114215556 | 0.0055037   | Under expressed |
| XM_027957304.1 | -1.112763514 | 0.023300113 | Under expressed |
| XM_027972953.1 | -1.110385746 | 0.113125338 | Under expressed |
| XM_004004598.3 | -1.108563199 | 0.125641401 | Under expressed |
| XM_004017947.4 | -1.108381316 | 3.76E-06    | Under expressed |



|                |              |             |                 |
|----------------|--------------|-------------|-----------------|
| NM_001161864.1 | -1.107994747 | 0.076846861 | Under expressed |
| NM_001146090.1 | -1.107534751 | 0.097670933 | Under expressed |
| XM_004017834.4 | -1.107179801 | 0.049224045 | Under expressed |
| XM_027967991.1 | -1.104286888 | 0.135058947 | Under expressed |
| XM_004012527.3 | -1.103825118 | 0.010922841 | Under expressed |
| XM_004004498.4 | -1.103241119 | 0.000243028 | Under expressed |
| XM_027973654.1 | -1.102600994 | 0.084518502 | Under expressed |
| XM_015098276.2 | -1.100816152 | 0.003430047 | Under expressed |
| NM_001009426.1 | -1.099925013 | 0.142676804 | Under expressed |
| XM_004011785.3 | -1.099572836 | 0.084518502 | Under expressed |
| XM_004002396.4 | -1.099286361 | 0.139019656 | Under expressed |
| XM_015099185.2 | -1.099208841 | 0.123224974 | Under expressed |
| XM_027971133.1 | -1.097028927 | 0.074993762 | Under expressed |
| XM_015096684.2 | -1.096713273 | 0.003904494 | Under expressed |
| XM_004006704.4 | -1.096450226 | 0.121459753 | Under expressed |
| XM_015095384.2 | -1.095686344 | 0.006164355 | Under expressed |
| XM_015099649.2 | -1.095439161 | 0.004326465 | Under expressed |
| XM_012116077.2 | -1.095289499 | 0.092441509 | Under expressed |
| XM_012105143.3 | -1.095283275 | 0.031948203 | Under expressed |
| XM_027970004.1 | -1.094376659 | 0.084883641 | Under expressed |
| XM_015102267.2 | -1.092360665 | 0.011966257 | Under expressed |
| XM_027971070.1 | -1.092078516 | 0.0484073   | Under expressed |
| XM_004002410.4 | -1.092050193 | 0.002207834 | Under expressed |
| XR_003591421.1 | -1.091157052 | 0.083066409 | Under expressed |
| XR_003591329.1 | -1.088982294 | 0.099181007 | Under expressed |
| NM_001009402.2 | -1.08699029  | 0.000814822 | Under expressed |
| XM_004002172.4 | -1.086795105 | 0.022452826 | Under expressed |
| XM_004019415.4 | -1.086396413 | 0.020188871 | Under expressed |
| XM_012094886.3 | -1.085319488 | 0.030471718 | Under expressed |
| XM_004006770.4 | -1.084470815 | 0.139337763 | Under expressed |
| XM_027956305.1 | -1.083909342 | 0.03077649  | Under expressed |
| XM_027980128.1 | -1.083620985 | 0.002558817 | Under expressed |
| XM_015096913.2 | -1.083504451 | 0.007275229 | Under expressed |
| XM_027966883.1 | -1.082677886 | 0.051076808 | Under expressed |
| XM_004019417.4 | -1.081911089 | 0.072328652 | Under expressed |
| XM_027968873.1 | -1.081202834 | 0.069441481 | Under expressed |
| XM_004003185.4 | -1.078756488 | 0.053866104 | Under expressed |
| XM_012100410.2 | -1.078032656 | 0.128230622 | Under expressed |
| XR_003589869.1 | -1.077697677 | 0.008154444 | Under expressed |
| XM_027974810.1 | -1.077625195 | 0.006805076 | Under expressed |
| XM_027973627.1 | -1.075977677 | 0.04821245  | Under expressed |
| XM_004013683.4 | -1.075419413 | 0.013130177 | Under expressed |
| XM_004002061.3 | -1.075192791 | 0.059926809 | Under expressed |
| XM_004019550.4 | -1.075049516 | 0.073189527 | Under expressed |

|                |              |             |                 |
|----------------|--------------|-------------|-----------------|
| XM_027962224.1 | -1.074967423 | 0.113547427 | Under expressed |
| XM_012173447.2 | -1.073621368 | 0.103938512 | Under expressed |
| XM_015099354.2 | -1.073603942 | 0.115757473 | Under expressed |
| XM_012104929.3 | -1.072625024 | 0.119499116 | Under expressed |
| XM_027978037.1 | -1.071233053 | 0.133956634 | Under expressed |
| XM_012097501.3 | -1.071215748 | 0.148300609 | Under expressed |
| XM_004011164.4 | -1.069072915 | 0.014635662 | Under expressed |
| XM_027970054.1 | -1.069066626 | 0.035066574 | Under expressed |
| XM_004010821.3 | -1.067792274 | 0.033842741 | Under expressed |
| XM_004012055.4 | -1.066929588 | 0.113919174 | Under expressed |
| XM_004005974.4 | -1.06180992  | 0.066615017 | Under expressed |
| XM_012189881.2 | -1.058038704 | 0.059518391 | Under expressed |
| XM_027978674.1 | -1.057821774 | 0.138021514 | Under expressed |
| XM_027962725.1 | -1.057695573 | 0.147632137 | Under expressed |
| XM_004010601.4 | -1.056006443 | 0.035136979 | Under expressed |
| XR_003590230.1 | -1.055737997 | 0.055378271 | Under expressed |
| XM_012184734.3 | -1.052856852 | 0.012639426 | Under expressed |
| XM_012099024.3 | -1.050810956 | 5.45E-05    | Under expressed |
| XM_015097083.2 | -1.049296421 | 0.127642024 | Under expressed |
| XM_004023448.4 | -1.047925668 | 0.020033532 | Under expressed |
| XM_012184994.2 | -1.045032751 | 0.096889668 | Under expressed |
| XM_004011624.4 | -1.04434225  | 0.05053463  | Under expressed |
| XM_027970252.1 | -1.044232402 | 0.030324471 | Under expressed |
| XM_004007950.3 | -1.042810721 | 0.025342248 | Under expressed |
| XM_012189330.3 | -1.041653    | 0.078748788 | Under expressed |
| XM_004021795.4 | -1.040675577 | 0.128213235 | Under expressed |
| XM_004016010.4 | -1.039944716 | 0.116472266 | Under expressed |
| XM_027956263.1 | -1.038123312 | 0.107604656 | Under expressed |
| XM_004012545.4 | -1.036121152 | 0.107697796 | Under expressed |
| XM_027974336.1 | -1.03357379  | 0.089987196 | Under expressed |
| XM_027973259.1 | -1.032935977 | 0.050774793 | Under expressed |
| XM_027956447.1 | -1.029055617 | 0.050303212 | Under expressed |
| XM_027974389.1 | -1.026032191 | 0.087521082 | Under expressed |
| XM_015103086.2 | -1.024686801 | 0.104824887 | Under expressed |
| XM_027970055.1 | -1.023743393 | 0.05435183  | Under expressed |
| XM_004013554.4 | -1.022718077 | 0.036187875 | Under expressed |
| XM_015100431.2 | -1.021787978 | 0.064934657 | Under expressed |
| XM_027962872.1 | -1.019622124 | 0.145314929 | Under expressed |
| XM_027966699.1 | -1.019291333 | 0.036039011 | Under expressed |
| XM_012094697.3 | -1.018128467 | 0.057922548 | Under expressed |
| XM_004012582.3 | -1.017770826 | 0.007928898 | Under expressed |
| XM_004019432.4 | -1.01725792  | 0.006384888 | Under expressed |
| XM_004005781.3 | -1.016949974 | 0.086106863 | Under expressed |
| XM_027960230.1 | -1.01412253  | 0.066419921 | Under expressed |

|                |              |             |                 |
|----------------|--------------|-------------|-----------------|
| XM_012180676.3 | -1.013331982 | 0.116394995 | Under expressed |
| XM_027976331.1 | -1.010681025 | 0.00439289  | Under expressed |
| XM_027971454.1 | -1.008805113 | 0.126277833 | Under expressed |
| XM_015098787.2 | -1.00865079  | 0.050315067 | Under expressed |
| XM_012101804.3 | -1.00803371  | 0.101186784 | Under expressed |
| XM_027972143.1 | -1.007565524 | 0.139532612 | Under expressed |
| XM_004009064.3 | -1.006992937 | 0.118464172 | Under expressed |
| XM_027978447.1 | -1.006530034 | 0.106958846 | Under expressed |
| XM_012100702.3 | -1.00588144  | 0.08081515  | Under expressed |
| XM_012106769.3 | -1.005853739 | 0.051417105 | Under expressed |
| XM_027978869.1 | -1.005527979 | 0.090878837 | Under expressed |
| XM_027969068.1 | -1.004930675 | 0.07218715  | Under expressed |
| XM_015102846.2 | -1.004686024 | 0.139058712 | Under expressed |
| XM_027969667.1 | -1.004553911 | 0.027450496 | Under expressed |
| XM_004002909.4 | -1.000797992 | 0.114827141 | Under expressed |

---

**Table S4.** List of differentially expressed genes splitted per KEGG metabolic pathway.

| Kegg-code                      | Pathway                                     | Over-expressed                                                                                                                                                                                                                                                                                                                                                                         | Under-expressed                                                                                                                            |
|--------------------------------|---------------------------------------------|----------------------------------------------------------------------------------------------------------------------------------------------------------------------------------------------------------------------------------------------------------------------------------------------------------------------------------------------------------------------------------------|--------------------------------------------------------------------------------------------------------------------------------------------|
| <b>Carbohydrate metabolism</b> |                                             |                                                                                                                                                                                                                                                                                                                                                                                        |                                                                                                                                            |
| oas00520                       | Amino sugar and nucleotide sugar metabolism | HEXA;GMDS;NAGK;PMM1;NANS;NADH-cytochrome b5 reductase 3 isoform X3RENBP;MPI;NADH-cytochrome b5 reductase 1beta-hexosaminidase subunit beta-like isoform X1TSTA3;FUK;AMDHD2;GMPPA;GALK1;GALT                                                                                                                                                                                            | cytidine monophosphate-N-acetylneuraminic acid hydroxylase isoform X1;UAP1;GNE;PGM2;PGM3;GNPNAT1;UGP2;GFPT1;cytochrome b5 reductase 4;FPGT |
| oas00051                       | Fructose and mannose metabolism             | GMDS;PMM1;ALDOC;TKFC;MPI;TPI1;KHK;TSTA3;FUK;SORD;GMPPA;ALDOA;PFKL                                                                                                                                                                                                                                                                                                                      | FPGT                                                                                                                                       |
| oas00052                       | Galactose metabolism                        | G6PC3;GALK1;GALT;PFKL                                                                                                                                                                                                                                                                                                                                                                  | B4GALT1;PGM2;UGP2                                                                                                                          |
| oas00010                       | Glycolysis and gluconeogenesis              | ALDOC;TPI1;PARP6;aldehyde dehydrogenase family 3 member B1 isoform X1;ALDH3B1;G6PC3;AKR1A1;ALDOA;LDHA;PFKL                                                                                                                                                                                                                                                                             | PGM2                                                                                                                                       |
| oas00030                       | Pentose phosphate pathway                   | ALDOC;PGLS;GLYCTK;ALDOA;PFKL                                                                                                                                                                                                                                                                                                                                                           | deoxyribose-phosphate aldolase;RPIA;PGM2                                                                                                   |
| oas00620                       | Pyruvate metabolism                         | FH;PARP6;LDHD;LDHA;MDH2                                                                                                                                                                                                                                                                                                                                                                | ACAT1;GRHPR                                                                                                                                |
| oas00640                       | Propanoate metabolism                       | BCKDHA;ECHS1;SUCLG1;LDHA                                                                                                                                                                                                                                                                                                                                                               | ACAT1;ALDH6A1;HIBCH                                                                                                                        |
| oas00020                       | TCA cycle                                   | FH;SDHB;IDH3G;SUCLG1;MDH2                                                                                                                                                                                                                                                                                                                                                              | ACLY                                                                                                                                       |
| <b>Energy metabolism</b>       |                                             |                                                                                                                                                                                                                                                                                                                                                                                        |                                                                                                                                            |
| oas00190                       | Oxidative phosphorylation                   | NDUFA7;NDUFA3;LHPP;PPA2;NDUFA13;cytochrome c oxidase subunit 4 isoform 1, mitochondrial;ATP6V1B1;SDHB;cytochrome b-c1 complex subunit 1, mitochondrial;cytochrome c oxidase subunit 5B, mitochondrial;ATP5ME;NDUFB10;ATP6V1F;NDUFS8;TCIRG1;cytochrome c1, heme protein, mitochondrial;NDUFS7;ATP5F1D;NDUFB11;cytochrome b-c1 complex subunit 10;NDUFV1;NDUFB7;NDUFA10;ATP6V0A1;ATP5MC1 | ATP6V1A;PPA1                                                                                                                               |
| oas00920                       | Sulfur metabolism                           | TST;MPST                                                                                                                                                                                                                                                                                                                                                                               | IMPAD1                                                                                                                                     |
| <b>Lipid metabolism</b>        |                                             |                                                                                                                                                                                                                                                                                                                                                                                        |                                                                                                                                            |
| oas01040                       | Biosynthesis of unsaturated fatty acid      | ACAA1                                                                                                                                                                                                                                                                                                                                                                                  | ELOVL5;ELOVL1;SCD                                                                                                                          |
| oas00062                       | Fatty acid elongation                       | ECHS1;MECR                                                                                                                                                                                                                                                                                                                                                                             | ELOVL5;ELOVL6                                                                                                                              |
| oas00071                       | Fatty acid degradation                      | ACSL6;ACAA1;ECHS1;ECI1;ECI2;CPT1B                                                                                                                                                                                                                                                                                                                                                      | ACAT1;CPT2;ACSL5                                                                                                                           |

|                              |                                             |                                                                                                                                                                |                                                                                                            |
|------------------------------|---------------------------------------------|----------------------------------------------------------------------------------------------------------------------------------------------------------------|------------------------------------------------------------------------------------------------------------|
| oas00140                     | Steroid biosynthesis                        | CYP2D6;TOMT;HSD17B1;HSD17B8;SULT2B1                                                                                                                            | HSD17B7;HSD11B1                                                                                            |
| oas00561                     | Glycerolipid metabolism                     | TKFC;LPIN3;GLYCTK;AGPAT2;LIPC;GPAT4;AKR1A1;AGPAT1                                                                                                              | DGKE;AGPAT1;LPL                                                                                            |
| oas00564                     | Glycerophospholipid metabolism              | PLD4;LPIN3;PTDSS2;MBOAT7;TAZ;CHPT1;LPCAT1;PEMT;PGS1;PCYT2;AGPAT2;GPAT4;PLD3;CHKB;CDIPT;AGPAT1                                                                  | SELENOI;CEPT1;ETNK1;GPCPD1;LPCAT2;PLA2G12A;DGKE;AGPAT1                                                     |
| oas00565                     | Ether lipid metabolism                      | PAFAH1B3;PLD4;CHPT1;LPCAT1;PAFAH1B2;PLD3                                                                                                                       | AGPS;SELENOI;CEPT1;LPCAT2;PLA2G12A;PLA2G7                                                                  |
| oas00600                     | Sphingolipid metabolism                     | SMPD1;SPHK1;SMPD2;GBA;ARSA                                                                                                                                     | SPHK2;SGPL1;UGCG;SGMS1                                                                                     |
| oas00590                     | Arachidonic metabolism                      | GPX1;PTGES2;ALOX12;carbonyl reductase [NADPH] 3;PRXL2B;arachidonate 15-lipoxygenase B                                                                          | ALOX15;PLA2G12A;LTA4H;PTGS2                                                                                |
| <b>Nucleotide metabolism</b> |                                             |                                                                                                                                                                |                                                                                                            |
| oas00230                     | Purine metabolism                           | AK1;IMPDH1;HDDC3;APRT;5-hydroxyisourate hydrolase-like isoform X2;NT5C3B;NME4;PARP6;AK8;uncharacterized protein LOC101117419 isoform X1;ITPA;GUK1;NUDT2;NUDT16 | AMPD3;PDE4D;NT5C2;PGM2;AK3;ENPP4;PDE7A;ADK;RRM2B                                                           |
| oas00240                     | Pyrimidine metabolism                       | DHODH;NT5C3B;NME4;DUT;DTYMK;DCTPP1;NUDT2                                                                                                                       | CMPK1;DPYD;NT5C2;RRM2B                                                                                     |
| <b>Amino acid metabolism</b> |                                             |                                                                                                                                                                |                                                                                                            |
| oas00250                     | Alanine, aspartate and glutamate metabolism | ASL                                                                                                                                                            | L-amino-acid oxidase-like;DDO;GFPT1;GLS                                                                    |
| oas00260                     | Glycine, serine and threonine metabolism    | GLYCTK;SDSL;GAMT                                                                                                                                               | GRHPR;serine racemase isoform X1;CTH                                                                       |
| oas00270                     | Cysteine and methionine metabolism          | DNMT3A;TST;MPST;SDSL;ENOPH1;LDHA;MDH2                                                                                                                          | L-amino-acid oxidase-like;MTAP;AHCYL1;AMD1;AHCYL2;GCLM;CTH;MAT2B                                           |
| oas00280                     | Valine leucine and isoleucine metabolism    | BCKDHA;ACAA1;ECHS1;HSD17B10                                                                                                                                    | L-amino-acid oxidase-like;ACAT1;ALDH6A1;HIBCH;MCCC2;HMGCS1                                                 |
| oas00310                     | Lysine degradation                          | PLOD1;ECHS1;COLGALT1;DOT1L                                                                                                                                     | ACAT1;SETDB1;histone-lysine N-methyltransferase KMT5B-like;NSD3;SETD2;CAMKMT;SUV39H2;ASH1L;EZH2;NSD1;PRDM2 |

|                                          |                                           |                                                                                                                         |                                                                                                                                                                                                                         |
|------------------------------------------|-------------------------------------------|-------------------------------------------------------------------------------------------------------------------------|-------------------------------------------------------------------------------------------------------------------------------------------------------------------------------------------------------------------------|
| oas00330                                 | Arginine and proline metabolism           | SAT2;proline dehydrogenase 1, mitochondrial isoform X1;CNDP2;GAMT;PYCR3;prolyl 4-hydroxylase subunit alpha-2 isoform X1 | AMD1;SAT1;OAT;SMOX;prolyl 4-hydroxylase subunit alpha-2 isoform X1                                                                                                                                                      |
| oas00340                                 | Histidine metabolism                      | CNDP2;aldehyde dehydrogenase family 3 member B1 isoform X1;ALDH3B1                                                      | CARNMT1                                                                                                                                                                                                                 |
| oas00350                                 | Tyrosine metabolism                       | TOMT;FAH;aldehyde dehydrogenase family 3 member B1 isoform X1;ALDH3B1;FAHD1;MIF                                         | L-amino-acid oxidase-like                                                                                                                                                                                               |
| oas00480                                 | Glutathione metabolism                    | GPX1;glutathione S-transferase Mu 1;GPX4;GSTP1                                                                          | GCLM;RRM2B                                                                                                                                                                                                              |
| <b>Glycan metabolism</b>                 |                                           |                                                                                                                         |                                                                                                                                                                                                                         |
| oas00510                                 | N-glycan biosynthesis                     | ALG5;ALG12;DOLK;ALG3;DPM2                                                                                               | B4GALT1;ALG2;B4GALT3;dol-P-Glc:Glc(2)Man(9)GlcNAc(2)-PP-Dol alpha-1,2-glucosyltransferase;MAN1A2;ALG6;MGAT4A;putative bifunctional UDP-N-acetylglucosamine transferase and deubiquitinase ALG13 isoform X1;MAN2A1;MGAT3 |
| oas00514                                 | Other types O-glycan biosynthesis         | RFNG;ST3GAL3;COLGALT1;POMT1                                                                                             | B4GALT1;B4GALT3;OGT;EOGT                                                                                                                                                                                                |
| oas00531                                 | Glycosaminoglycans degradation            | HEXA;NAGLU;IDUA;beta-hexosaminidase subunit beta-like isoform X1;SGSH                                                   |                                                                                                                                                                                                                         |
| oas00532                                 | Glycosaminoglycans biosynthesis           | B4GALT7;B3GAT3                                                                                                          | XYLT1;CSGALNACT1                                                                                                                                                                                                        |
| oas00563                                 | Glycosylphosphatidylinositol biosynthesis | PIGQ;GPAA1;PIGL;PIGU;DPM2                                                                                               | PIGA;PGAP1                                                                                                                                                                                                              |
| oas00601                                 | Glycosphingolipids metabolism             | ST3GAL6;ST3GAL3                                                                                                         | ST3GAL4;B4GALT1;B4GALT3;N-acetyllactosaminide beta-1,6-N-acetylglucosaminyl-transferase isoform X2;ST3GAL6                                                                                                              |
| <b>Vitamins and cofactors metabolism</b> |                                           |                                                                                                                         |                                                                                                                                                                                                                         |
| oas00740                                 | Riboflavin metabolism                     | ACP5;FLAD1;BLVRB                                                                                                        | RFK; ACP1                                                                                                                                                                                                               |
| oas00750                                 | Vitamin B6 metabolism                     | PDXK                                                                                                                    |                                                                                                                                                                                                                         |
| oas00760                                 | Nicotinate and nicotinamide metabolism    | NT5C3B;NAPRT;NMNAT1;BST1                                                                                                | NMNAT3;NT5C2;NUDT12;NADK2;NMRK1;NAMPT                                                                                                                                                                                   |
| oas00770                                 | Pantothenate and CoA biosynthesis         |                                                                                                                         | PPCS;PANK3;DPYD                                                                                                                                                                                                         |
| oas00790                                 | Folate biosynthesis                       | SPR                                                                                                                     |                                                                                                                                                                                                                         |

|                                       |                                          |                                                                                                                                                                                                                                                                                                                                                                                                                                                                                                                        |                                                                                                                                                                                                      |
|---------------------------------------|------------------------------------------|------------------------------------------------------------------------------------------------------------------------------------------------------------------------------------------------------------------------------------------------------------------------------------------------------------------------------------------------------------------------------------------------------------------------------------------------------------------------------------------------------------------------|------------------------------------------------------------------------------------------------------------------------------------------------------------------------------------------------------|
| oas00830                              | Retinol metabolism                       | dehydrogenase/reductase SDR family member 4;cytochrome P450 2S1 isoform X2                                                                                                                                                                                                                                                                                                                                                                                                                                             | LRAT;RDH11                                                                                                                                                                                           |
| <b>Genetic information processing</b> |                                          |                                                                                                                                                                                                                                                                                                                                                                                                                                                                                                                        |                                                                                                                                                                                                      |
| oas03020                              | RNA polymerase                           | POLR3H;POLR2E;POLR2I                                                                                                                                                                                                                                                                                                                                                                                                                                                                                                   | POLR1B                                                                                                                                                                                               |
| oas03022                              | Basal transcription factor               | GTF2H4;GTF2F1;TAF10;ERCC2                                                                                                                                                                                                                                                                                                                                                                                                                                                                                              | TAF13;TAF7;CCNH;TAF8;TAF5;GTF2H3;general transcription factor IIH subunit 2 isoform X2;TAF9;CDK7;TAF4;TAF1                                                                                           |
| oas03050                              | Proteasome                               | PSMD4;PSME2;PSMB8;PSMC5;PSMD8;PSMB10;PSME1;PSMC3;PSMC1;PSMB3                                                                                                                                                                                                                                                                                                                                                                                                                                                           | PSME4;PSMD12;IFNG                                                                                                                                                                                    |
| oas03040                              | Spliceosome                              | SNRPA;PRPF31;PIIH;HNRNPA3;BUD31;PQBP1;SNRNP70;PUF60;LSM2;SF3B5;SRSF1;SF3A2;small nuclear ribonucleoprotein F-like                                                                                                                                                                                                                                                                                                                                                                                                      | SRSF3;TRA2A;RBM25;CRNKL1;PLRG1;RBMX;AQR;DDX46;DHX15;NCBP1;U2SURP;HNRNPA3;DDX5;SRSF6;WBP11;TCERG1;SRSF4;HNRNPC;DHX8;CDC40;TRA2B;SNW1;PRPF40A;PRPF8;SLU7;SRSF7;SRSF5;SRSF10;HNRNPA1;SRSF1;LSM5;PRPF38B |
| oas03010                              | Ribosome                                 | RPL13A;RPS6;RPS11;RPSA;RPL14;RPL19;RPS14;RPS9;60S ribosomal protein L6;60S ribosomal protein L27;RPLP2;MRPL36;MRPL23;RPS19;RPLP1;MRPL27;MRPL24;RPL36;40S ribosomal protein S2;MRPL28;RPL7A;60S ribosomal protein L10-like;RPL12;RPL8;RPS5;RPL18A;MRPL2;RPL29;MRPS12;MRPS15;MRPL11;MRPL21;MRPS18A;MRPL14;MRPS5;60S ribosomal protein L5;60S ribosomal protein L21-like;RPL28;RPL11;MRPL13;MRPS11;RPL18;60S ribosomal protein L23a;uncharacterized protein LOC105605134;RPS26;60S ribosomal protein L17;RPL13;UBA52;RPS2 | RPL6;RPS27                                                                                                                                                                                           |
| oas00970                              | Aminoacyl-tRNA-biosynthesis              | GATB;VAR5;CARS2;FARS2;MARS                                                                                                                                                                                                                                                                                                                                                                                                                                                                                             | IARS;LARS;KARS                                                                                                                                                                                       |
| oas04130                              | SNARE interaction in vesicular transport | VAMP5;VAMP8;STX4;BET1L;STX8;USE1;STX5                                                                                                                                                                                                                                                                                                                                                                                                                                                                                  | VAMP7;GOSR1;SEC22B;BET1;STX16;SNAP23;STX7;vesicle-associated membrane protein 3                                                                                                                      |

|                            |                           |                                                                                                                                                               |                                                                                                                                                                                                                                   |
|----------------------------|---------------------------|---------------------------------------------------------------------------------------------------------------------------------------------------------------|-----------------------------------------------------------------------------------------------------------------------------------------------------------------------------------------------------------------------------------|
| oas03013                   | RNA transport             | PABPC1;EIF1AX;NXT1;PYM1;SNUPN;RPP25;THOC5;RPP21;EIF4EBP1;EIF3G;EIF3B;PABPC5;EIF3I;GEMIN8;EIF4A1;EIF4EBP3                                                      | EIF4A2;EIF3A;UPF3B;PNN;NUP210L;NMD3;NCBP1;NUP107;NUP54;NUPL2;TPR;XPO T;UBE2I;EIF4E;CYFIP2;elongation factor 1-alpha 1;XPO5;TGS1;RNPS1;NUP58;SEN2;UPF2;E3 SUMO-protein ligase RanBP2 isoform X1;NUP35;FMR1;EIF3E;NDC1;EIF4G2;NUP43 |
| oas03018                   | RNA degradation           | PABPC1;PABPC5;DCPS;EXOSC6;EXOSC4;LSM2;CNOT2;PFKL;NUDT16                                                                                                       | BTG1;TOB2;XRN2;TOB1;XRN1;CNOT8;DIS3-like exonuclease 1;PARN;DHX36;EXOSC2;MTREX;CNOT6;CNOT7;LSM5;CNOT2                                                                                                                             |
| oas03015                   | mRNA surveillance pathway | PABPC1;NXT1;PYM1;PABPC5                                                                                                                                       | UPF3B;PNN;MSI2;NCBP1;eukaryotic peptide chain release factor subunit 1;SMG7;PPP1CC;PCF11;PPP2R5E;WDR33;PPP2R1B;HBS1-like protein;PPP2R2A;SMG1;PPP2CB;FIP1L1;RNPS1;UPF2;PPP2R5A;CSTF2T;NUDT21;POLA;CSTF3;PPP2CA                    |
| <b>Signal transduction</b> |                           |                                                                                                                                                               |                                                                                                                                                                                                                                   |
| oas04010                   | MAPK signaling pathway    | MAP3K12;CSF1;HRAS;TRAF2;MAP3K11;MAP4K4;CSF1R;MAPK8IP3;TRADD;PAK1;MAP2K2;HSPB1;VEGFB;MAPK12;MAPK11;MAPKAPK2;MAPK8IP2;ECSIT;FLNA;MAX;IRAK1;FLNB;JUND;NFKB2;IGF1 | RASGRP3;NRAS;SOS2;DUSP4;RAP1B;TGFA;MAP3K7;PPP3CB;RASA2;ATF2;TAOK1;PRKCA;RPS6KA3;RAPGEF2;PPM1B;KRAS;MAP2K4;CRK;RPS6KA5;MAPK8;RASA1;AKT2;PAK2;CASP3;FLT1;PRKACA;VEGFA;MYC                                                           |



|          |                                        |                                                                                                                                                                                               |                                                                                                                                                                                      |
|----------|----------------------------------------|-----------------------------------------------------------------------------------------------------------------------------------------------------------------------------------------------|--------------------------------------------------------------------------------------------------------------------------------------------------------------------------------------|
| oas04152 | AMPK signaling pathway                 | CCND1;CRTC2;RPS6KB2;EIF4EBP1;G6PC3;CREB3L3;PFKL;CPT1B;IGF1;PPARG                                                                                                                              | FOXO3;platelet glycoprotein 4-like isoform X1;SIRT1;EEF2K;RPS6KB1;PPP2R5E;MAP3K7;PPP2R1B;HMGCR;PIK3CA;PPP2R2A;PRKAB2;CREB3L1;PPP2CB;CAB39L;PDPK1;PPP2R5A;AKT2;PIK3R1;PPP2CA;SCD;LEPR |
| oas04910 | Insulin signaling pathway              | RPS6;PRKARIA;HRAS;FLOT1;EXOC7;FLOT2;PRKAR1B;RPS6KB2;EIF4EBP1;G6PC3;MAP2K2;CALM3;SH2B2;PYGB;BAD                                                                                                | GSK3B;NRAS;SOS2;PRKAR2B;PPP1CC;RPS6KB1;PIK3CA;PHKB;PHKA1;PTPRF;EIF4E;PRKAB2;SHC1;KRAS;E3 ubiquitin-protein ligase CBL-B;SOCS2;CRK;MAPK8;PDPK1;SOCS4;AKT2;PIK3R1;PRKACA               |
| oas04060 | Cytokine-cytokine receptor interaction | CNTFR;CSF1;GDF1;TNFSF9;TNFRSF18;CSF1R;CXCR2;LTBR;C-C motif chemokine 3;granulocyte-macrophage colony-stimulating factor receptor subunit alpha isoform X1;TNFRSF6B;TNFRSF11A;TNFRSF13B;IL17RE | BMPR2;LIFR;CXCL11;IL6ST;CCR3;ACVR1;LEPR;ACVR2A;GHR;IFNG;CCR9;TNFSF13B                                                                                                                |
| oas04150 | mTOR signaling pathway                 | RPS6;RHOA;TTI1;HRAS;LAMTOR4;ATP6V1B1;RPS6KB2;EIF4EBP1;FZD1;ATP6V1F;FMAP2K2;FZD9;SLC38A9;MLST8;LAMTOR2;IGF1                                                                                    | GSK3B;RRAGA;RHOA;ATP6V1A;NRAS;SOS2;RICTOR;RPS6KB1;RRAGB;SKP2;PIK3CA;PRKCA;RPS6KA3;folliculin-interacting protein 2 isoform X1;EIF4E;KRAS;SLC38A9;CAB39L;PDPK1;FZD5;AKT2;PIK3R1;WNT4  |
| oas04020 | Calcium signaling pathway              | ORAI1;SPHK1;PTGER3;ITPR1;PLCD1;TPCN1;TPCN2;PLCB3;CALM3;GRIN1;MYLK                                                                                                                             | ADRB2;ATP2A2;F2R;STIM2;SPHK2;PPP3CB;CAMK1D;PRKCA;PHKB;PHKA1;GNAQ;inositol 1,4,5-trisphosphate receptor type 2;CYSLTR2;MCU;PRKACA                                                     |

|          |                            |                                                                                                                                  |                                                                                                                                                                                                                                                                                                                              |
|----------|----------------------------|----------------------------------------------------------------------------------------------------------------------------------|------------------------------------------------------------------------------------------------------------------------------------------------------------------------------------------------------------------------------------------------------------------------------------------------------------------------------|
| oas03320 | PPAR signaling pathway     | ACSL6;ACAA1;RXRB;SLC27A1;NR1H3;apolipoprotein A-I;SLC27A4;CPT1B;PPARG                                                            | platelet glycoprotein 4-like isoform X1;PDPK1;CPT2;ACSL5;SCD;LPL;PPARA                                                                                                                                                                                                                                                       |
| oas04310 | Wnt signaling              | CCND1;CSNK2B;RHOA;FZD1;RUVBL1;FZD9;PLCB3                                                                                         | CCND3;GSK3B;RHOA;PSEN1;APC;CUL1;MAP3K7;PPP3CB;CHD8;PRKCA;LGR4;SIAH1;MAPK8;SENP2;DKK1;FZD5;CSNK1A1;WNT4;CSNK2A2;PRKACA;SMAD4;BAMBI                                                                                                                                                                                            |
| oas04015 | Rap1 signaling pathway     | RHOA;CSF1;HRAS;RAP1GAP;LPAR2;RAPGEF3;CSF1R;MAP2K2;PARD6A;VEGFB;MAPK12;PLCB3;MAPK11;CALM3;RASSF5;FARP2;GRIN1;IGF1                 | RHOA;RASGRP3;NRAS;F2R;RAP1B;PIK3CA;PRKCA;RAPGEF2;GNAQ;KRAS;CRK;PAR6B;MAGI3;AKT2;CDH1;PIK3R1;SIPA1L1;FLT1;VEGFA;ITGB1;ITGAL                                                                                                                                                                                                   |
| oas04115 | p53 signaling pathway      | CCND1;BID;TP73;COP1;BAX;IGF1                                                                                                     | APAF1;CCND3;SESN3;GORAB;bcl-2-like protein 1;ATR;PPM1D;CCNG2;SIAH1;CHEK1;PERP;SESN1;DDB2;CCNG1;RRM2B;bcl-2-like protein 1;cytochrome c;CASP3                                                                                                                                                                                 |
| oas04151 | PI3K-Akt signaling pathway | RPS6;CCND1;BCL2L1;CRTC2;GNB2;CSF1;HRAS;LPAR2;COL6A2;RPS6KB2;CSF1R;EIF4EBP1;G6PC3;CREB3L3;MAP2K2;MLST8;VEGFB;ITGB4;ITGA5;IGF1;BAD | CCND3;GSK3B;FOXO3;NRAS;SOS2;PIK3CG;GNB1;MTCP1;PHLPP2;F2R;bcl-2-like protein 1;TGFA;RPS6KB1;PPP2R5E;PPP2R1B;ATF2;MYB;PIK3CA;PRKCA;PPP2R2A;JAK1;EIF4E;CREB3L1;JAK2;KRAS;LPAR6;ITGA1;RBL2;PPP2CB;PDPK1;PPP2R5A;ITGA10;YWHAQ;PKN2;AKT2;PIK3R1;bcl-2-like protein 1;PPP2CA;FLT1;VEGFA;ITGB1;ITGAV;YWHAE;YWHAH;GHR;MYC;ITGA4;YWHAZ |

|                           |                                             |                                                                                                                                                                                                                                     |                                                                                                                                                                                                           |
|---------------------------|---------------------------------------------|-------------------------------------------------------------------------------------------------------------------------------------------------------------------------------------------------------------------------------------|-----------------------------------------------------------------------------------------------------------------------------------------------------------------------------------------------------------|
| oas04070                  | Phosphatidylinositol signaling              | MTMR14;ITPR1;PLCD1;PLCB3;CALM3;CDIPT                                                                                                                                                                                                | PIP4K2A;MTMR4;MTMR3;IMPAD1;PIK3CA;PRKCA;INPP4B;inositol 1,4,5-trisphosphate receptor type 2;PIP5K1A;MTM1;PIK3C2A;MTMR6;SACM1L;PIP4K2C;INPP5B;DGKE;PIK3R1;INPP5F                                           |
| <b>Cellular processes</b> |                                             |                                                                                                                                                                                                                                     |                                                                                                                                                                                                           |
| oas04141                  | Protein processing in endoplasmic reticulum | CALR;TRAF2;DNAJC5;SSR4;BCAP31;F-box only protein 6;WFS1;PREB;OS9;PRKCSH;UFD1;RRBP1;SSR2;UBE2D4;BAX;BAK1;CAPN1                                                                                                                       | DERL1;UBQLN1;ERN1;SAR1B;endoplasmic reticulum lectin 1;TRAM1;CUL1;UBE2J2;EDEM3;MAN1A2;SAR1A;EIF2AK3;UBE2J1;UBE2G1;SEL1L;DNAJA2;CKAP4;EIF2AK1;MAPK8;LMAN1;SEC63;SEC24A;AMFR;SEC24C;UFD1;HERPUD1;NGLY1;CANX |
| oas04142                  | Lysosome                                    | NPC2;PSAP;HEXA;NAGA;SMPD1;ACIP5;CTSZ;NAGLU;CD68;M6PR;NAGPA;GM2A;IDUA;CTSH;GNPTG;ARSG;LITAF;ABCA2;beta-hexosaminidase subunit beta-like isoform X1;CLN3;TCIRG1;CTSA;CD63;NAPSA;CLTB;GBA;SGSH;MCOLN1;ARSA;AP1S1;ATP6V0A1;SLC11A1;CTSV | AP1G1;CLTA;CTSO;natural resistance-associated macrophage protein 2 isoform X1;MFSD8;SLC17A5;IGF2R                                                                                                         |
| oas04530                  | Tight junction                              | CCND1;RHOA;PARD6A;CLDN15;MYL9                                                                                                                                                                                                       | RHOA;ROCK1;WHAMM;MYH9;RDX;PPP2R1B;PPP2R2A;PRKCE;EZR;RAPGEF2;PRKAB2;PPP2CB;MAPK8;PARD6B;ARHGAP17;NEDD4L;PPP2CA;PRKACA;ITGB1;PCNA                                                                           |
| oas04520                  | Adherens junction                           | CSNK2B;RHOA;FARP2                                                                                                                                                                                                                   | RHOA;LMO7;MAP3K7;PTPRF;SMAD2;CDH1;VCL;CSNK2A2;SMAD4                                                                                                                                                       |

**Figure S1.** Heatmap of gene expression of FADS isoforms.

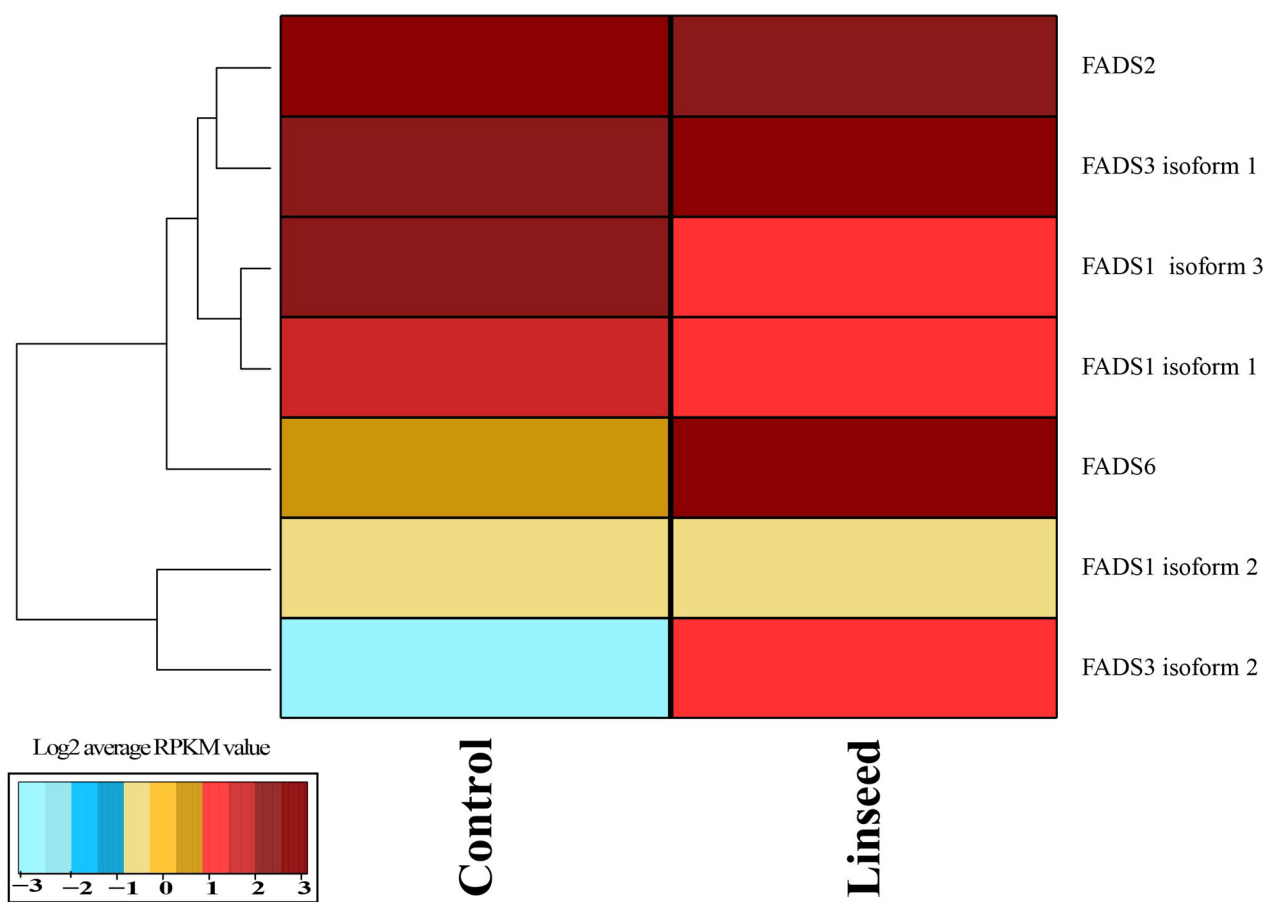

Supplement: s1 [file s1]
